# Supplementary material for: Metal-free synthesis of 1,1-dimethyl-2,2,2-trifluoroethyl substituted quinazolinones via tandem radical cyclization of quinazolin-4(3 H )-ones with 3,3,3-trifluoro-2,2-dimethylpropanoic acid
Source: Royal Society of Chemistry journal article supplement (doi:10.1039/d4ob00914b), 2024-01-01
Supplement: d4ob00914b1.pdf [file d4ob00914b1.pdf]

# Metal-free synthesis of 1,1-dimethyl-2,2,2-trifluoroethyl substituted quinazolinones via tandem radical cyclization of quinazolin-4(3H)-ones with 3,3,3-trifluoro-2,2-dimethylpropanoic acid

Shenyuan Gao<sup>a</sup>, Menglu Cai<sup>a</sup>, Xiaozhong Wang<sup>a,\*</sup>, Menglu Cai<sup>a</sup>, Dapeng Jiang<sup>a</sup>, Pen Lin<sup>a</sup>, Liyan Dai<sup>a,\*</sup>

<sup>a</sup> Zhejiang Provincial Key Laboratory of Advanced Chemical Engineering Manufacture Technology, College of Chemical and Biological Engineering, Zhejiang University, Hangzhou 310027, PR China. E-mail: caimenglu@zju.edu.cn

## Table of Contents

|                                   |     |
|-----------------------------------|-----|
| I. General information .....      | S1  |
| II. General procedure .....       | S2  |
| III. Mechanistic Studies .....    | S3  |
| IV. NMR spectra of Products ..... | S5  |
| V. Computational Details .....    | S35 |
| VI. Reference .....               | S43 |

### I. General information

Unless specifically mentioned otherwise, solvents and reagents were procured from commercial suppliers. The purification of products was carried out through silica gel column chromatography. <sup>1</sup>H NMR spectra were recorded at frequencies of 400, 500, or 600 MHz using Bruker instruments, while <sup>13</sup>C NMR spectra were captured at 101, 126, or 151 MHz with Bruker equipment. The chemical shifts for <sup>1</sup>H and <sup>13</sup>C NMR were referenced to internal Me<sub>4</sub>Si at 0 ppm. Notations such as br (broad), s (singlet), d (doublet), t (triplet), q (quartet), m (multiplet), and dd (doublet of doublet) were employed. Melting points were determined utilizing a WRS-1B melting point apparatus from Shanghai Shen Guang Instrument Co., Ltd., Shanghai, China.

### II. General procedure

#### (a) Synthesis of conjugated quinazoline-4(3H)-one derivatives 1 (1a as an example)<sup>1</sup>

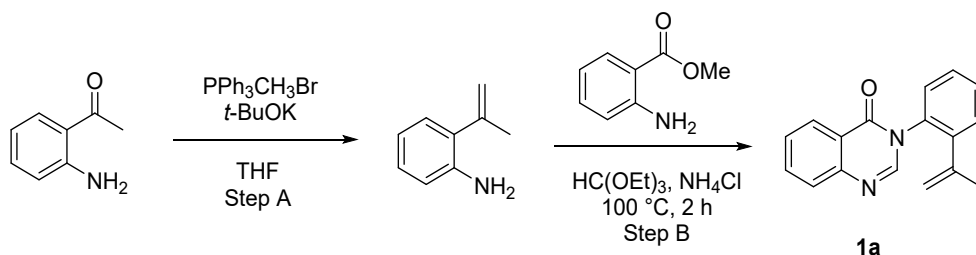

**Step A: Synthesis of 2-(prop-1-en-2-yl) aniline:** To a 250 mL oven-dried round-bottom flask was charged with methyltriphenylphosphonium bromide (10.72 g, 30 mmol) and THF (30 mL) under nitrogen atmosphere, followed by the addition of potassium tert-butoxide (3.36 g, 30 mmol) at 0 °C. The reaction mixture was allowed to warm to ambient temperature and stir for 30 minutes. Next, 2-aminoacetophenone (2.42 g, 10 mmol) was added. The reaction mixture was stirred at room temperature overnight. After completion, the reaction was quenched with water, and extracted with ethyl acetate (100 mL). The organic phase was dried over anhydrous Na<sub>2</sub>SO<sub>4</sub> and concentrated under reduced pressure. The reaction mixture was purified via flash column chromatography on silica gel to give 2-(prop-1-en-2-yl)aniline as a colorless oil.

**Step B: Synthesis of quinazoline-4(3*H*)-one derivative 1a:** A mixture of 2-amino-benzoic acid esters (2.5 mmol), 2-(prop-1-en-2-yl) aniline (3.0 mmol), ortho esters (3.8 mmol) and NH<sub>4</sub>Cl (1.0 mmol) was heated with stirring at 100 °C for 2 h. After cooling to room temperature, water was added, and the product was extracted with ethyl acetate (2×30 mL). The organic layer was dried with anhydrous Na<sub>2</sub>SO<sub>4</sub> and filtered. The filtrate was concentrated in vacuo. The crude product was purified by flash column chromatography on silica gel (PE:EA = 8:1) to afford quinazoline-4(3*H*)-one derivative **1a** as a white solid.

**(b) Synthesis of quinazoline-4(3*H*)-one derivatives 1 (1m as an example) <sup>2</sup>**

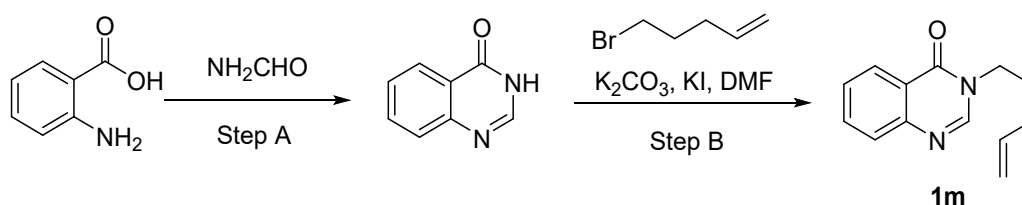

**Step A: Synthesis of quinazoline-4(3*H*)-one:** To a 10 mL round-bottomed flask equipped with a stir bar were added anthranilic acid (1.37g, 10 mmol) and formamide (4.0 mL, 100 mmol). The reaction mixture was stirred at 130 °C for 4 h. After full consumption of anthranilic acid, the reaction mixture was cooled to room temperature and then poured into icy water. The resultant light precipitates were filtered and washed three times with water (100 mL) and dried over vacuum to give quinazoline-4(3*H*)-one, which was used for the next step without further purification.

**Step B: Synthesis of quinazoline-4(3*H*)-one derivative 1m:** A 150 mL round-bottom flask equipped with a magnetic stirrer bar was charged with quinazolin-4(3*H*)-one (731mg, 5 mmol), potassium carbonate (1.38g, 10 mmol), and DMF (50 ml). The resulting mixture was heated to 80 °C with stirring for 30 min. After that, KI (83, 5 mmol) was added and after stirring for further 15 min, brominated olefins (711μL, 6 mmol) diluted with DMF (7 mL) was dropwise added into the mixture. The reaction mixture was heated to 60 °C in an oil bath and stirred for 3 h. After the reaction

completed, the resulting mixture was cooled to room temperature. The reaction mixture was washed with water and extracted with ethyl acetate three times. The combined organic layer was washed with brine, dried with anhydrous  $\text{Na}_2\text{SO}_4$  and evaporated, and the residue was purified through flash column chromatography on silica gel to afford desired product **1a** as a white solid.

**(c) General procedure for the synthesis of desired products 3 (3a as an example)**

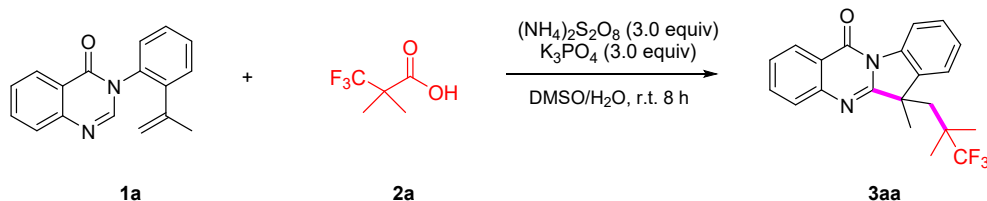

In a nitrogen atmosphere, 3-(2-(prop-1-en-2-yl)phenyl)quinazolin-4(3H)-one (**1a**) (0.2 mmol, 52.4 mg), 3,3,3-trifluoro-2,2-dimethylpropanoic acid (**2a**) (0.6 mmol, 93.7 mg),  $(\text{NH}_4)_2\text{S}_2\text{O}_8$  (0.6 mmol, 136.8 mg), and DMSO/ $\text{H}_2\text{O}$  (v/v=4/1, 2 mL) were added to a Schlenk flask. The reaction mixture was stirred at  $80^\circ\text{C}$  for 8 hours. After complete consumption of the starting material **1a**, 10 mL of saturated potassium carbonate solution was added. The mixture was extracted with ethyl acetate (10 mL  $\times$  3), and the solvent was removed under vacuum. Flash column chromatography using a mixture of Petroleum ether and ethyl acetate as the eluent was employed to purify the residue, yielding the desired product **3aa** with an 77% yield.

### III. Mechanistic Studies

**(a) Radical-trapping experiment using TEMPO as the radical scavenger**

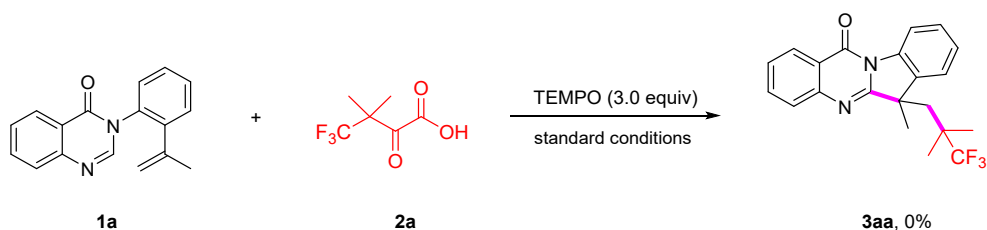

In a nitrogen atmosphere, 3-(2-(prop-1-en-2-yl)phenyl)quinazolin-4(3H)-one (**1a**) (0.2 mmol, 52.4 mg), TEMPO (93.8 mg, 0.6 mmol), 3,3,3-trifluoro-2,2-dimethylpropanoic acid (**2a**) (0.6 mmol, 93.7 mg),  $(\text{NH}_4)_2\text{S}_2\text{O}_8$  (0.6 mmol, 136.8 mg), and DMSO/ $\text{H}_2\text{O}$  (v/v=2/1, 2 mL) were added to a Schlenk flask. The reaction mixture was stirred at  $80^\circ\text{C}$  for 8 hours. The progress of the reaction was monitored by TLC. After the specified time, no corresponding product **3aa** was formed by TLC analysis.

**(b) Control reaction using 1,1-diphenylethylene as the radical-trapping reagent**

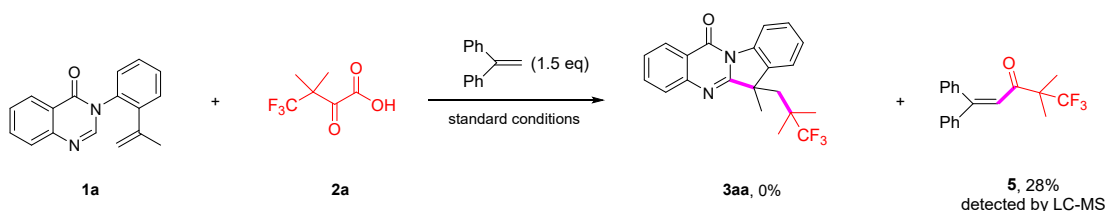

In a nitrogen atmosphere, 3-(2-(prop-1-en-2-yl)phenyl)quinazolin-4(3H)-one (**1a**) (0.2 mmol, 52.4

mg), 1,1- diphenylethylene (106.4  $\mu$ L, 0.6 mmol), 2-oxo-2-(phenylamino)acetic acid (**2a**) (0.6 mmol, 93.7 mg),  $(\text{NH}_4)_2\text{S}_2\text{O}_8$  (0.6 mmol, 136.8 mg), and DMSO/ $\text{H}_2\text{O}$  (v/v=2/1, 2 mL) were added to a Schlenk flask. The reaction mixture was stirred at 80°C for 8 hours. After completion of the reaction, the resulting mixture was analyzed by GC-MS. No corresponding product **3aa** was detected and the heck-type product **5** was isolated in 28% yield.

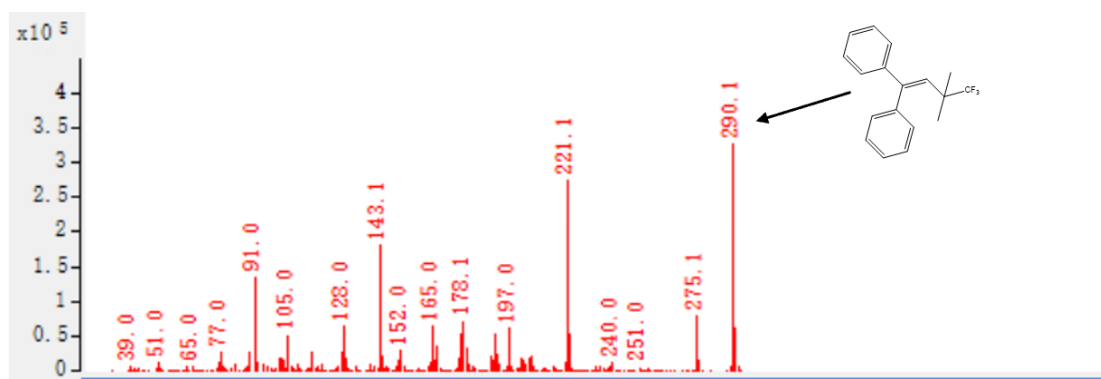

Figure S1: Radical trapping experiment





**3aa**  $^{19}\text{F}$  Chloroform-*d*, 376 MHz

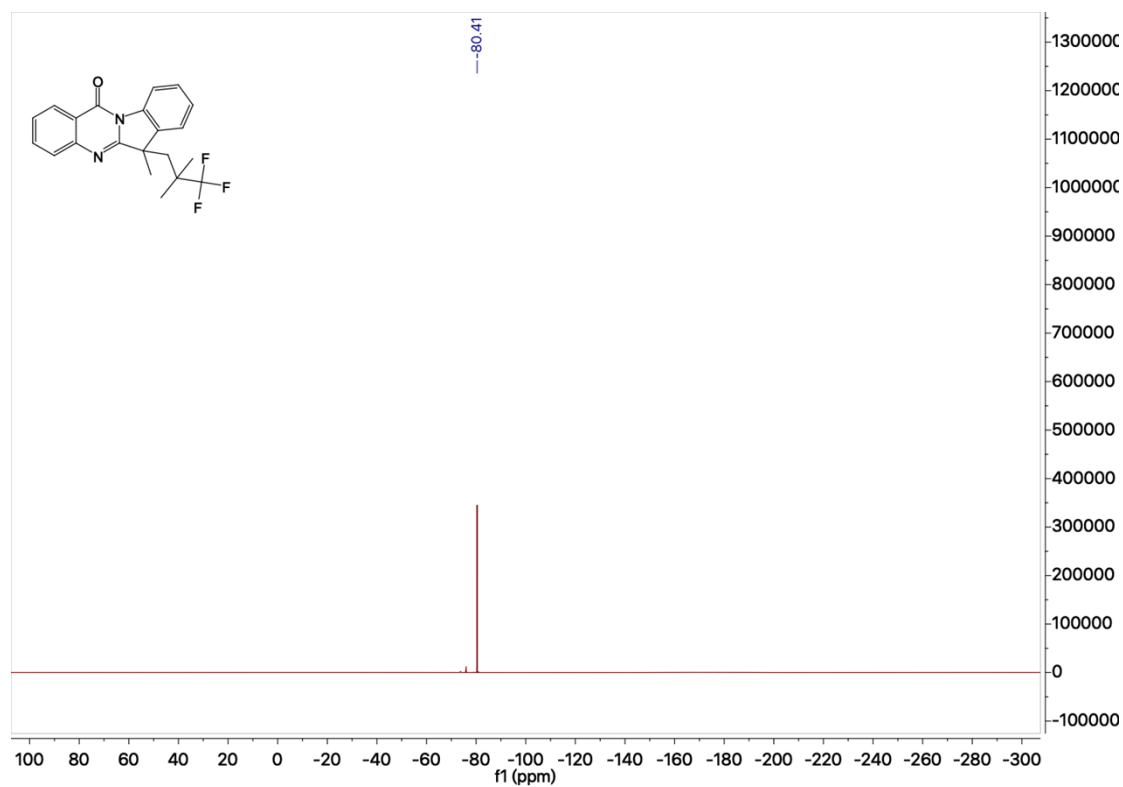

**3ab**  $^1\text{H}$  Chloroform-*d*, 400 MHz

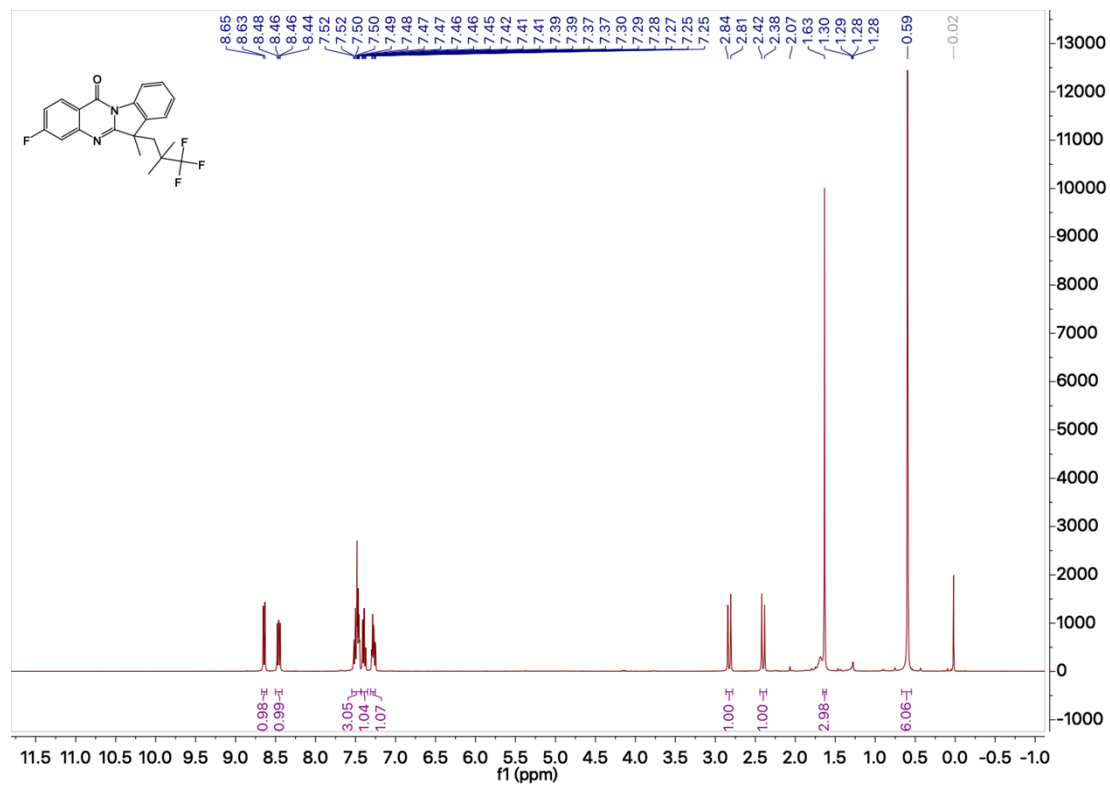

**3ab**  $^{13}\text{C}$  Chloroform-*d*, 101 MHz

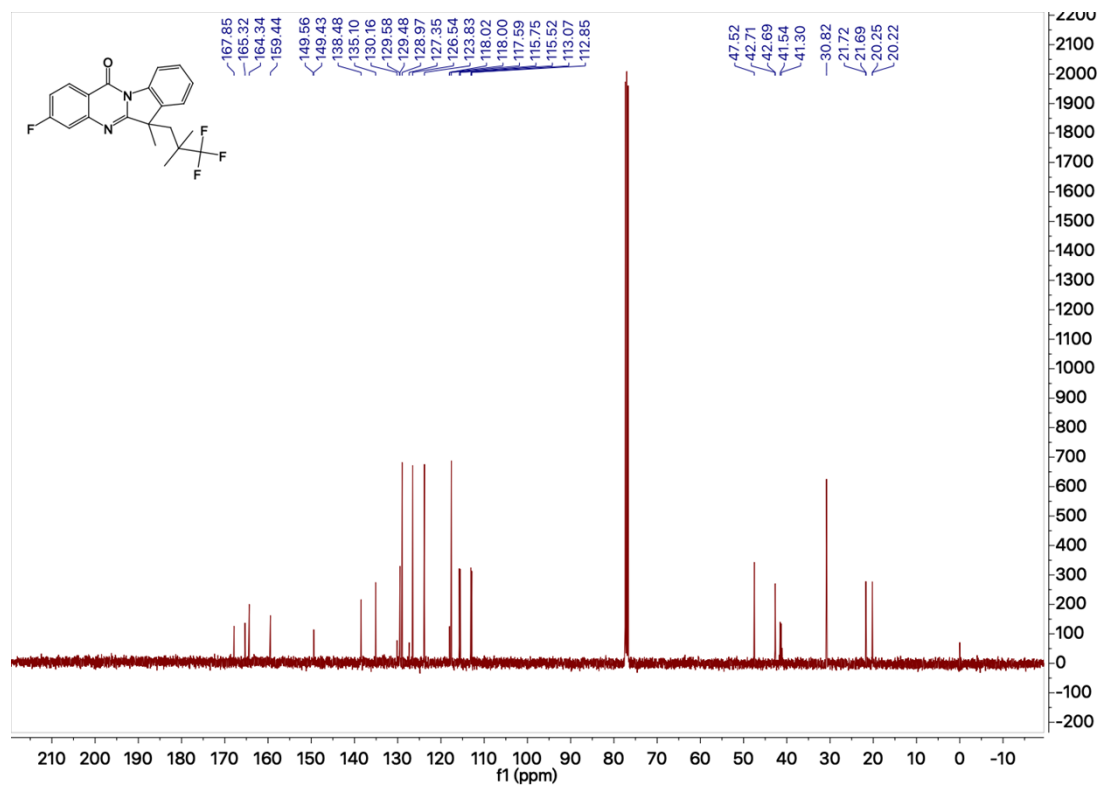

**3ab**  $^{19}\text{F}$  Chloroform-*d*, 376 MHz

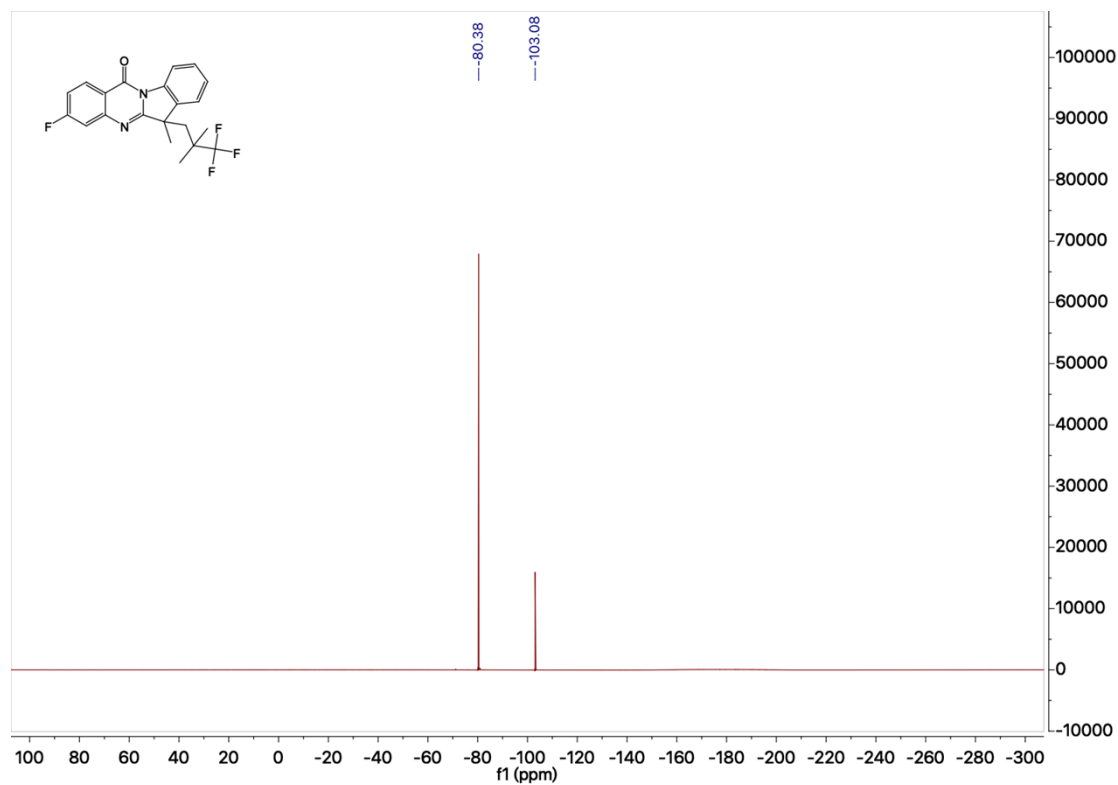

**3ac**  $^1\text{H}$  Chloroform-*d*, 400 MHz

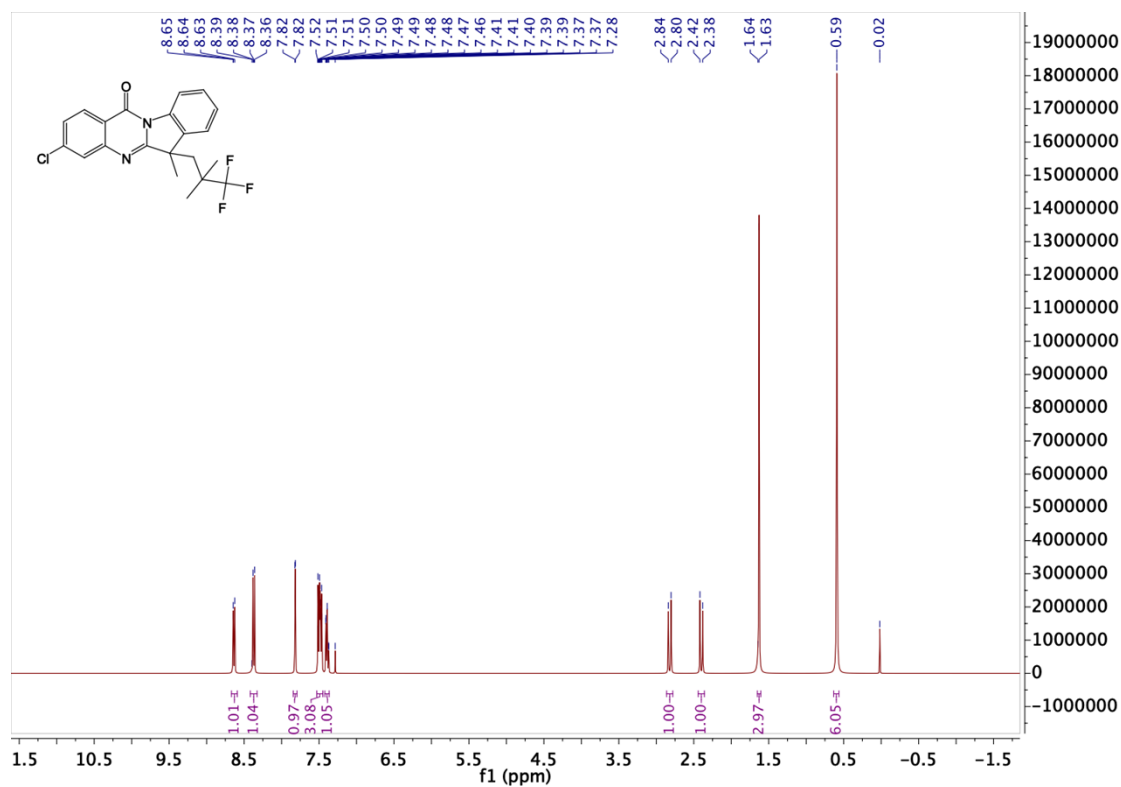

**3ac**  $^{13}\text{C}$  Chloroform-*d*, 101 MHz

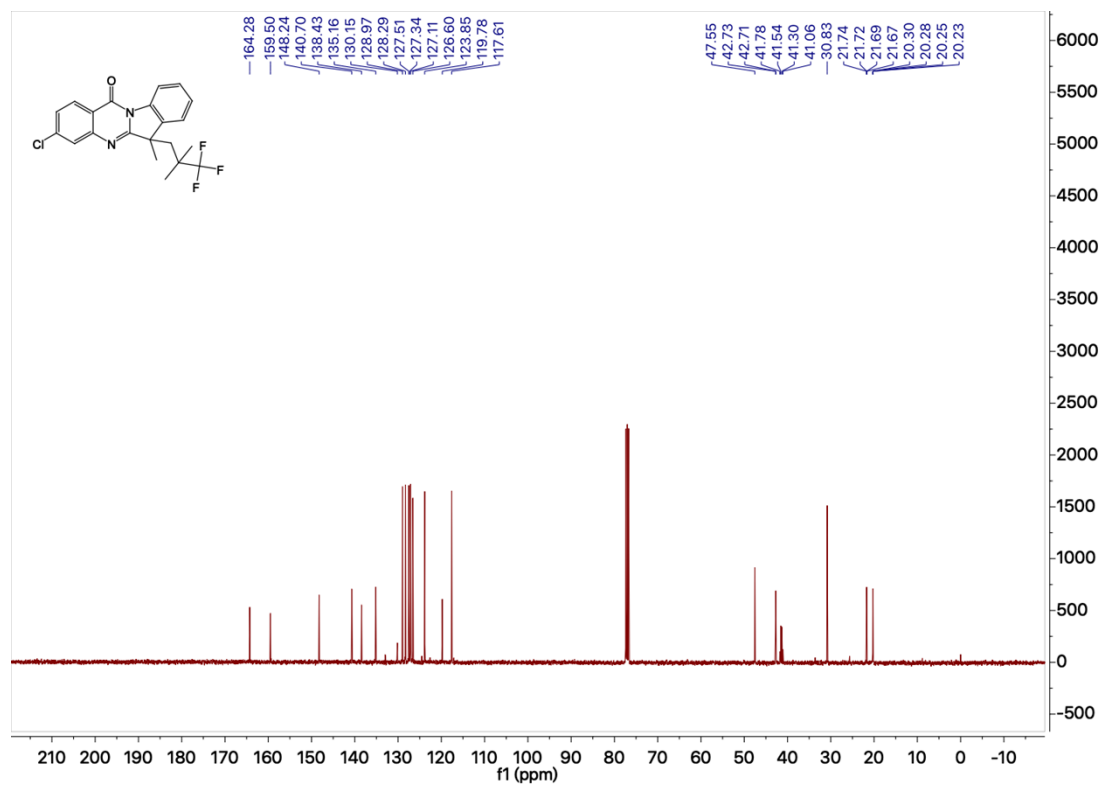

**3ac**  $^{19}\text{F}$  Chloroform-*d*, 376 MHz

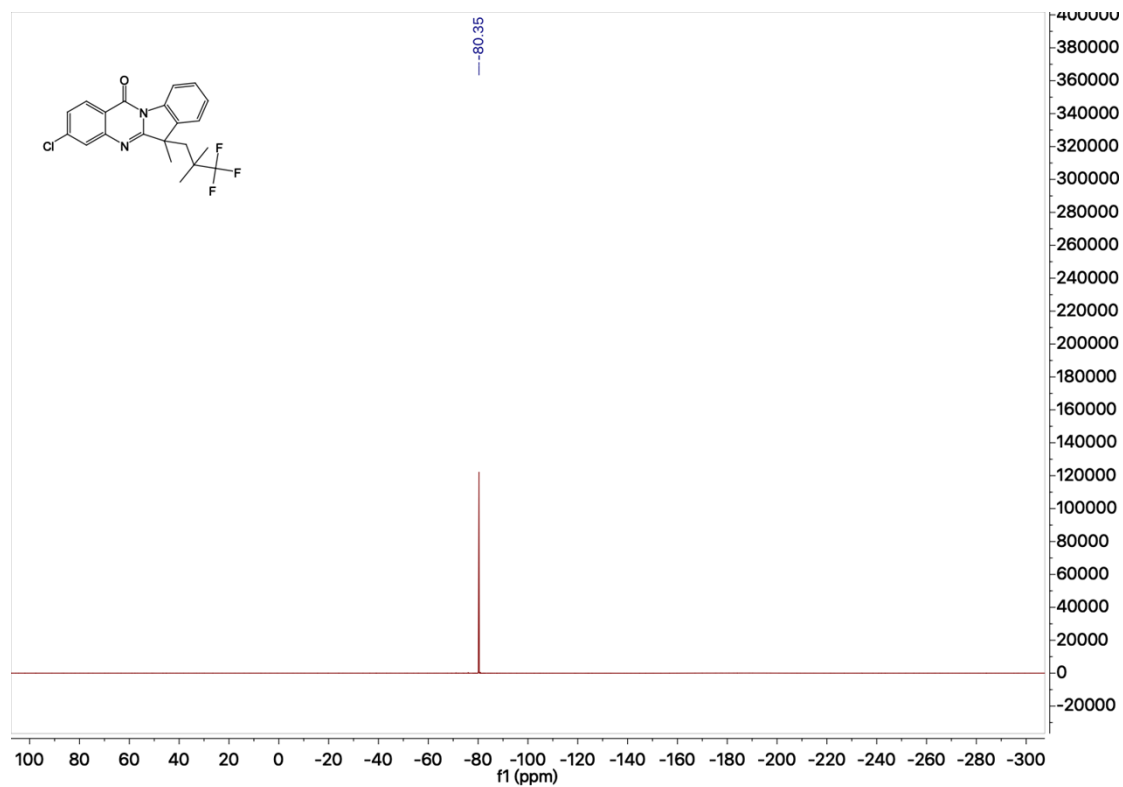

**3ae**  $^1\text{H}$  Chloroform-*d*, 400 MHz

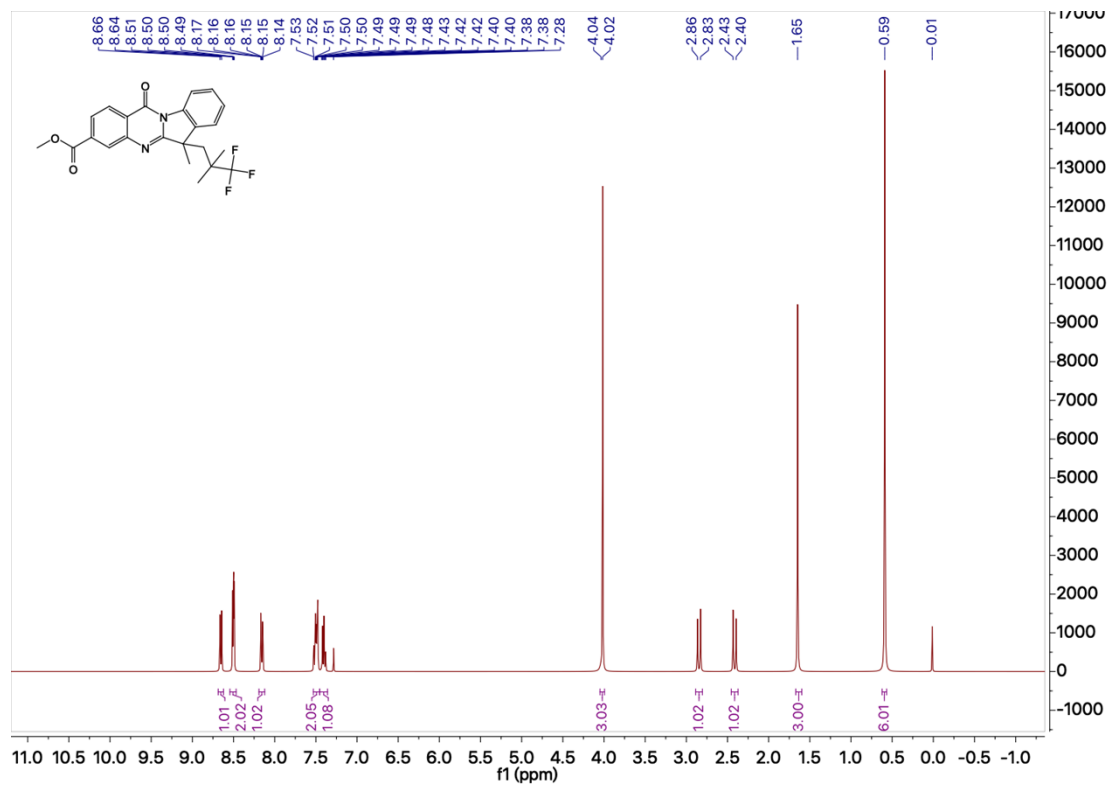

**3ae**  $^{13}\text{C}$  Chloroform-*d*, 101 MHz

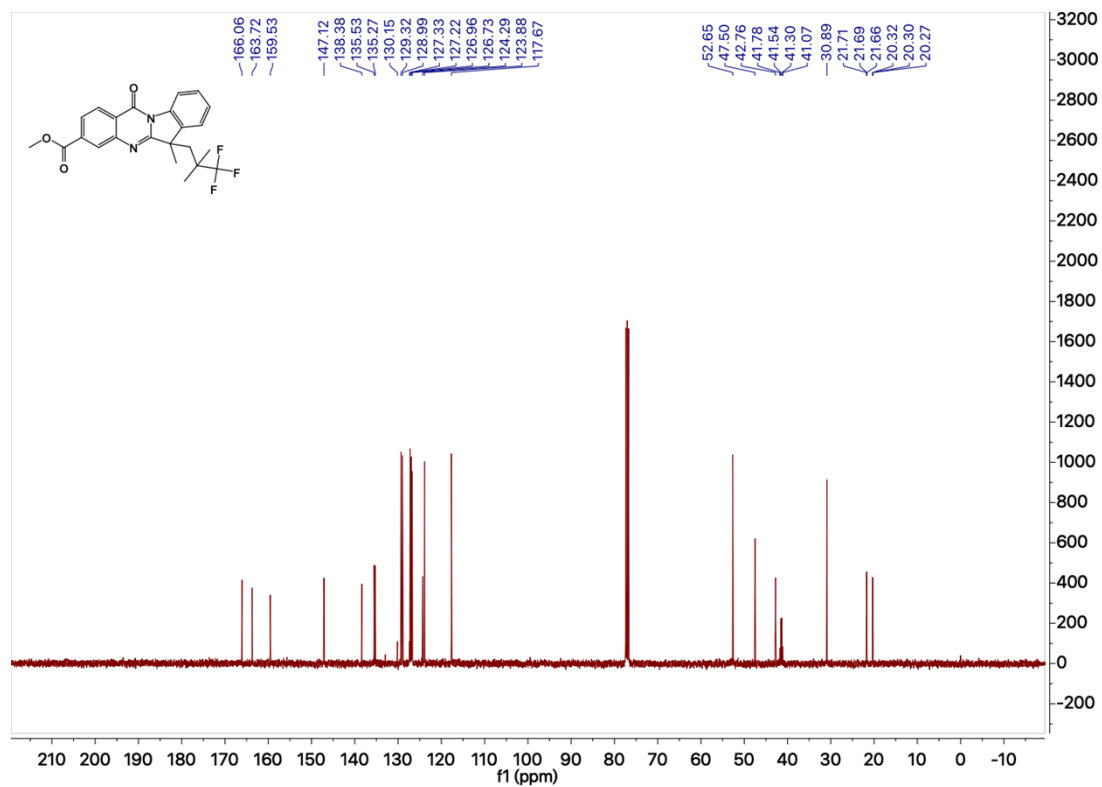

**3ae**  $^{19}\text{F}$  Chloroform-*d*, 376 MHz

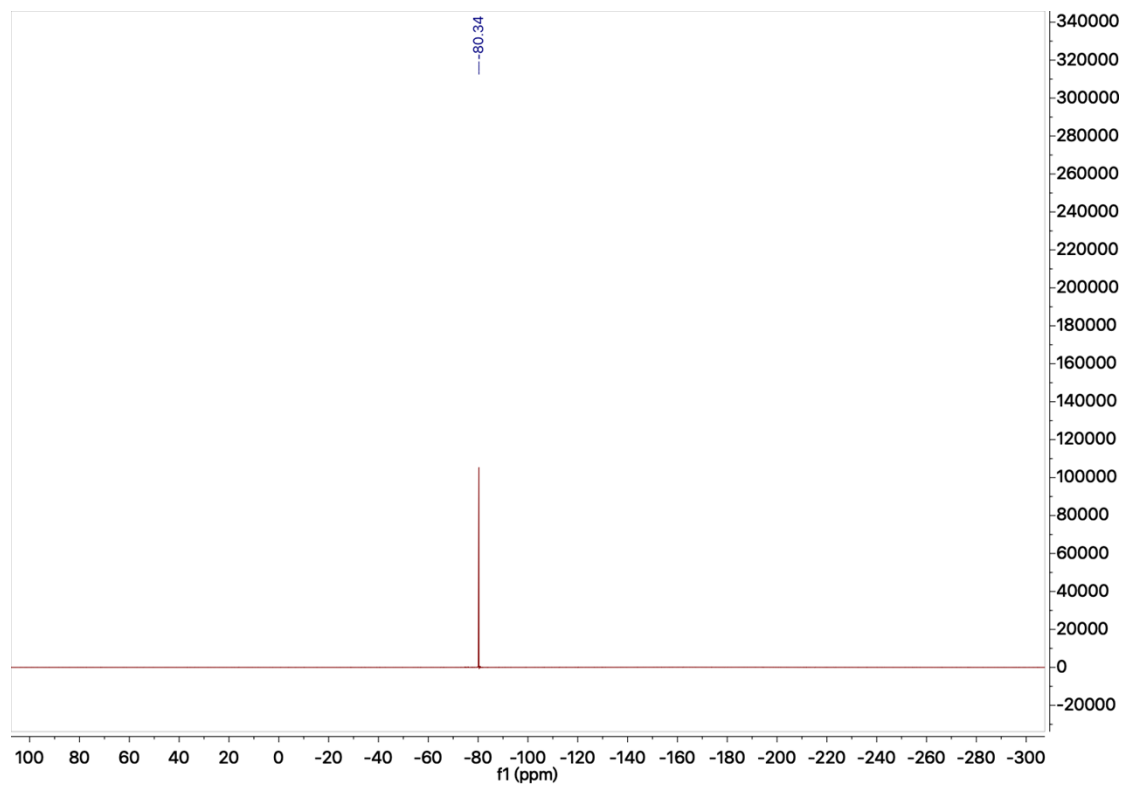

**3af** <sup>1</sup>H Chloroform-*d*, 400 MHz

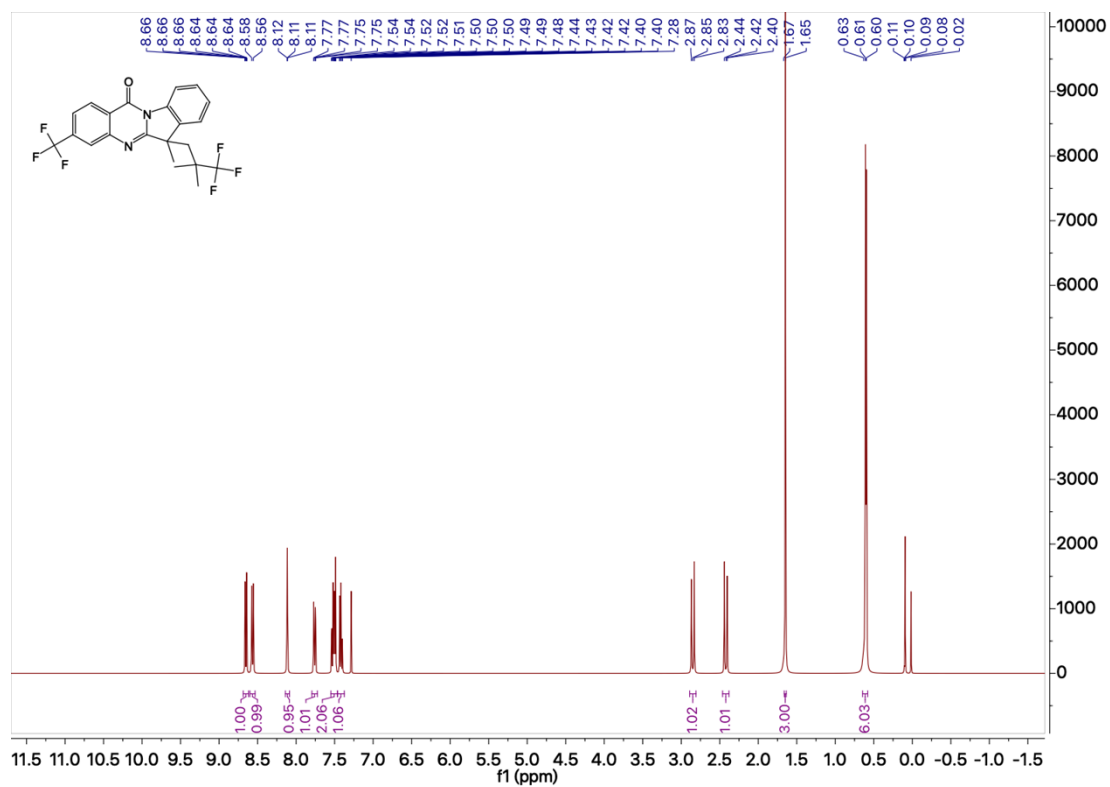

**3af** <sup>13</sup>C Chloroform-*d*, 101 MHz

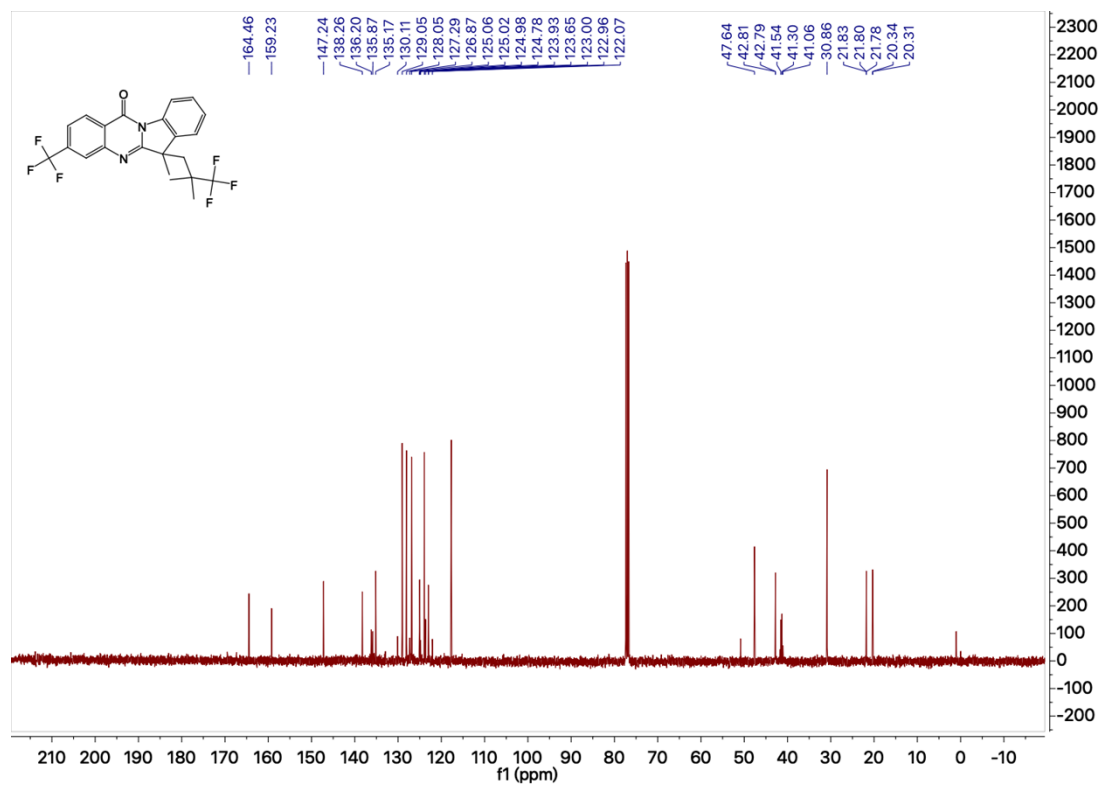

**3af**  $^{19}\text{F}$  Chloroform-*d*, 376 MHz

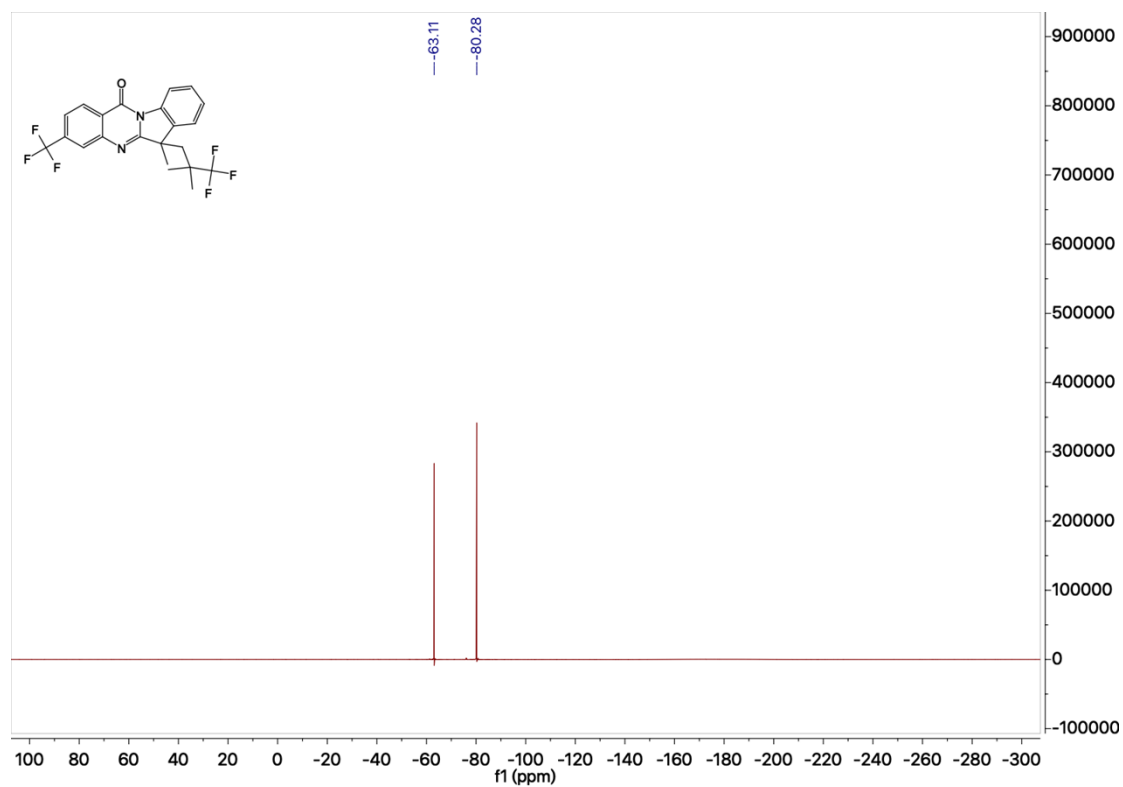

**3ag**  $^1\text{H}$  Chloroform-*d*, 400 MHz

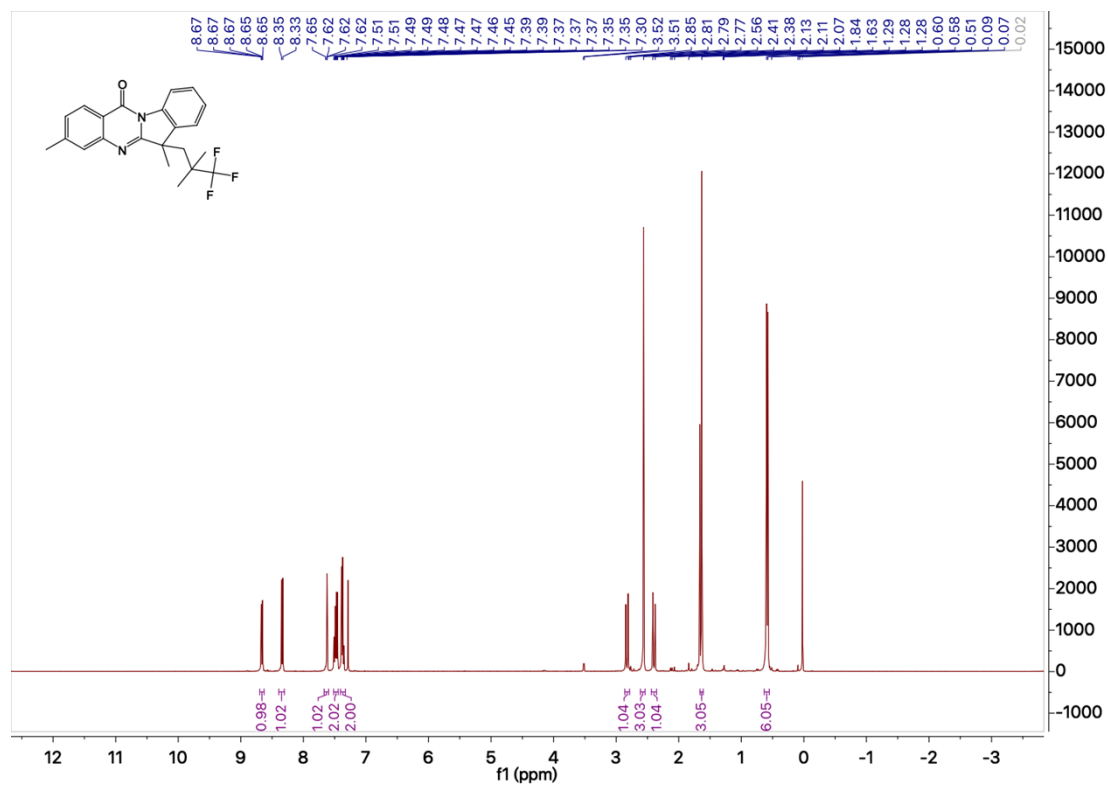



**3ag**  $^{13}\text{C}$  Chloroform-*d*, 101 MHz

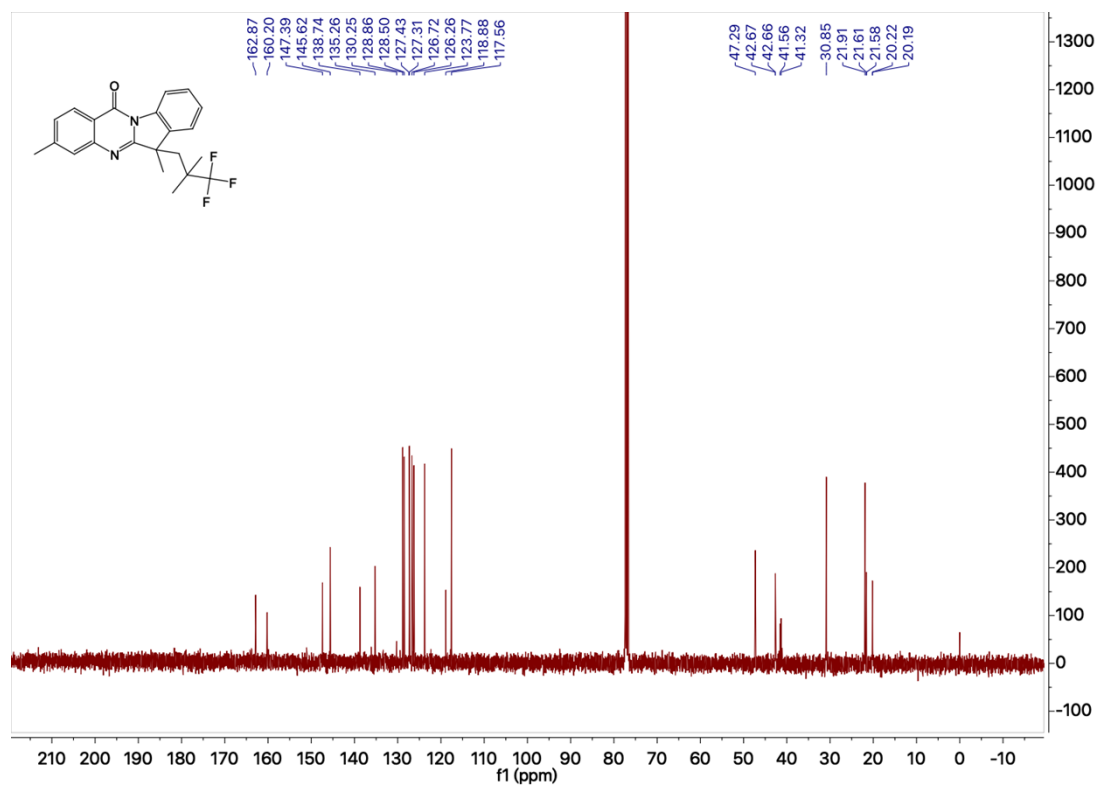

**3ag**  $^{19}\text{F}$  Chloroform-*d*, 376 MHz

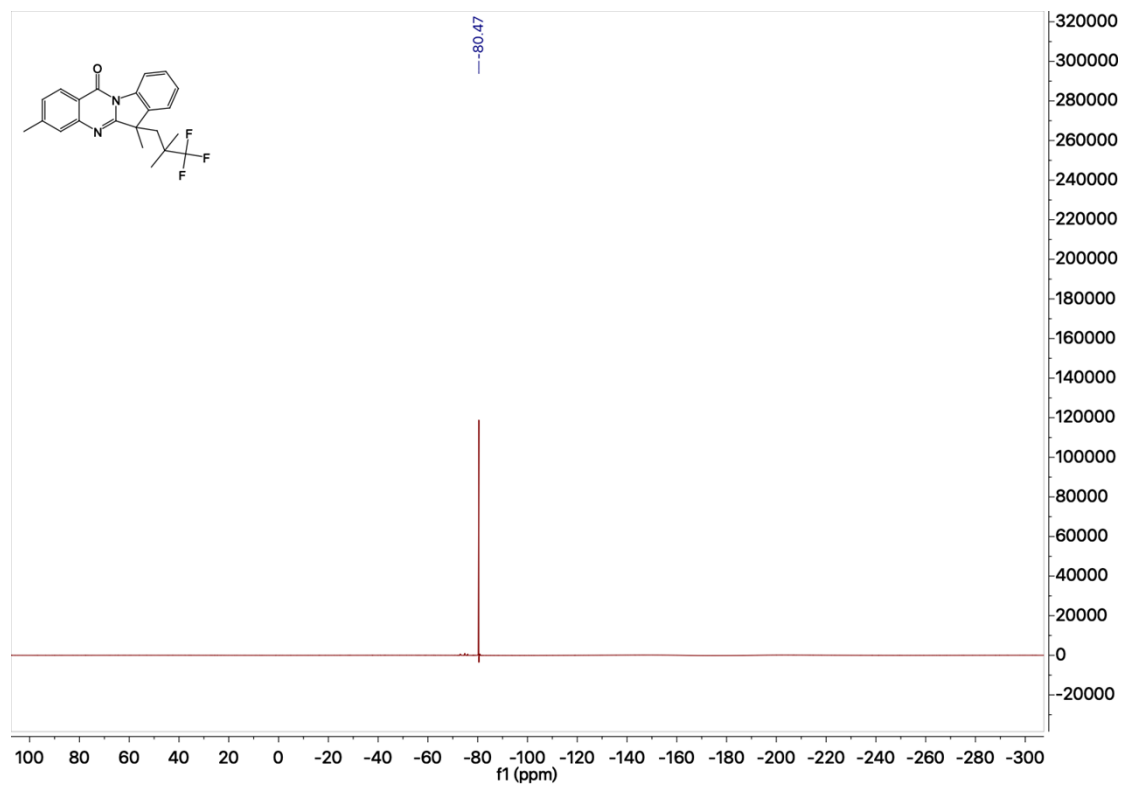

**3ah**  $^1\text{H}$  Chloroform-*d*, 400 MHz

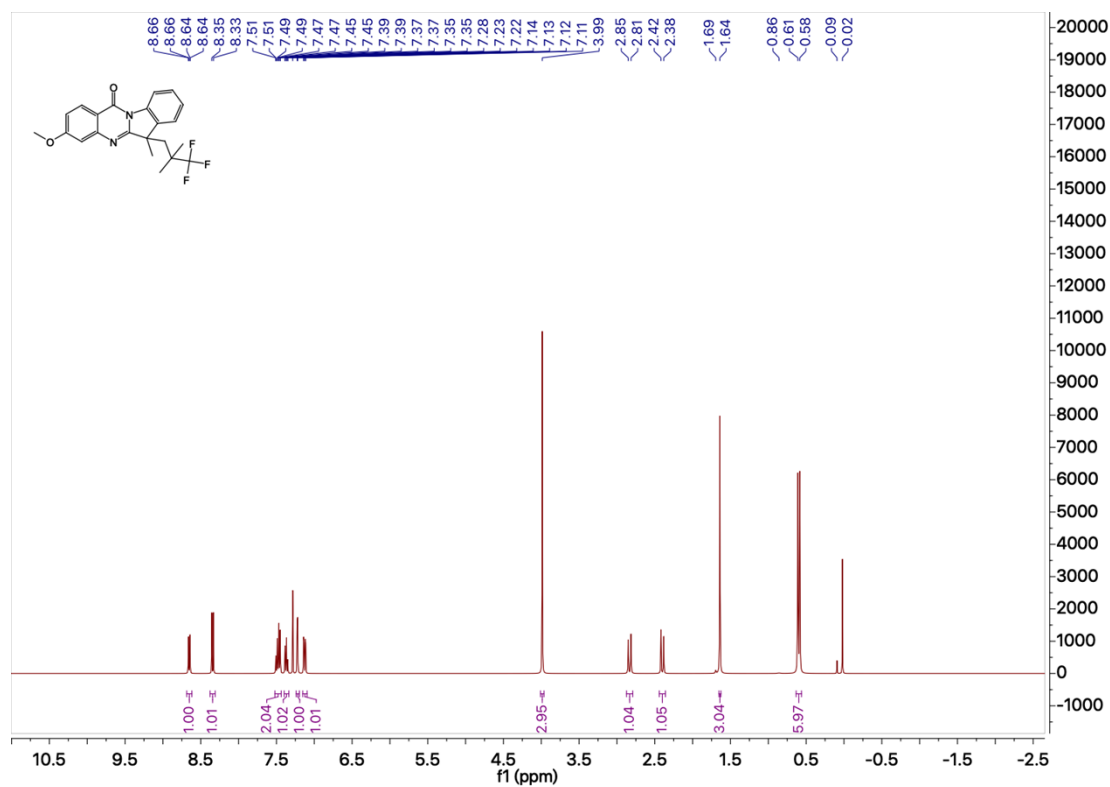

**3ah**  $^{13}\text{C}$  Chloroform-*d*, 101 MHz

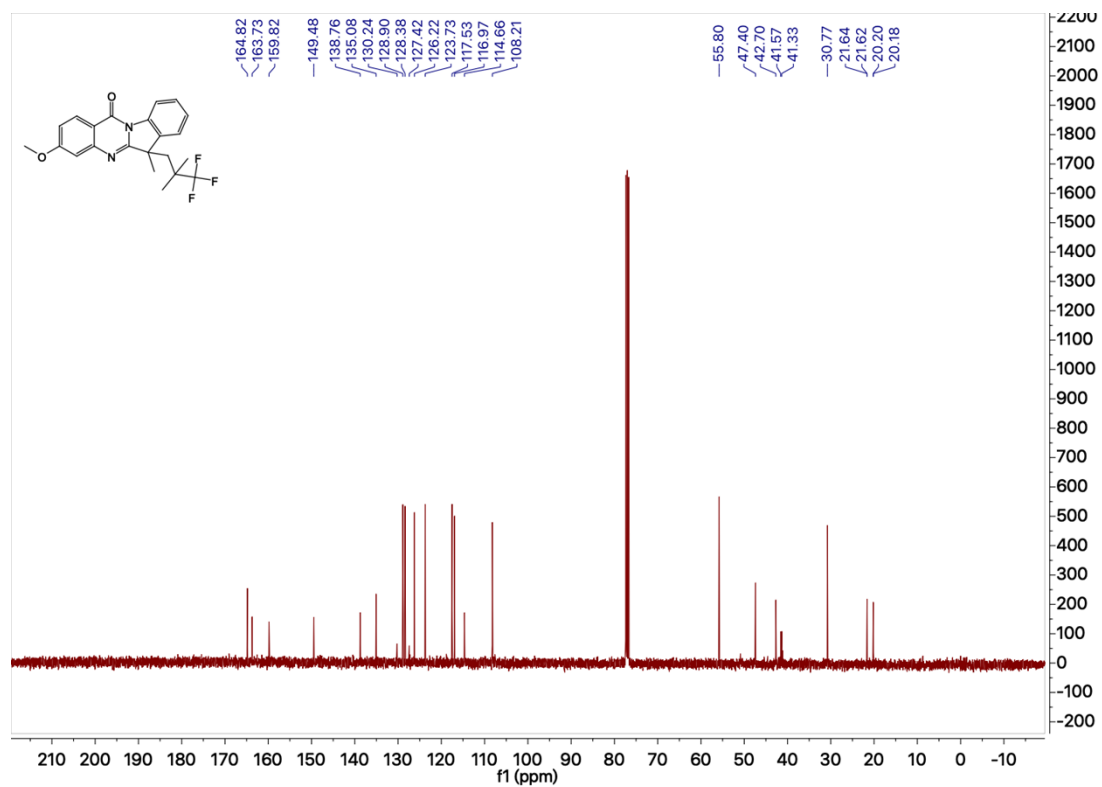

**3ah**  $^{19}\text{F}$  Chloroform-*d*, 376 MHz

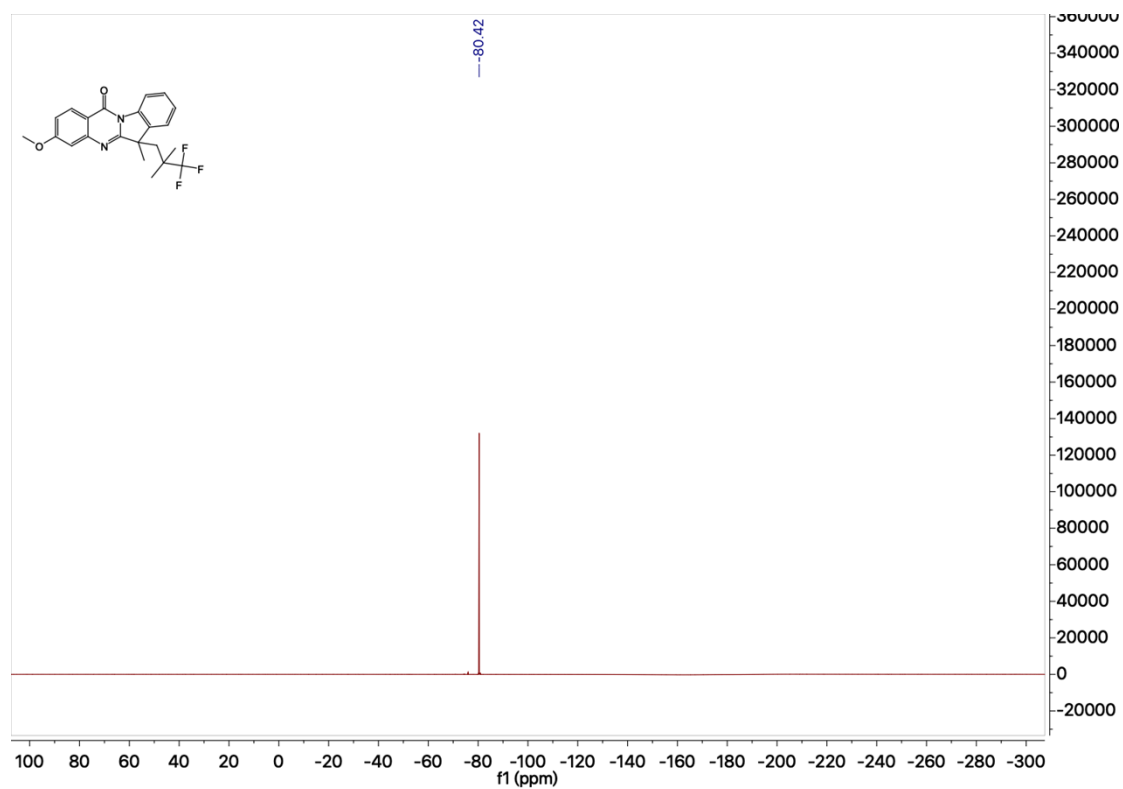

**3ai**  $^1\text{H}$  Chloroform-*d*, 400 MHz

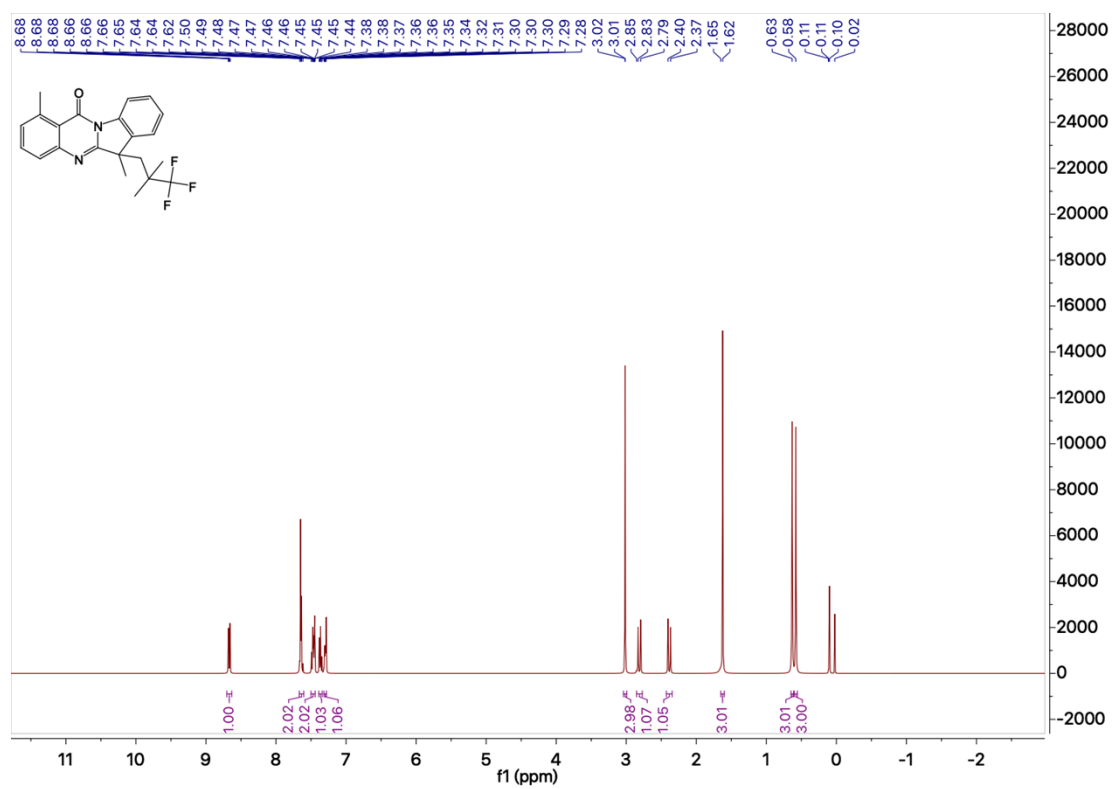

**3ai**  $^{13}\text{C}$  Chloroform-*d*, 101 MHz

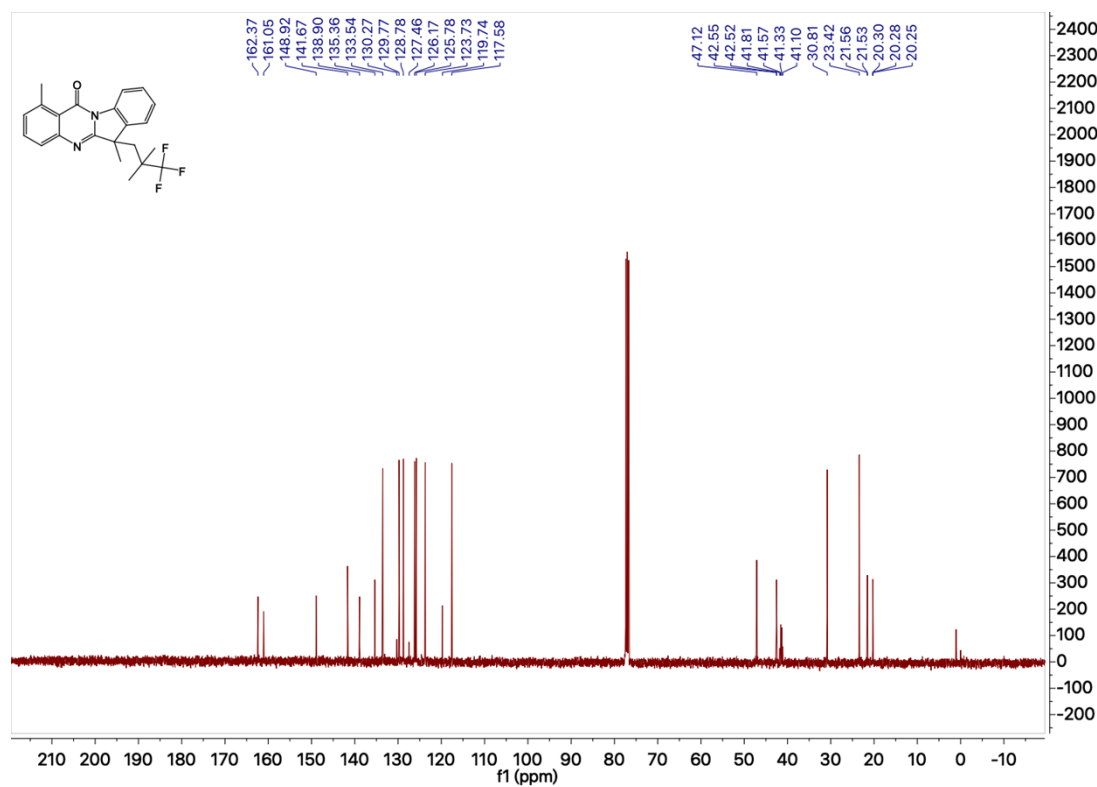

**3ai**  $^{19}\text{F}$  Chloroform-*d*, 376 MHz

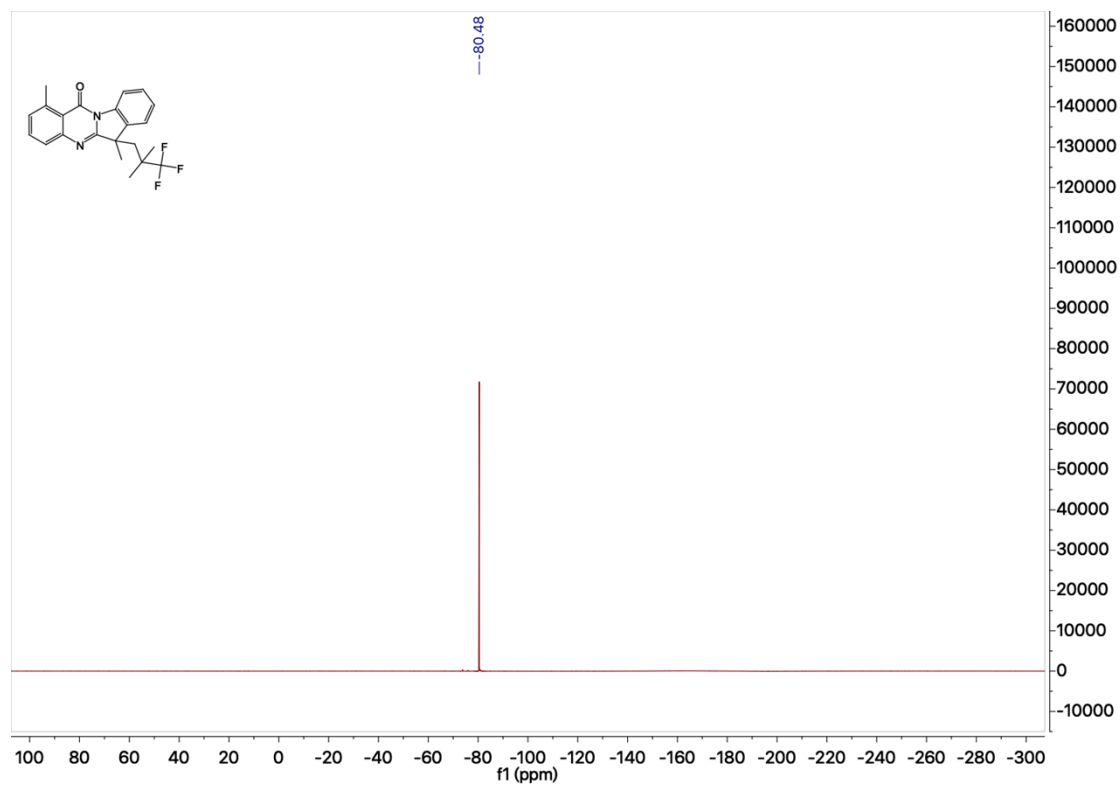

**3aj**  $^1\text{H}$  Chloroform-*d*, 400 MHz

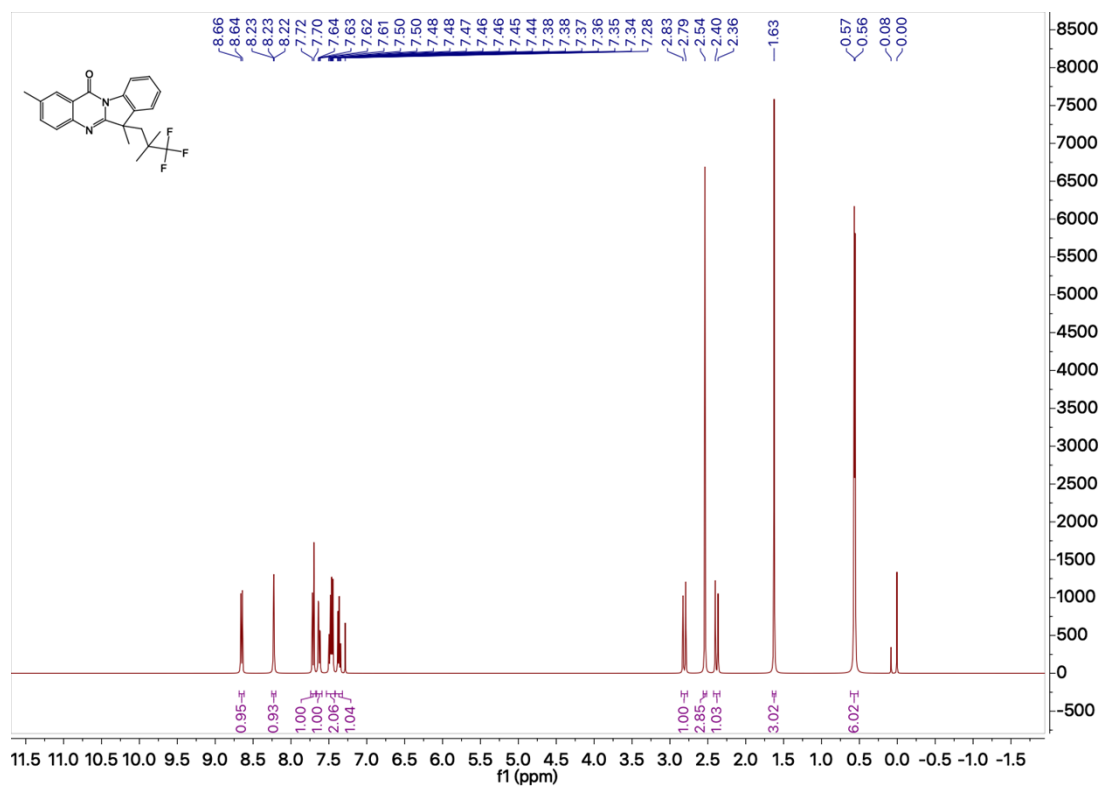

**3aj**  $^{13}\text{C}$  Chloroform-*d*, 101 MHz

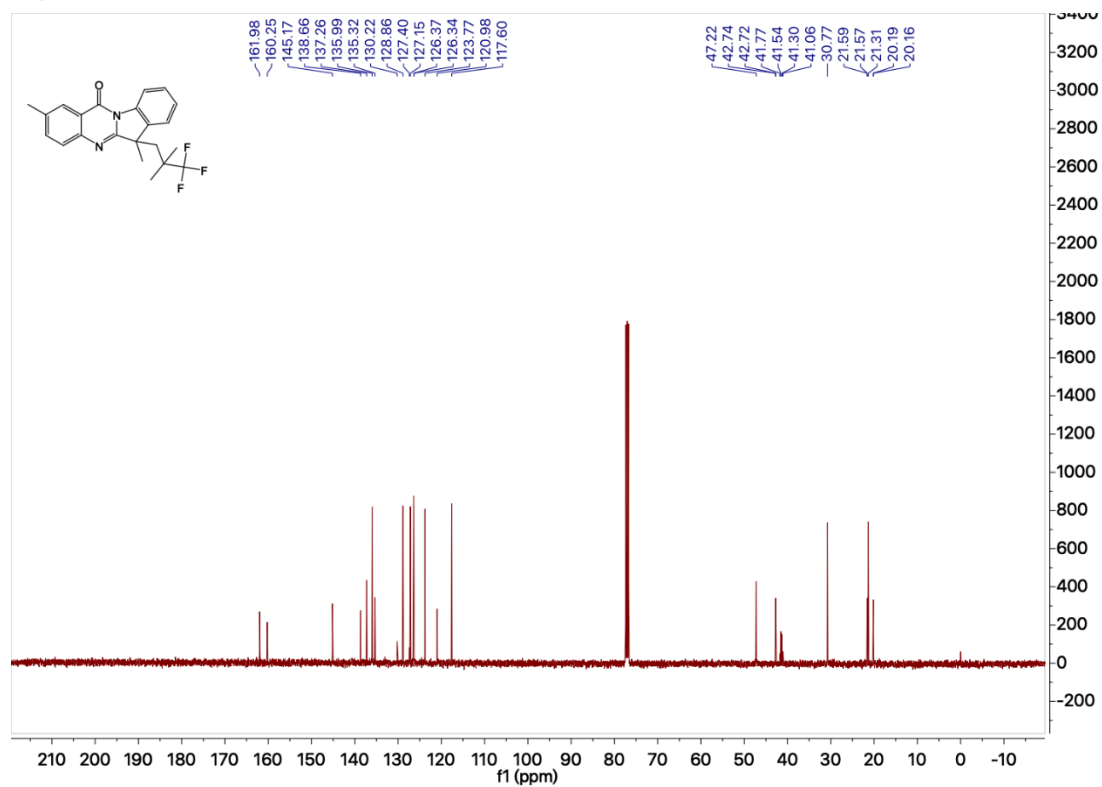

**3aj**  $^{19}\text{F}$  Chloroform-*d*, 376 MHz

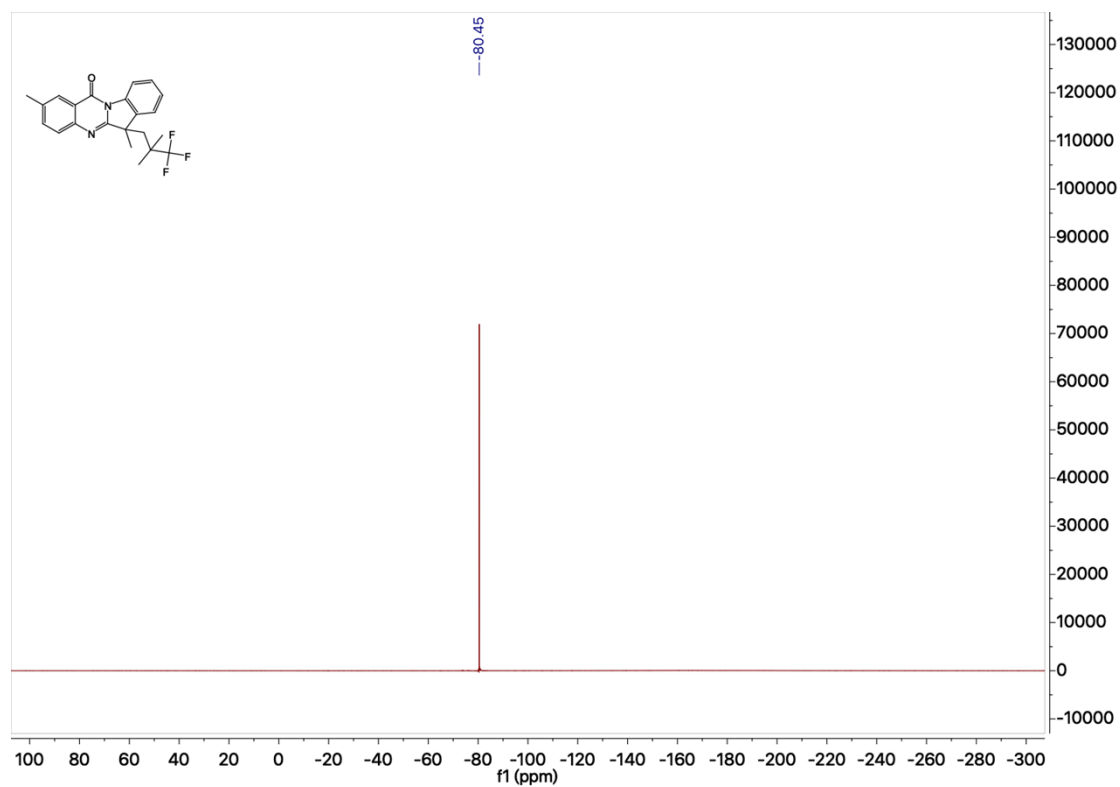

**3ak**  $^1\text{H}$  Chloroform-*d*, 400 MHz

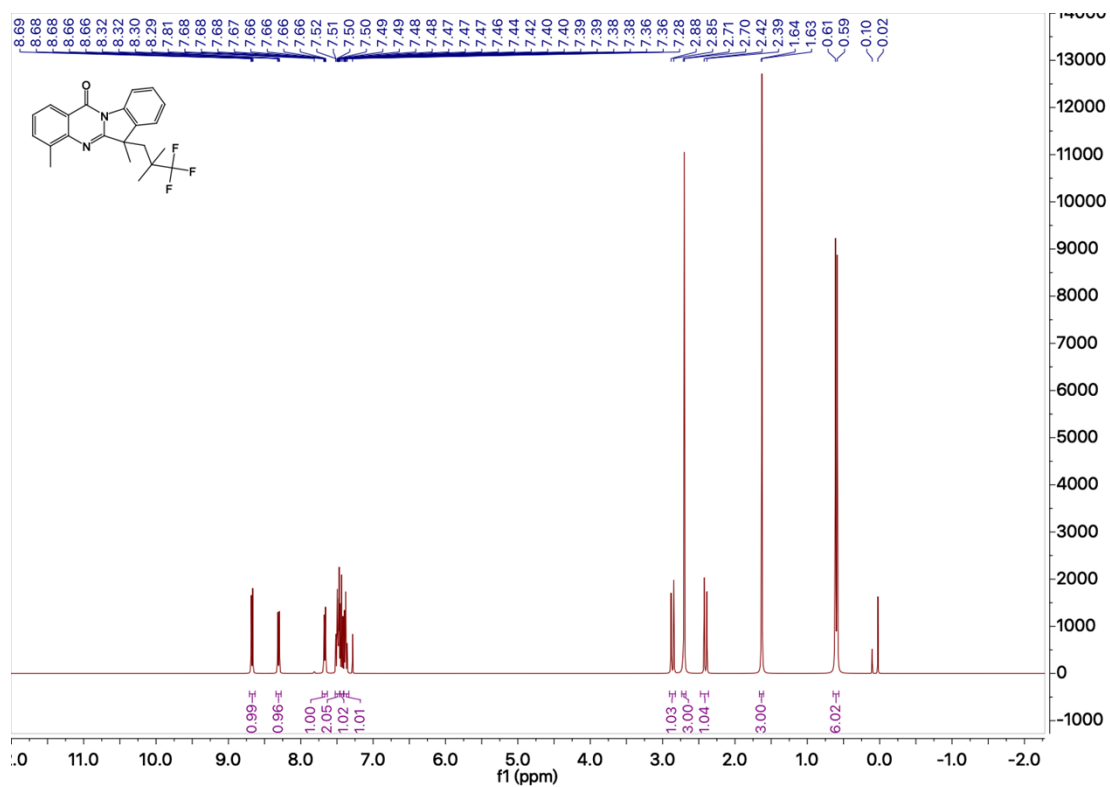

**3ak**  $^{13}\text{C}$  Chloroform-*d*, 101 MHz

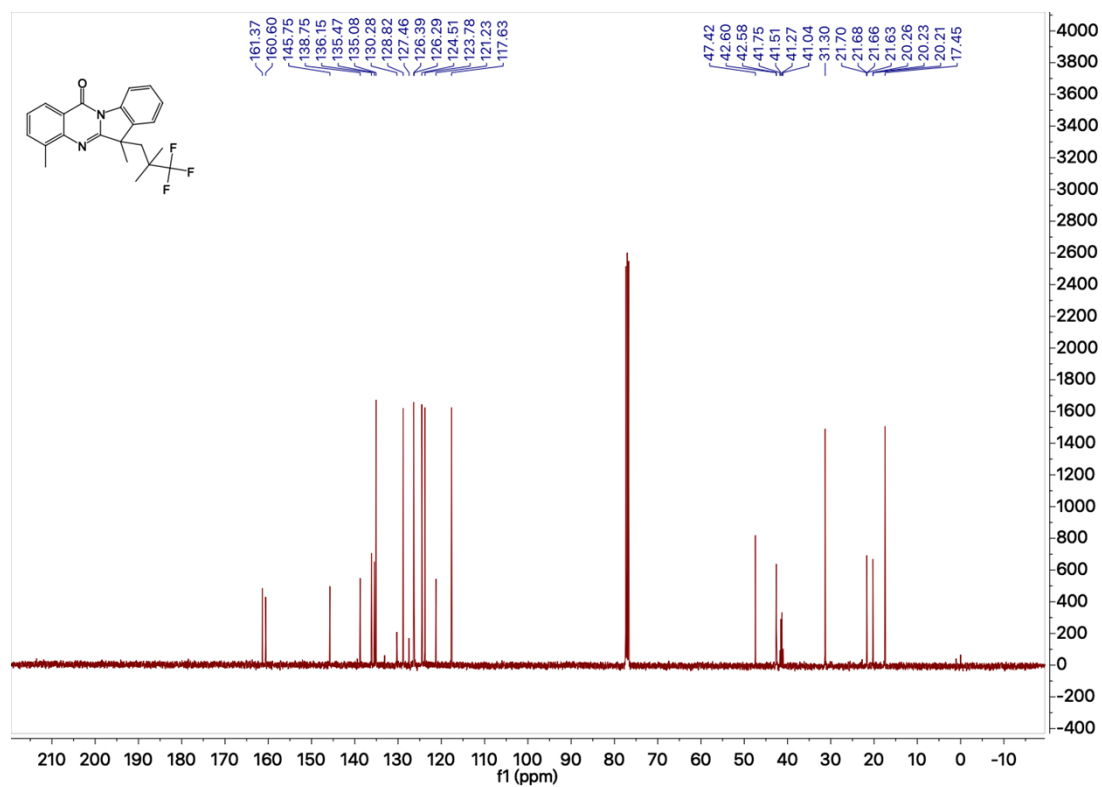

**3ak**  $^{19}\text{F}$  Chloroform-*d*, 376 MHz

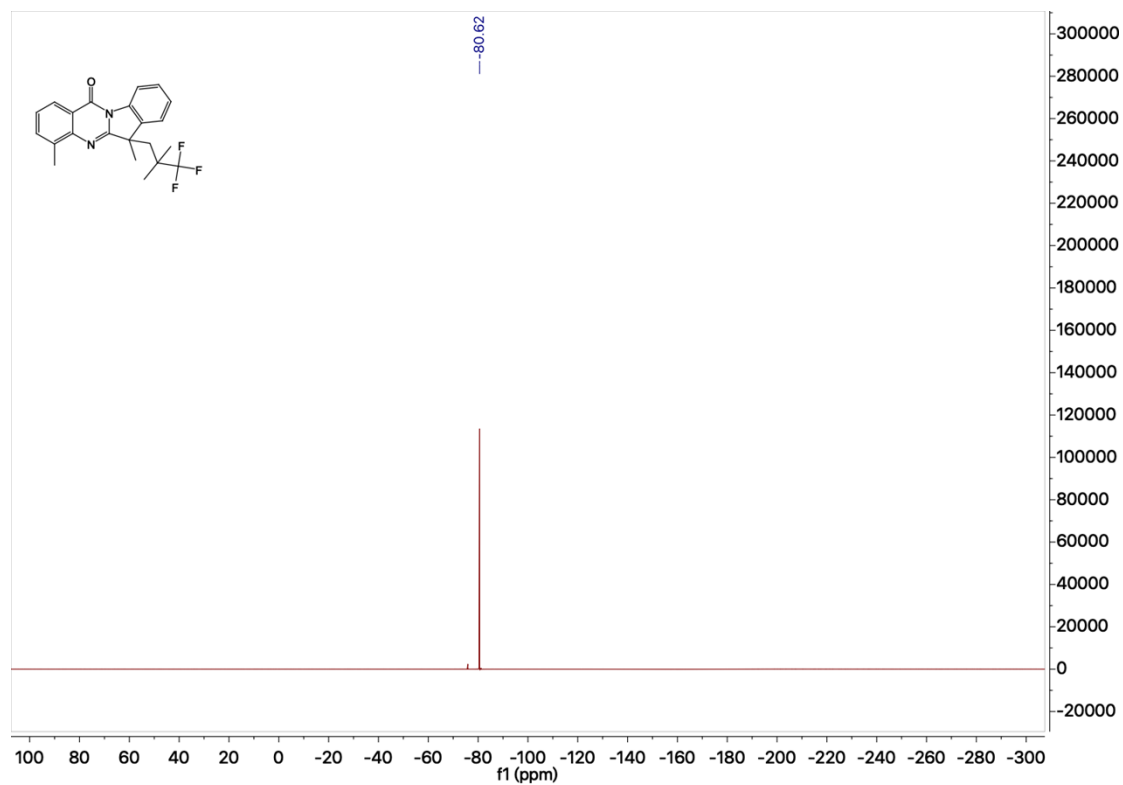

**3a1**  $^1\text{H}$  Chloroform-*d*, 400 MHz

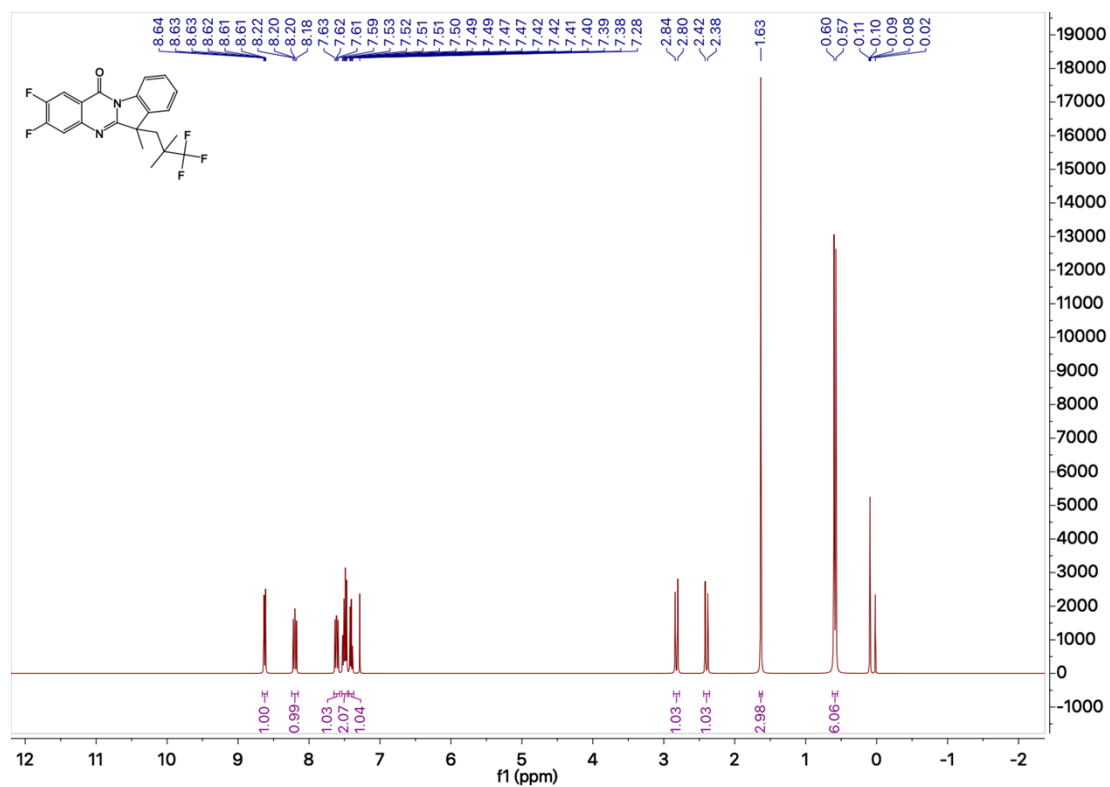

**3a1**  $^{13}\text{C}$  Chloroform-*d*, 101 MHz

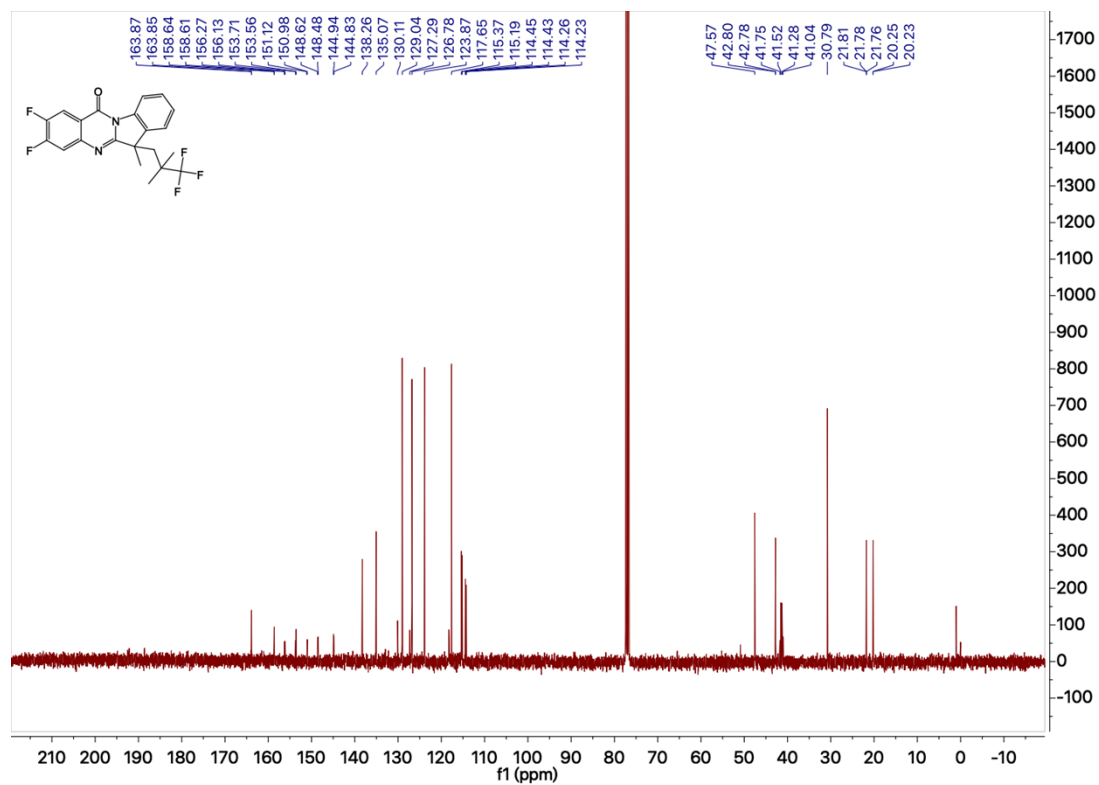



**3a1**  $^{19}\text{F}$  Chloroform-*d*, 376 MHz

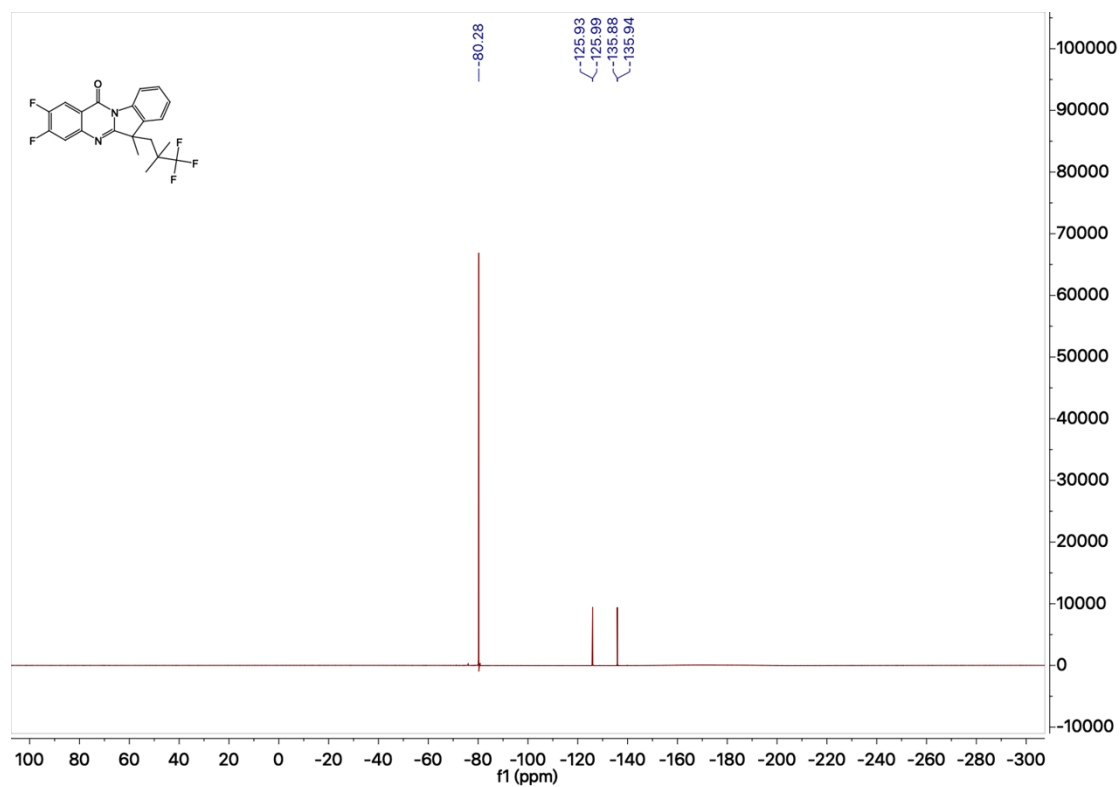

**3am**  $^1\text{H}$  Chloroform-*d*, 400 MHz

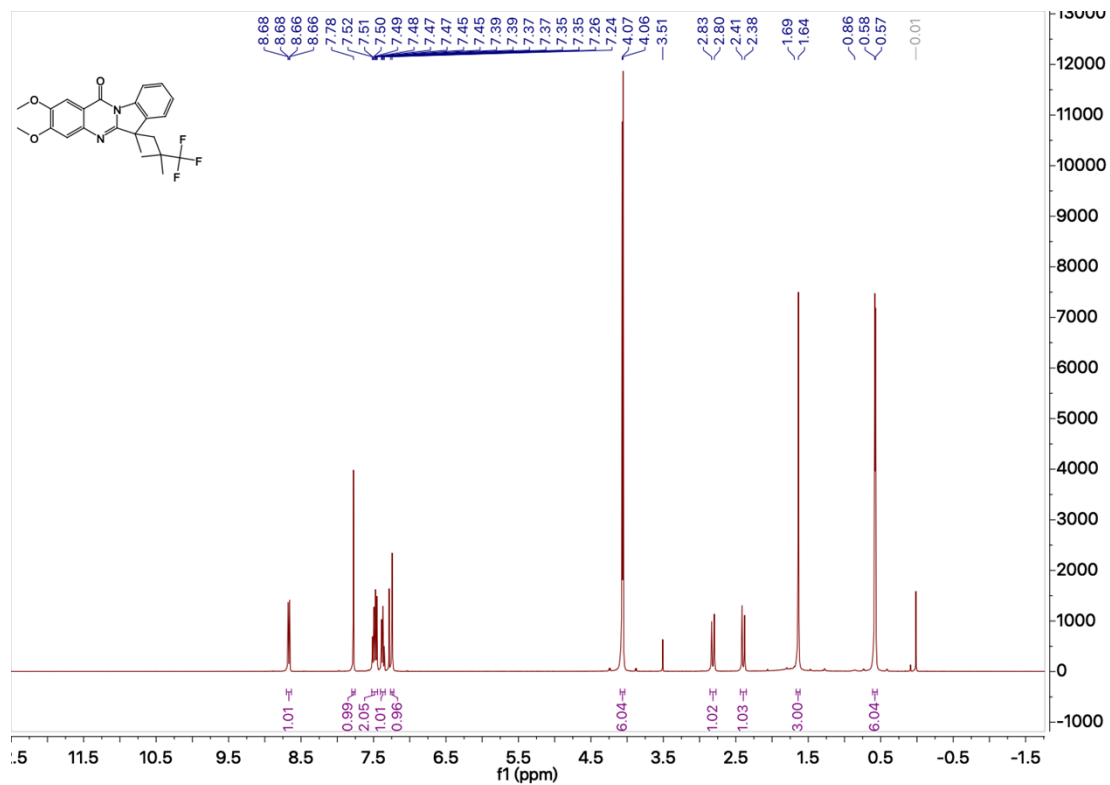

**3am**  $^{13}\text{C}$  Chloroform-*d*, 101 MHz

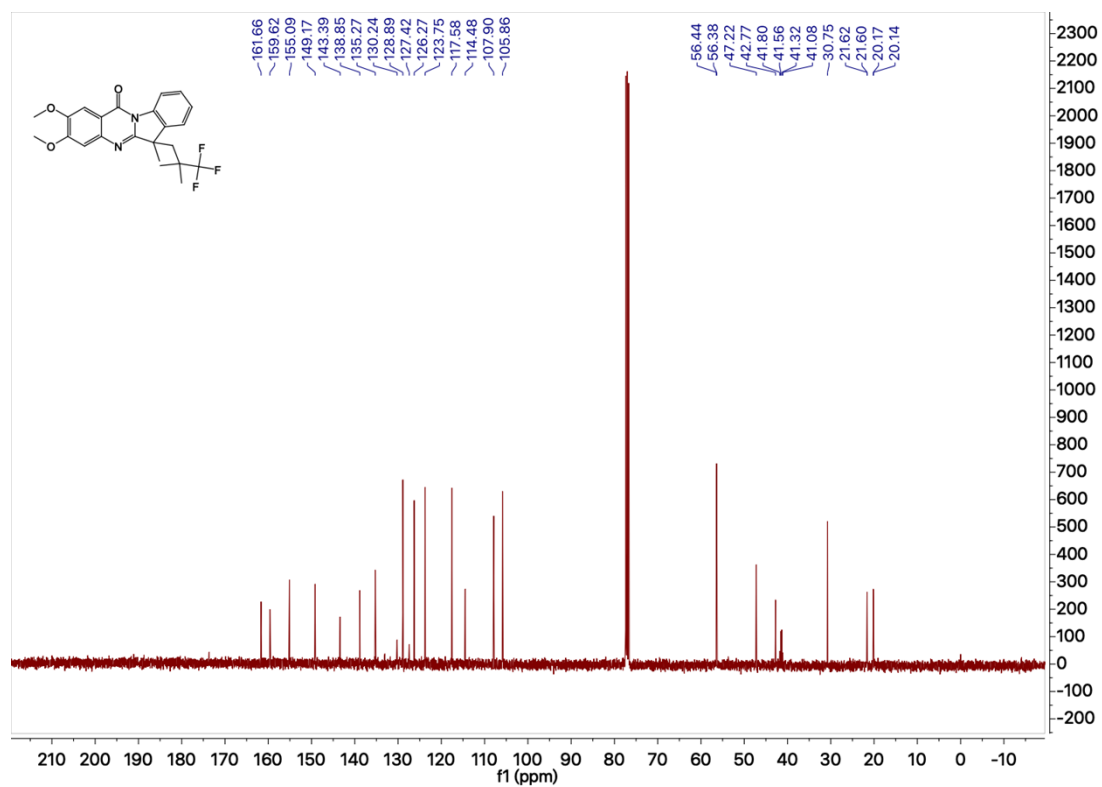

**3am**  $^{19}\text{F}$  Chloroform-*d*, 376 MHz

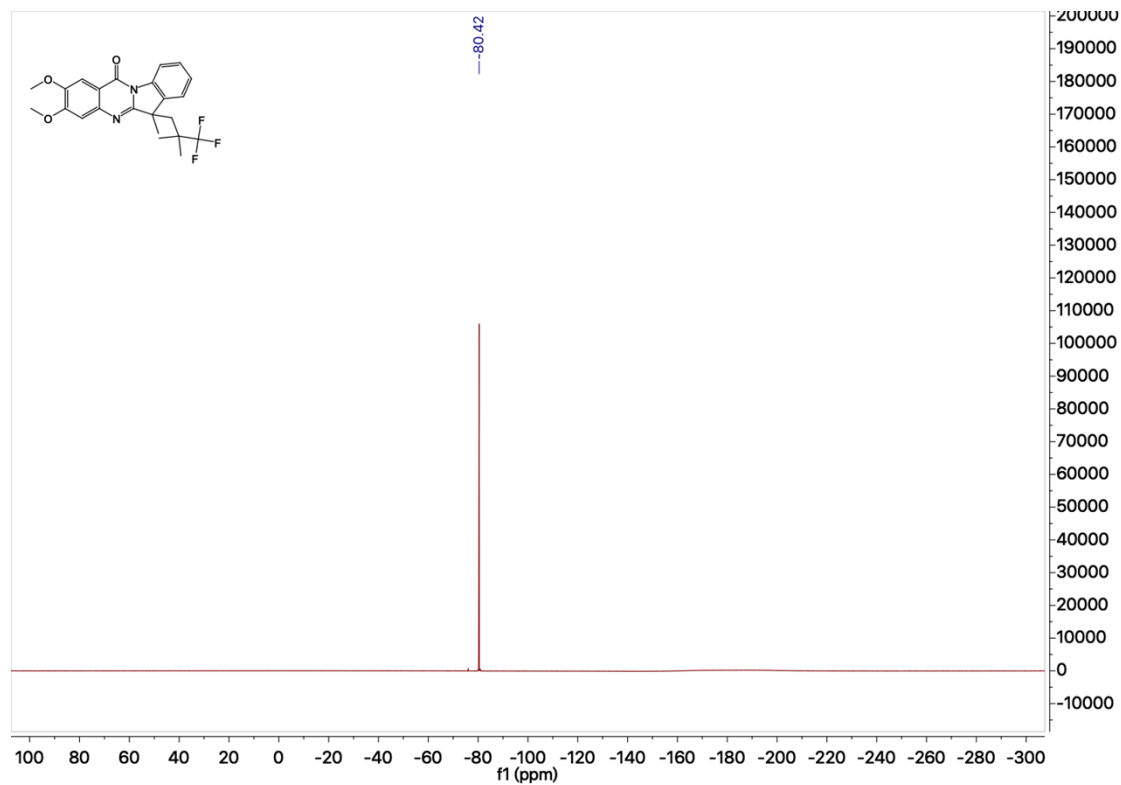

**3an**  $^1\text{H}$  Chloroform-*d*, 400 MHz

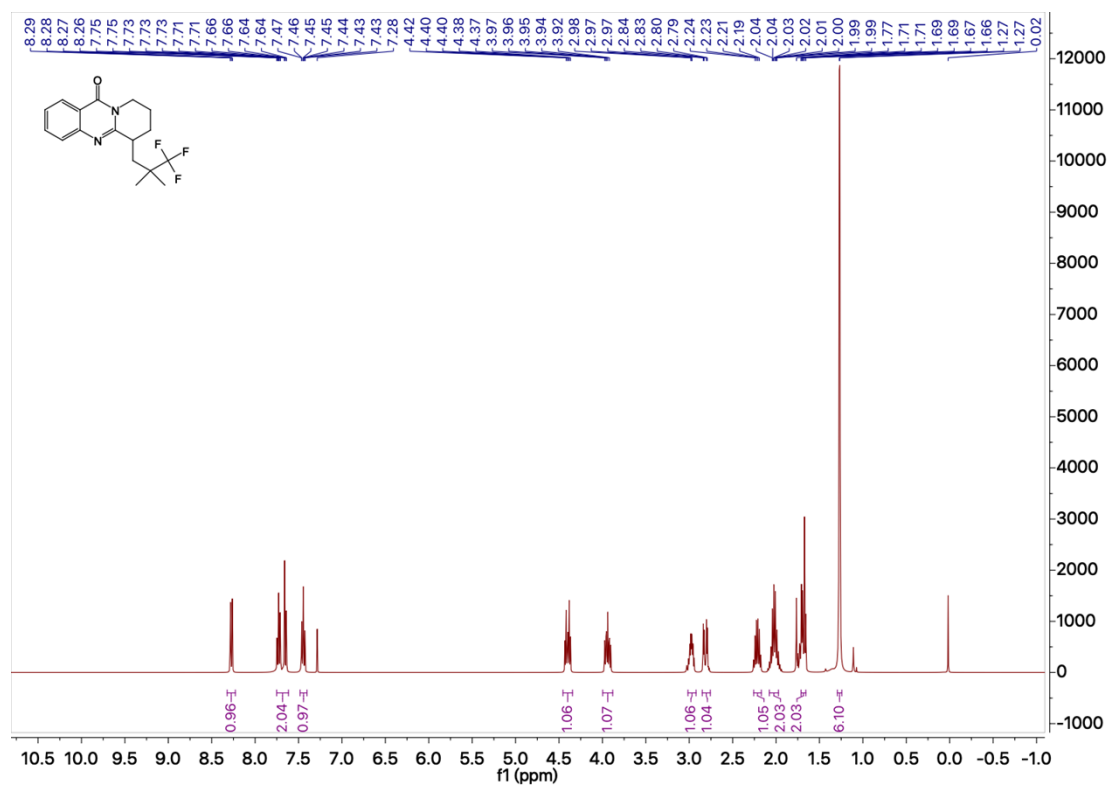

**3an**  $^{13}\text{C}$  Chloroform-*d*, 101 MHz

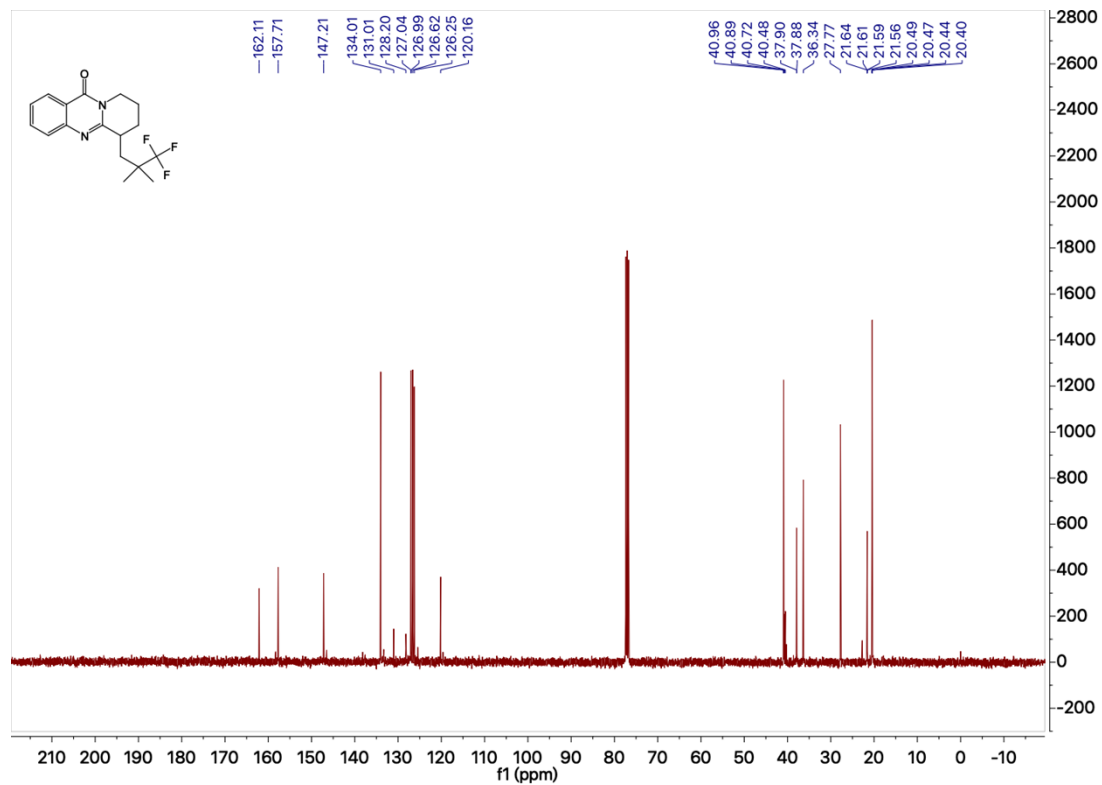

**3an**  $^{19}\text{F}$  Chloroform-*d*, 376 MHz

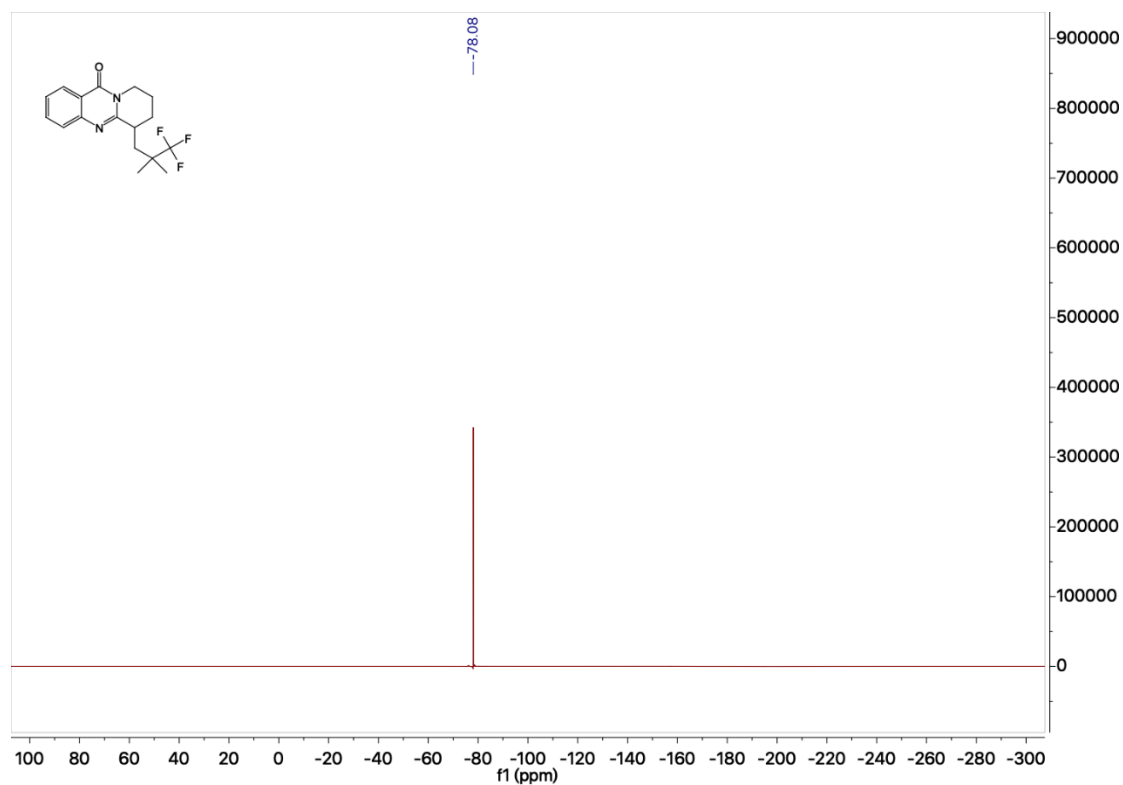

**3ar**  $^1\text{H}$  Chloroform-*d*, 400 MHz

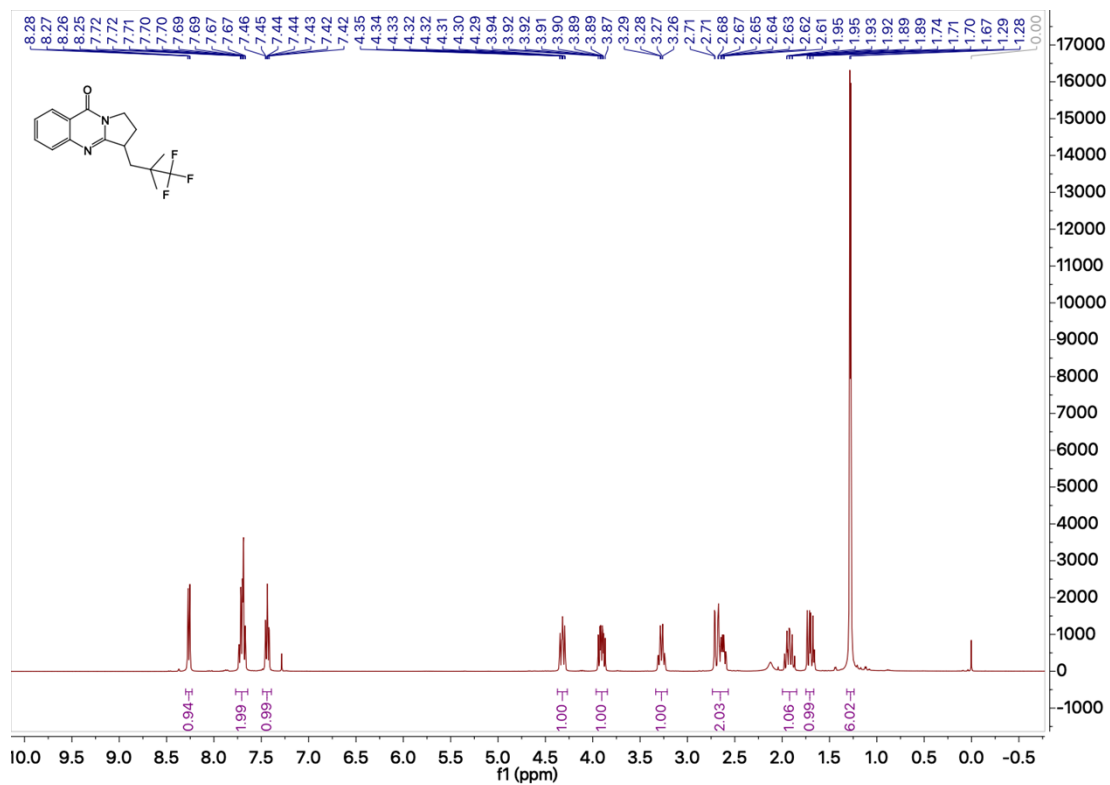

**3ar**  $^{13}\text{C}$  Chloroform-*d*, 101 MHz

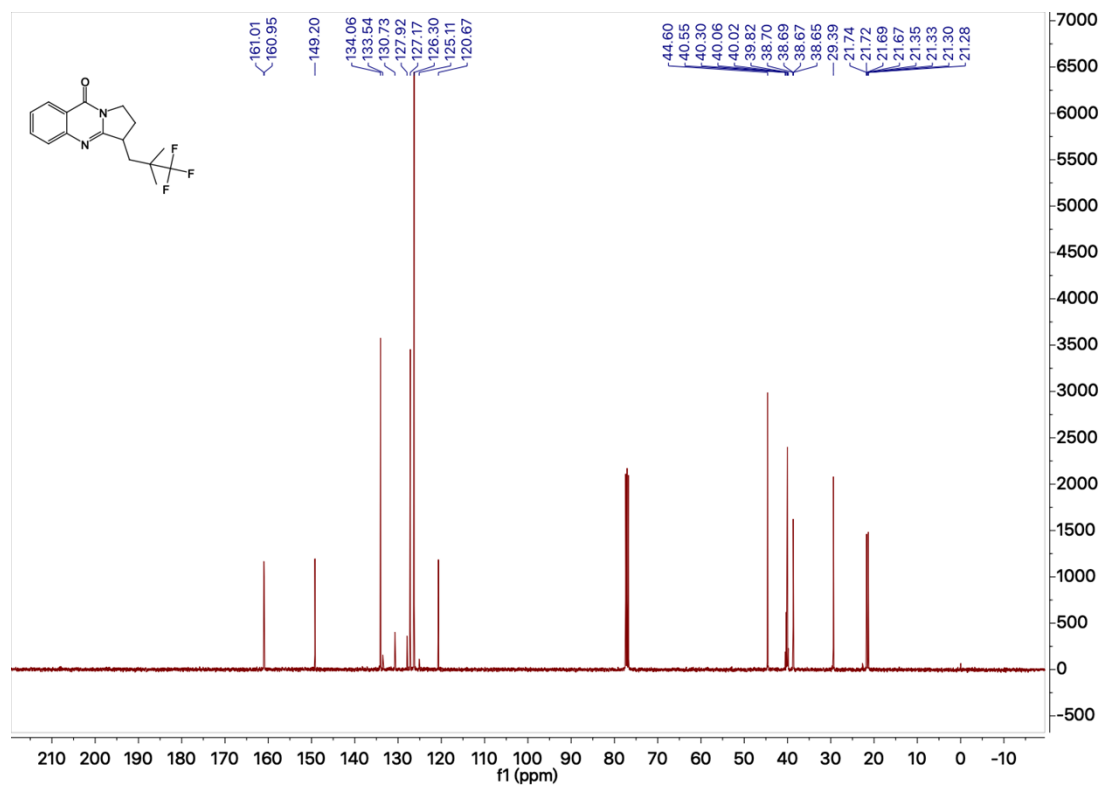

**3ar**  $^{19}\text{F}$  Chloroform-*d*, 376 MHz

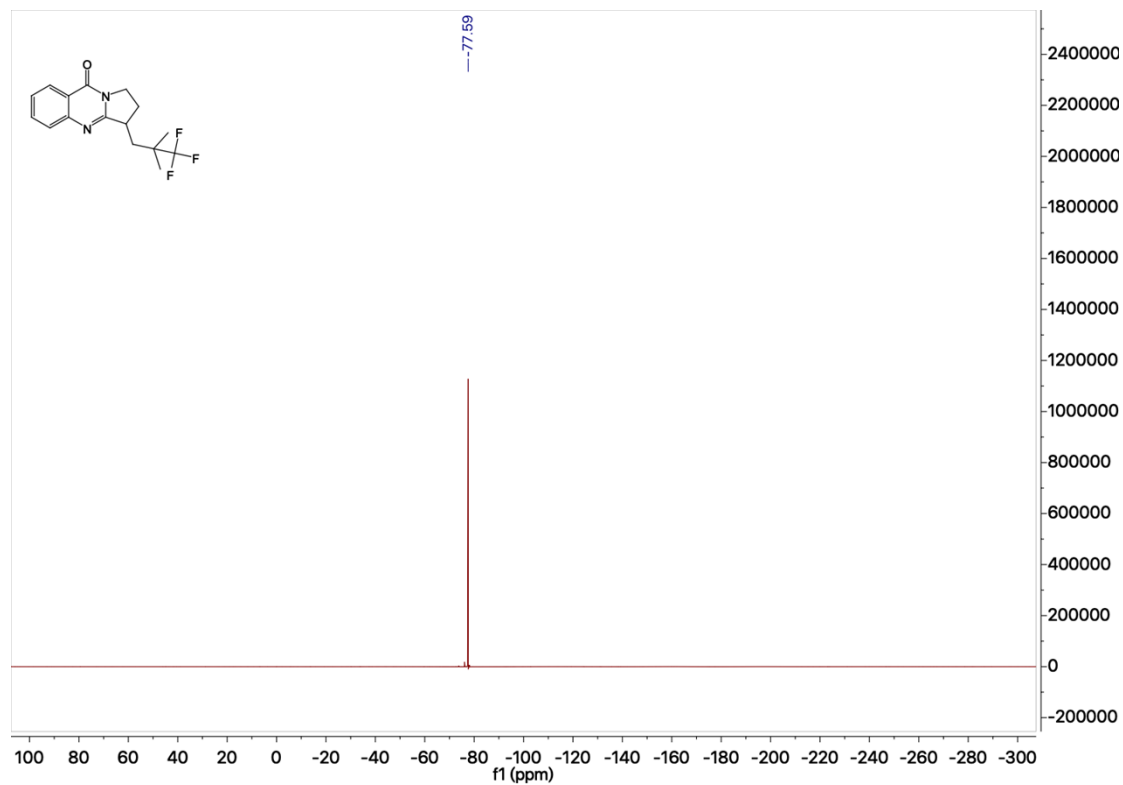

**3ba** <sup>1</sup>H Chloroform-*d*, 400 MHz

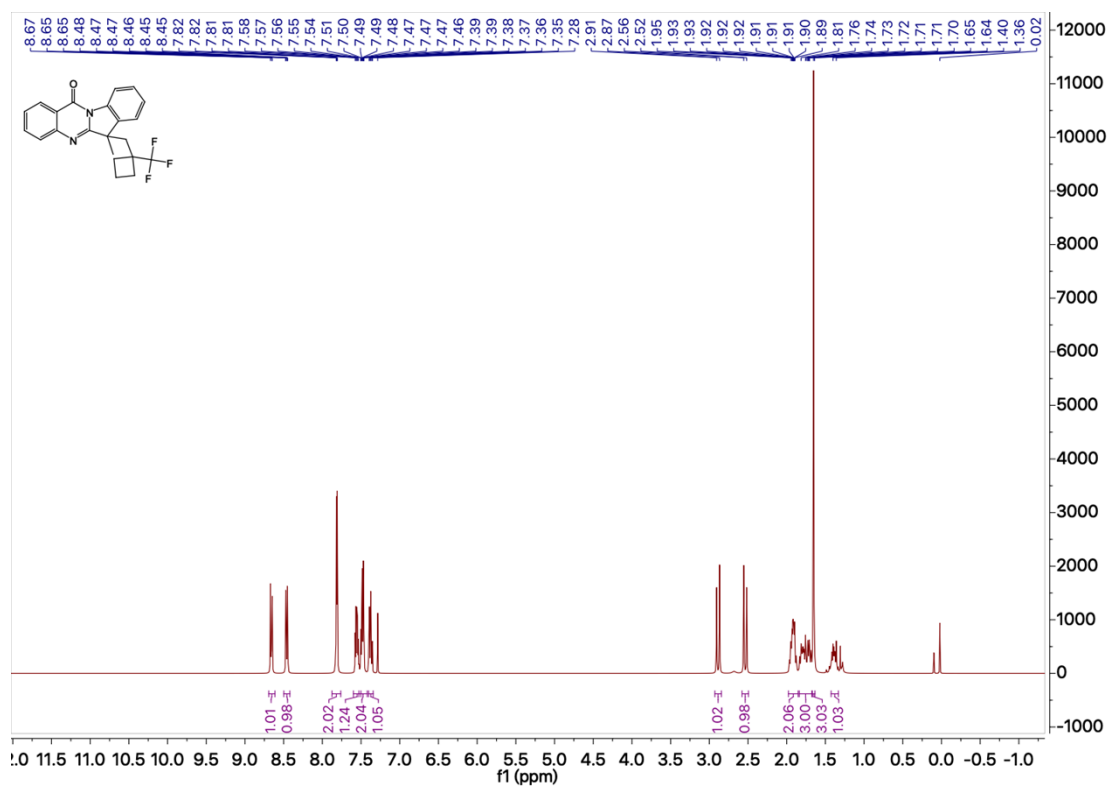

**3ba** <sup>13</sup>C Chloroform-*d*, 101 MHz

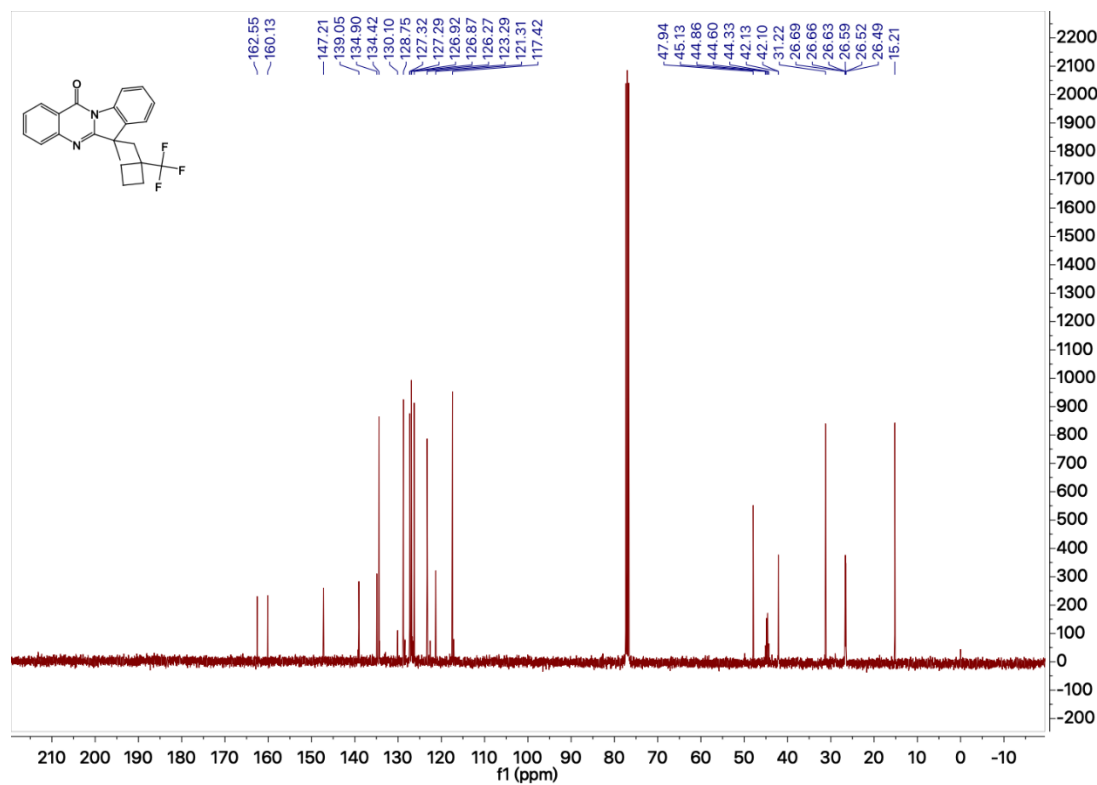

**3ba**  $^{19}\text{F}$  Chloroform-*d*, 376 MHz

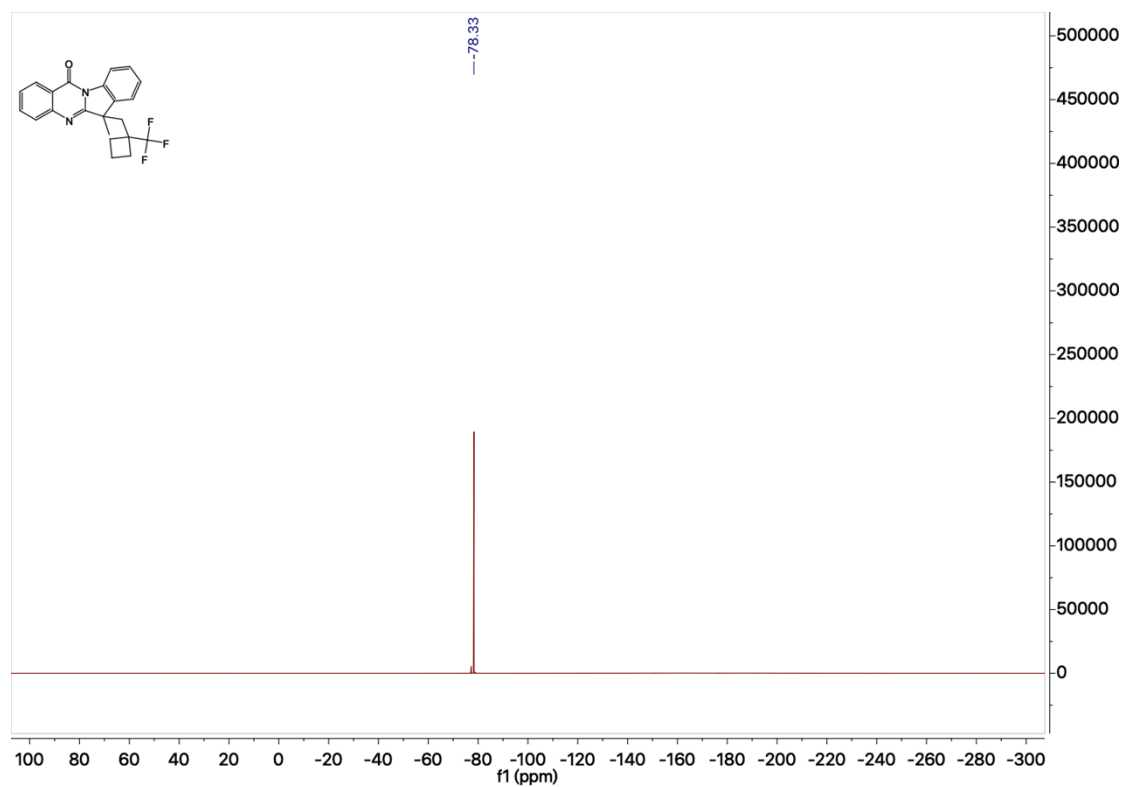

**3ca**  $^1\text{H}$  Chloroform-*d*, 400 MHz

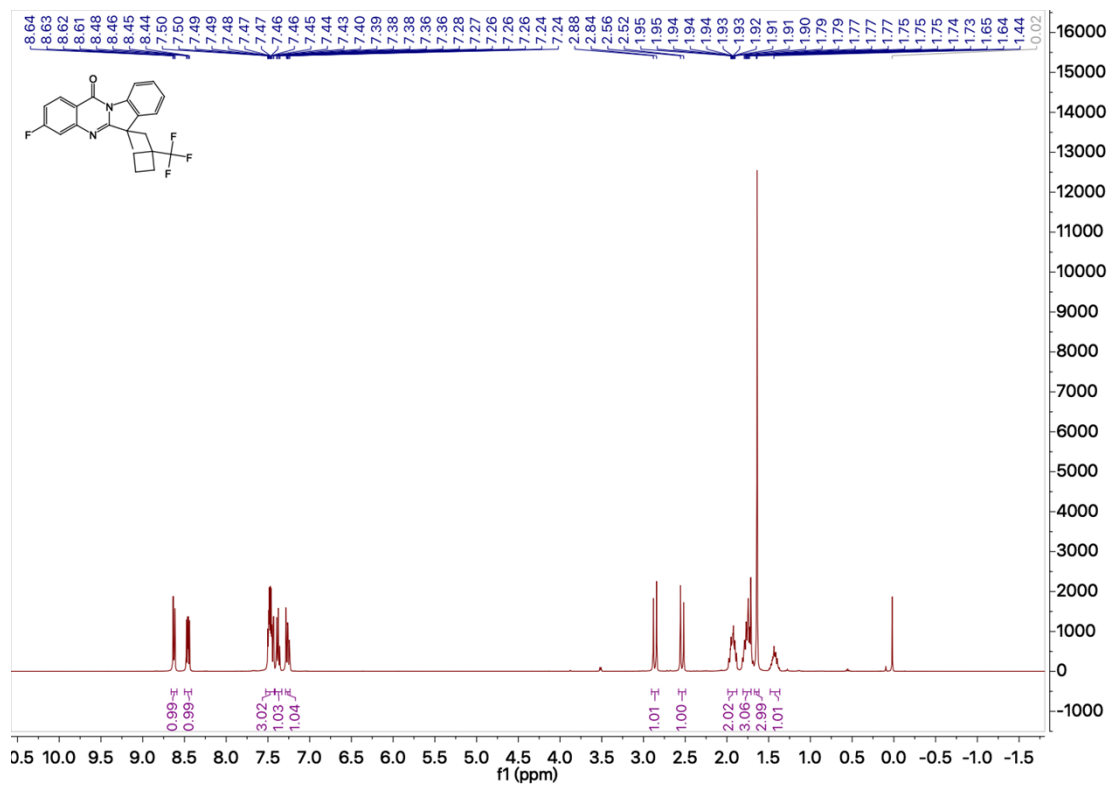

**3ca**  $^{13}\text{C}$  Chloroform-*d*, 101 MHz

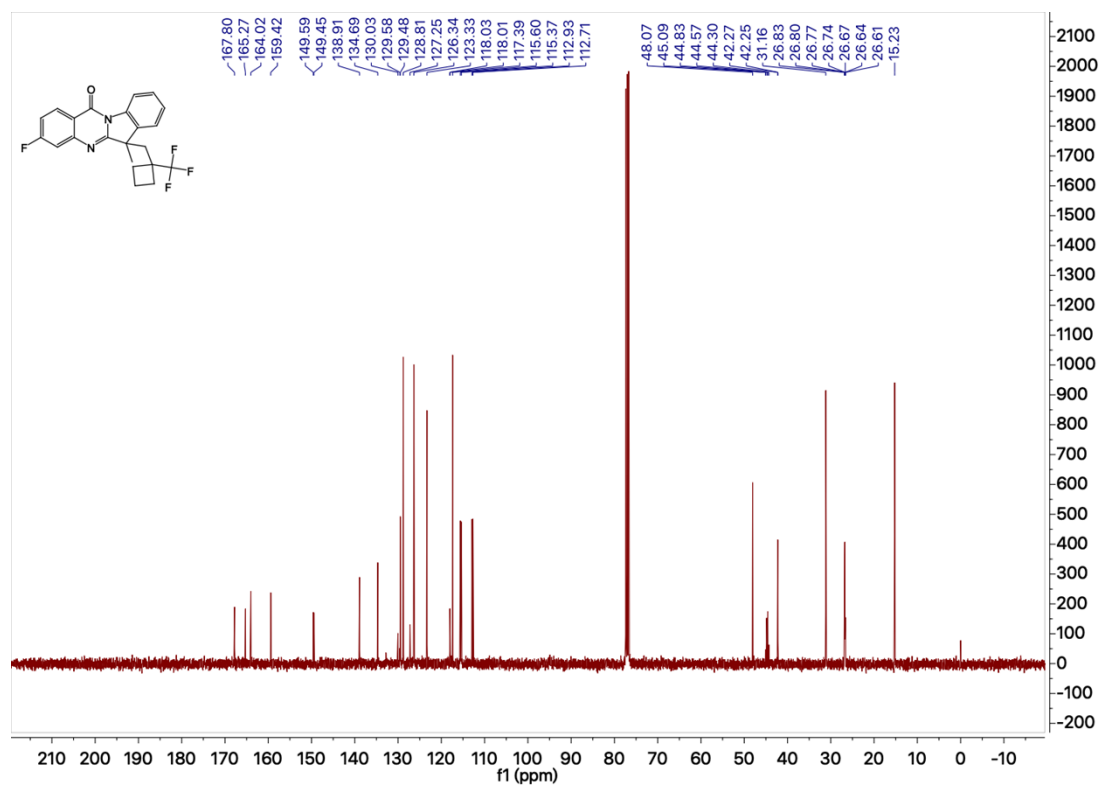

**3ca**  $^{19}\text{F}$  Chloroform-*d*, 376 MHz

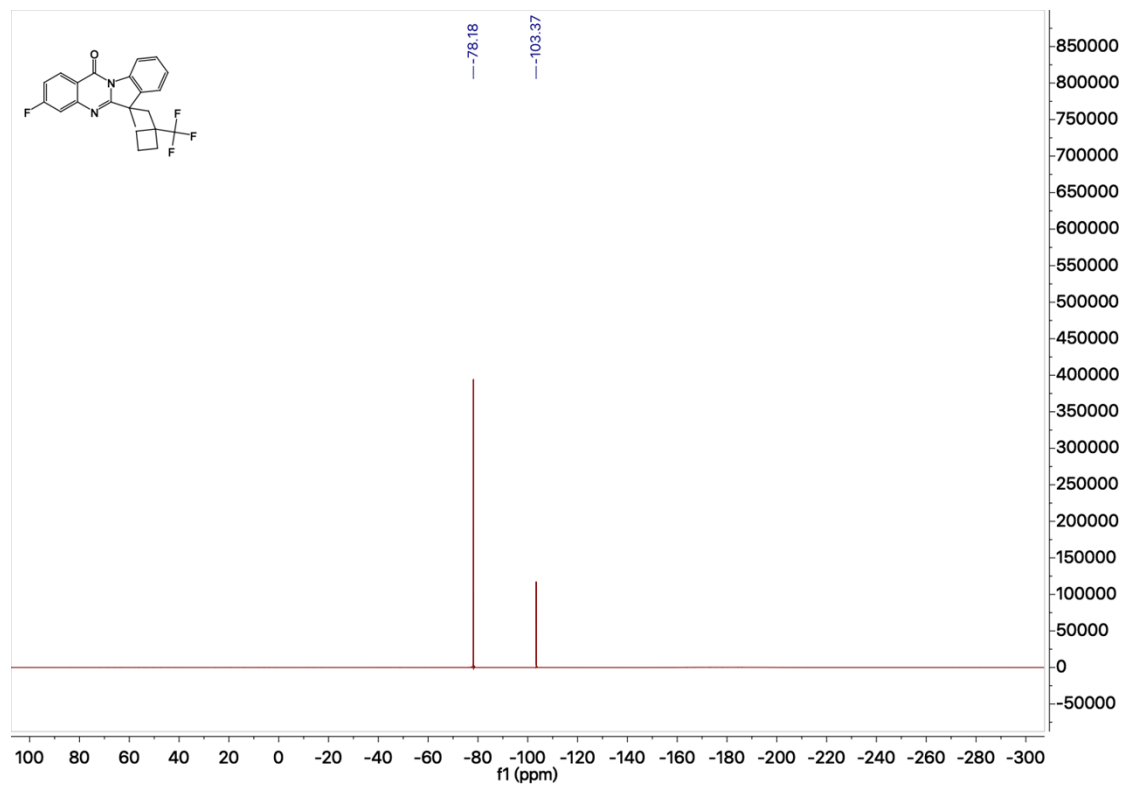



**3da**  $^1\text{H}$  Chloroform-*d*, 400 MHz

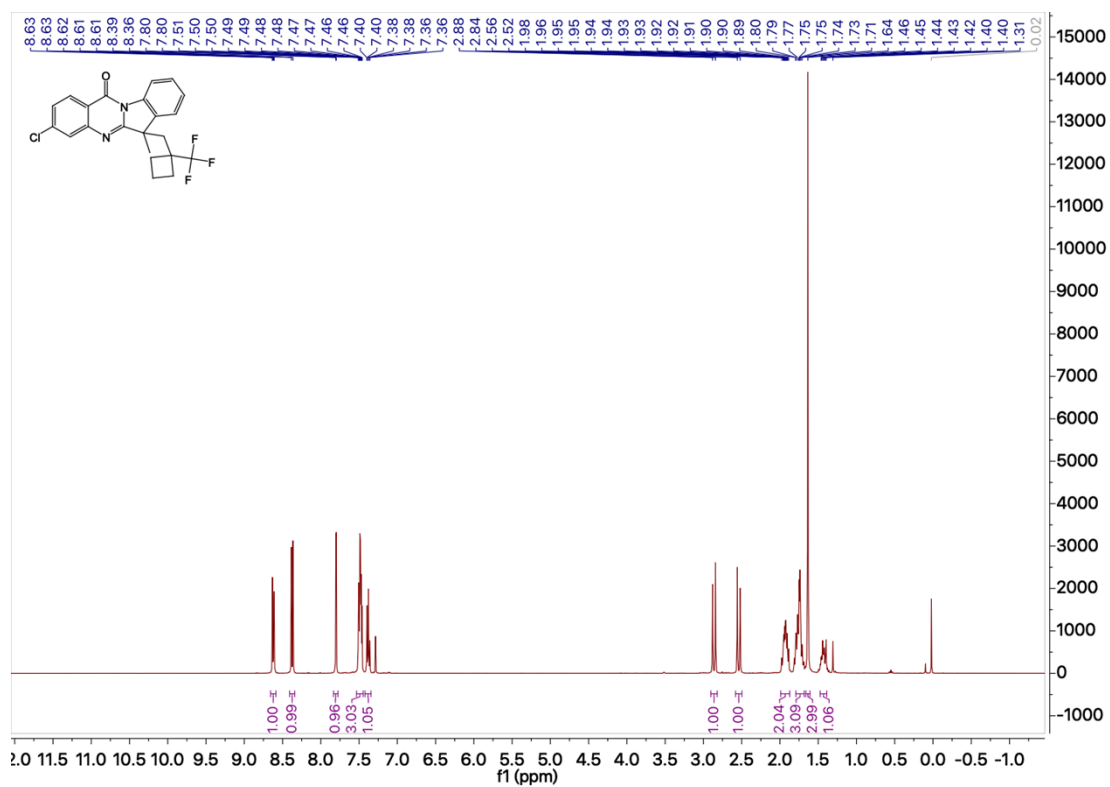

**3da**  $^{13}\text{C}$  Chloroform-*d*, 101 MHz

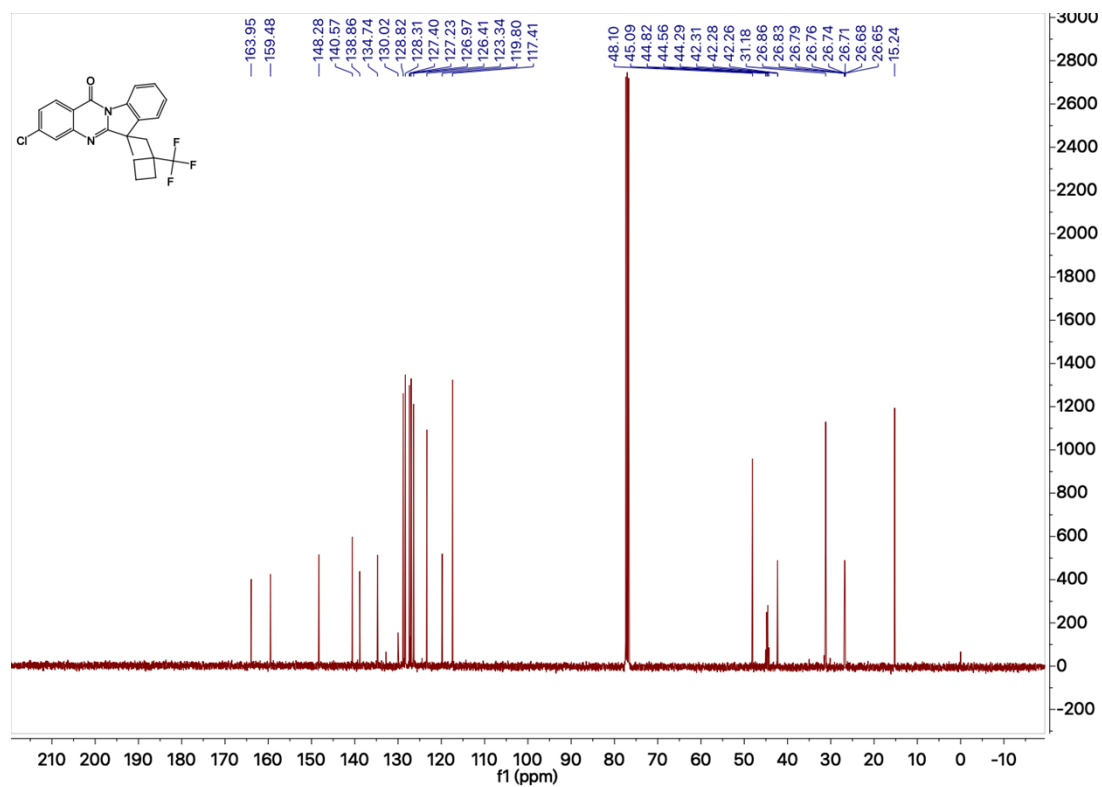

**3da**  $^{19}\text{F}$  Chloroform-*d*, 376 MHz

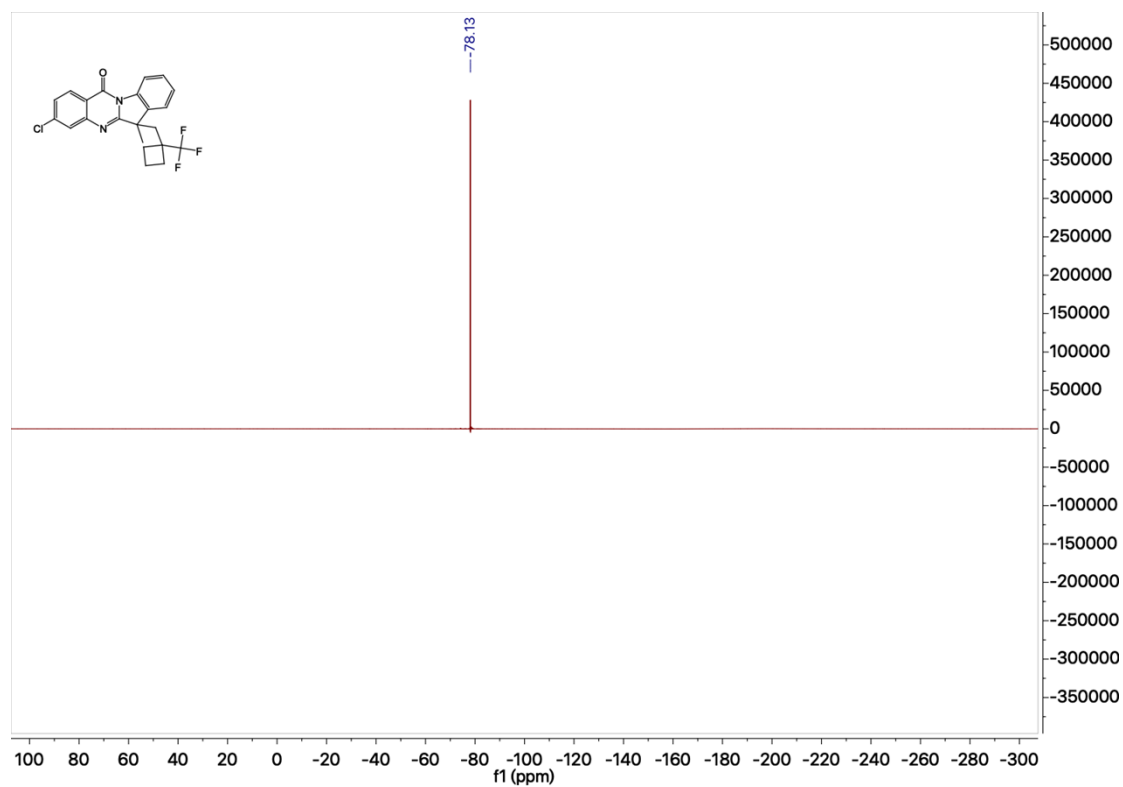

**3ea**  $^1\text{H}$  Chloroform-*d*, 400 MHz

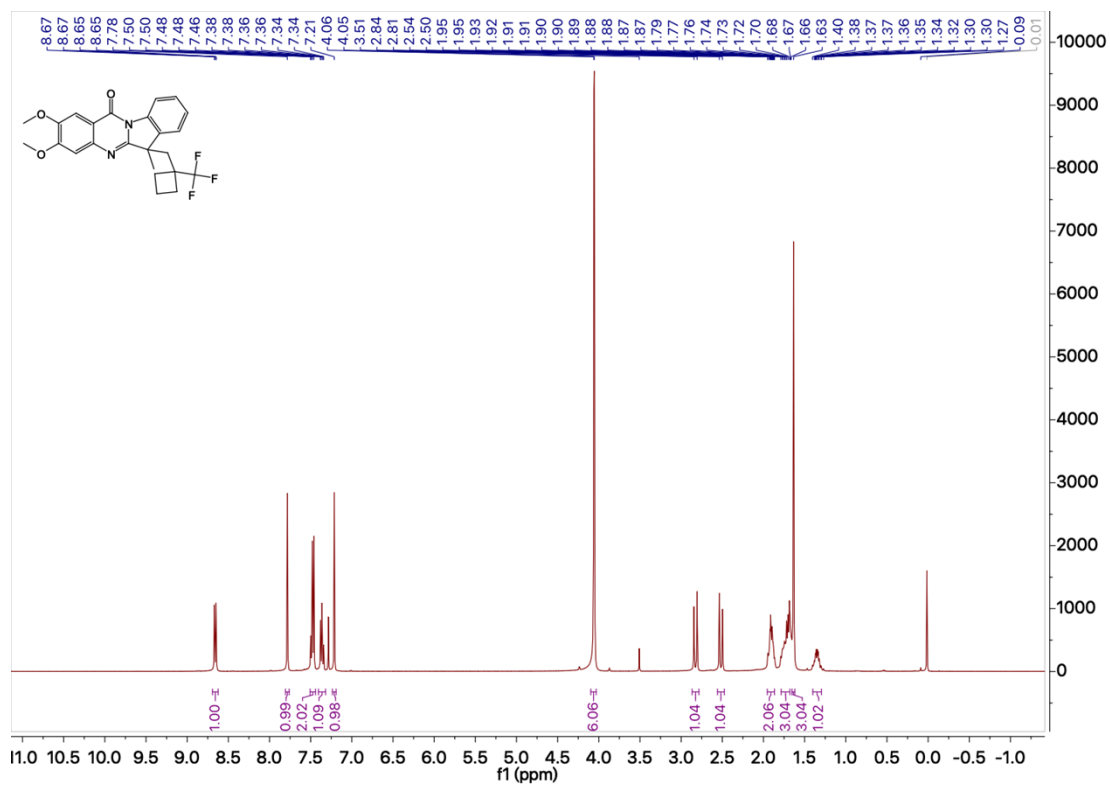

**3ea**  $^{13}\text{C}$  Chloroform-*d*, 101 MHz

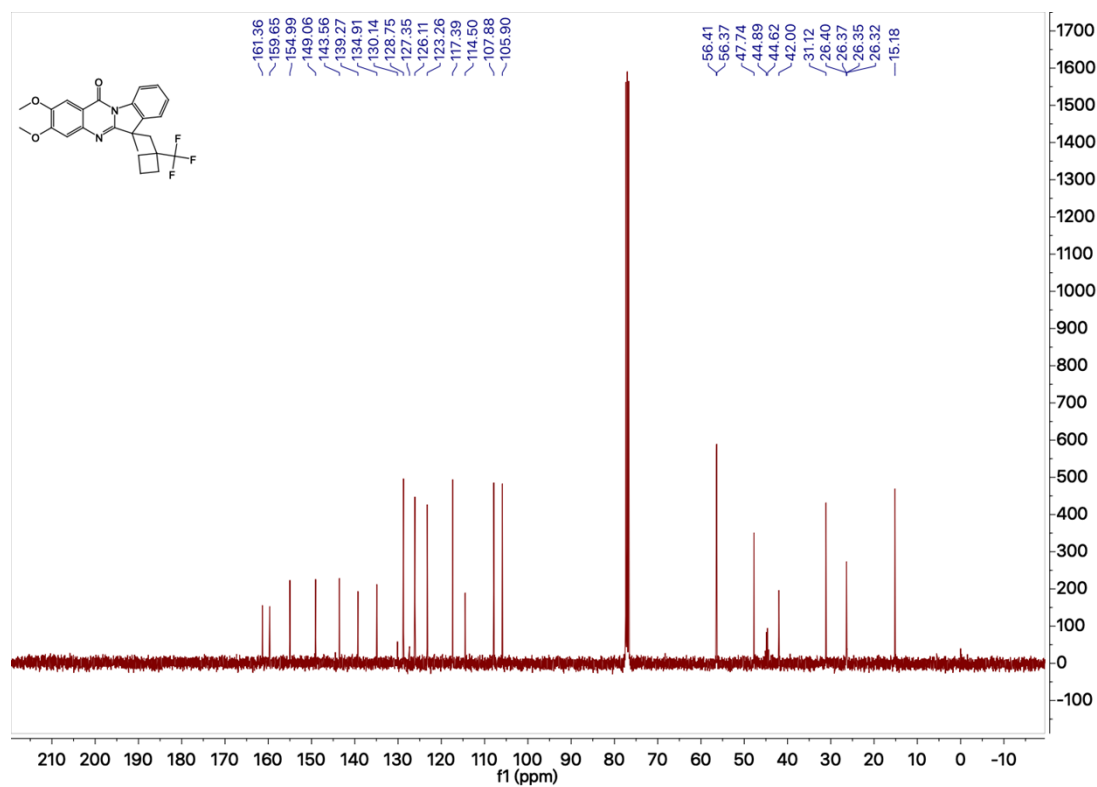

**3ea**  $^{19}\text{F}$  Chloroform-*d*, 376 MHz

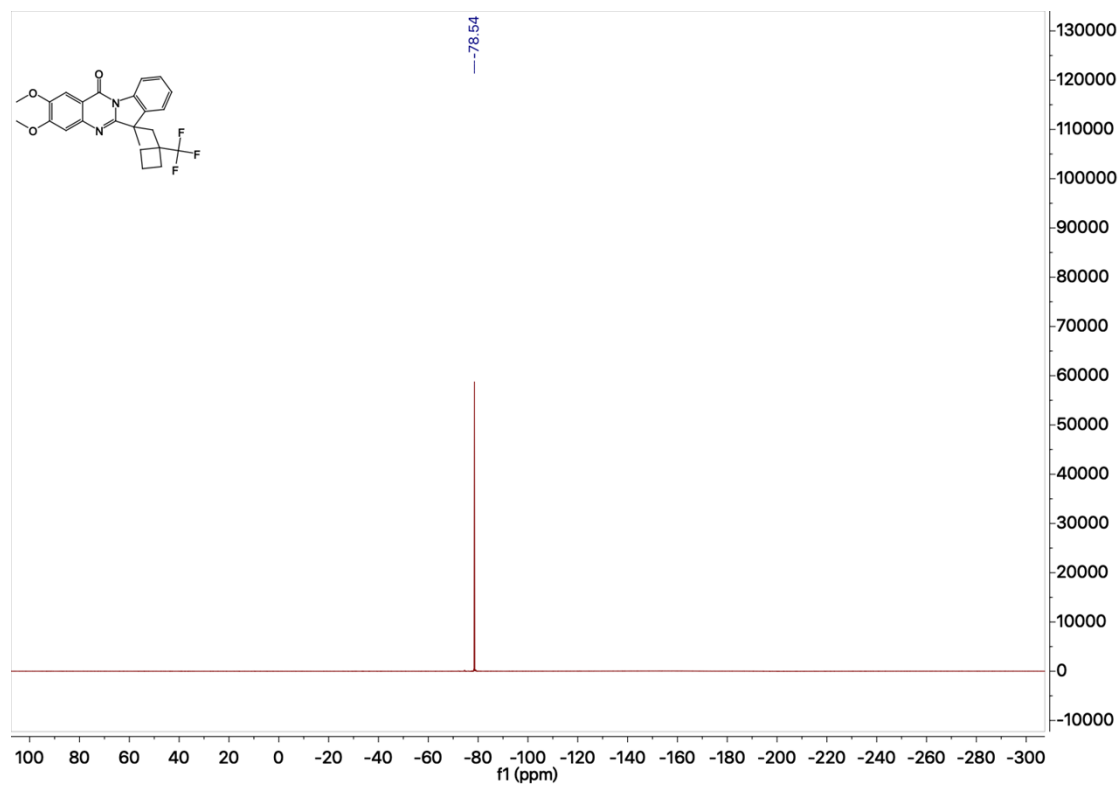

**3fa** <sup>1</sup>H Chloroform-*d*, 400 MHz

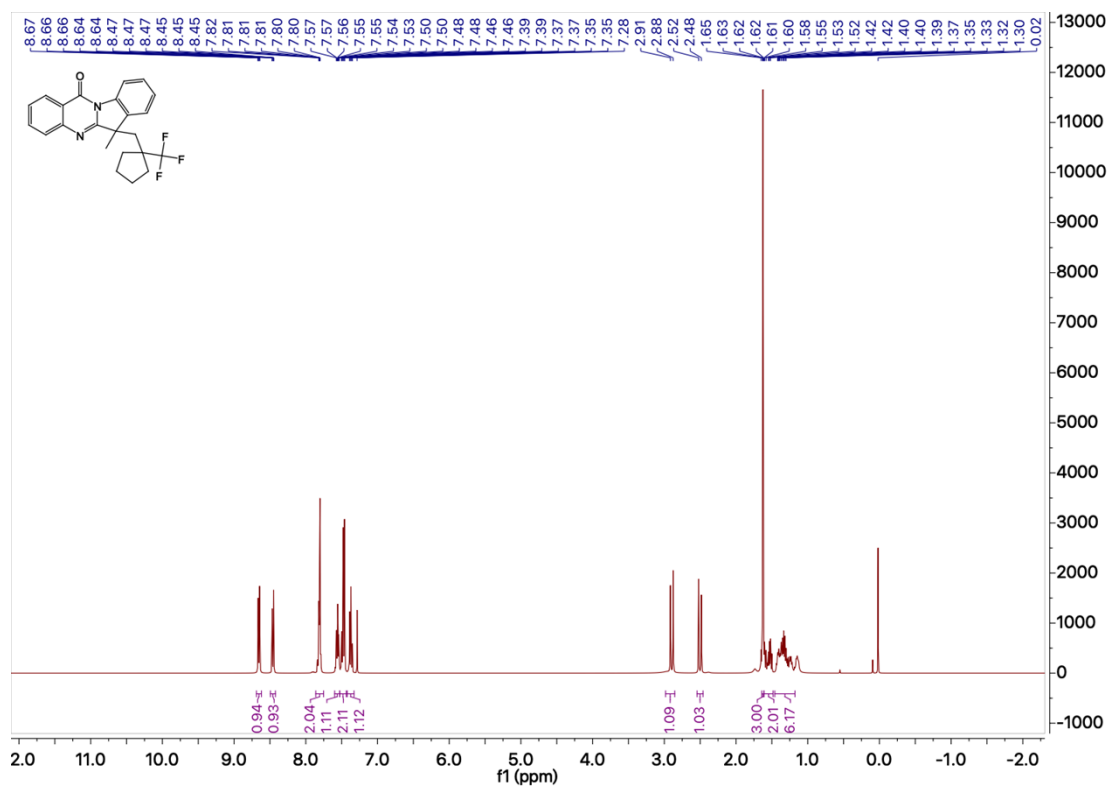

**3fa** <sup>13</sup>C Chloroform-*d*, 101 MHz

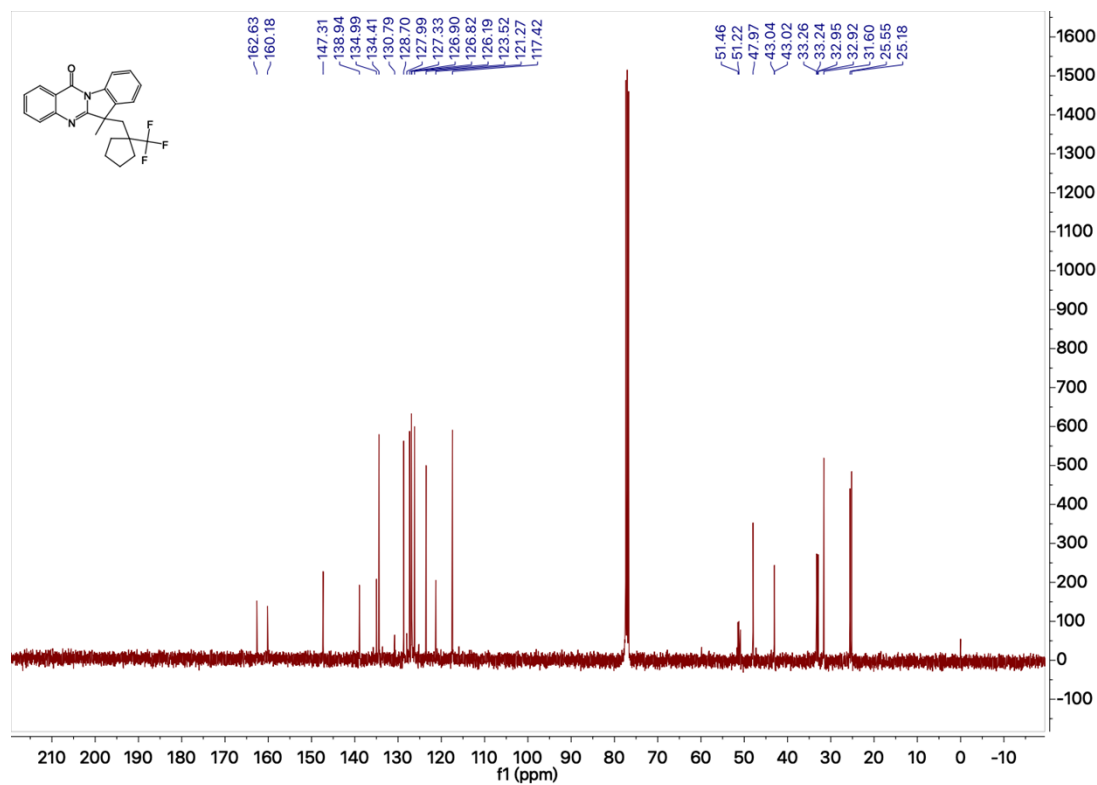

**3fa**  $^{19}\text{F}$  Chloroform-*d*, 376 MHz

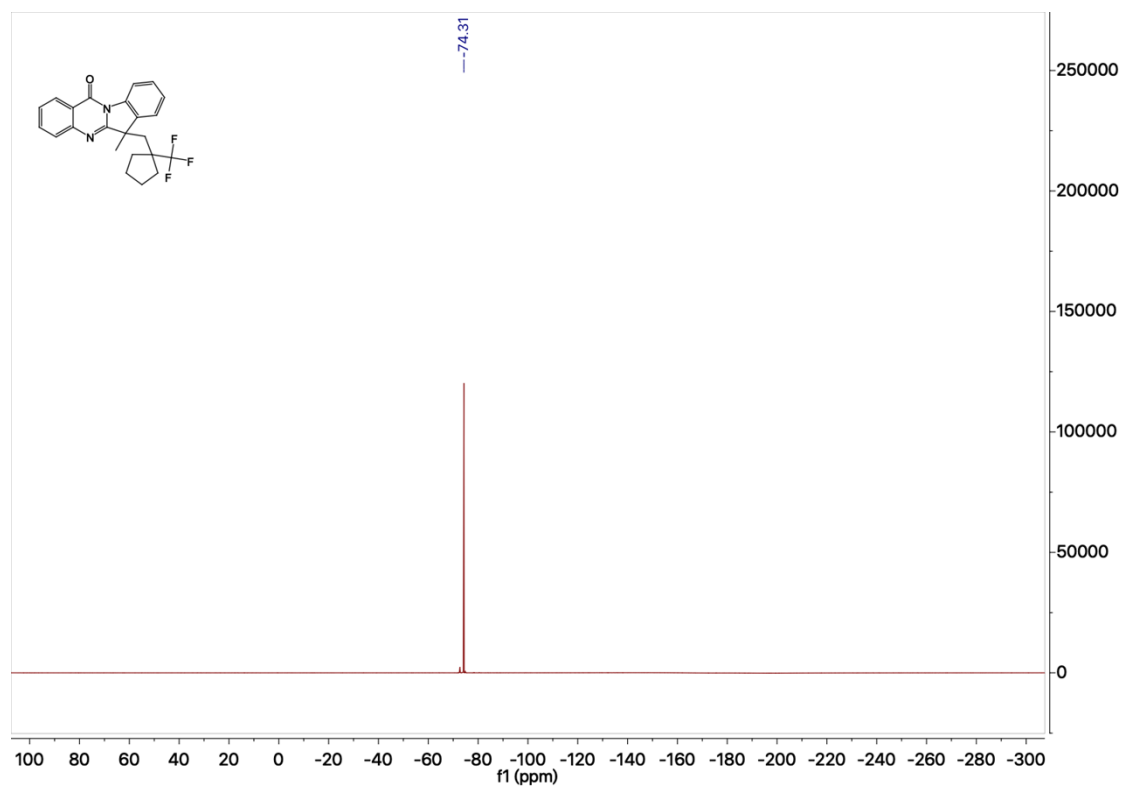

**3ga**  $^1\text{H}$  Chloroform-*d*, 400 MHz

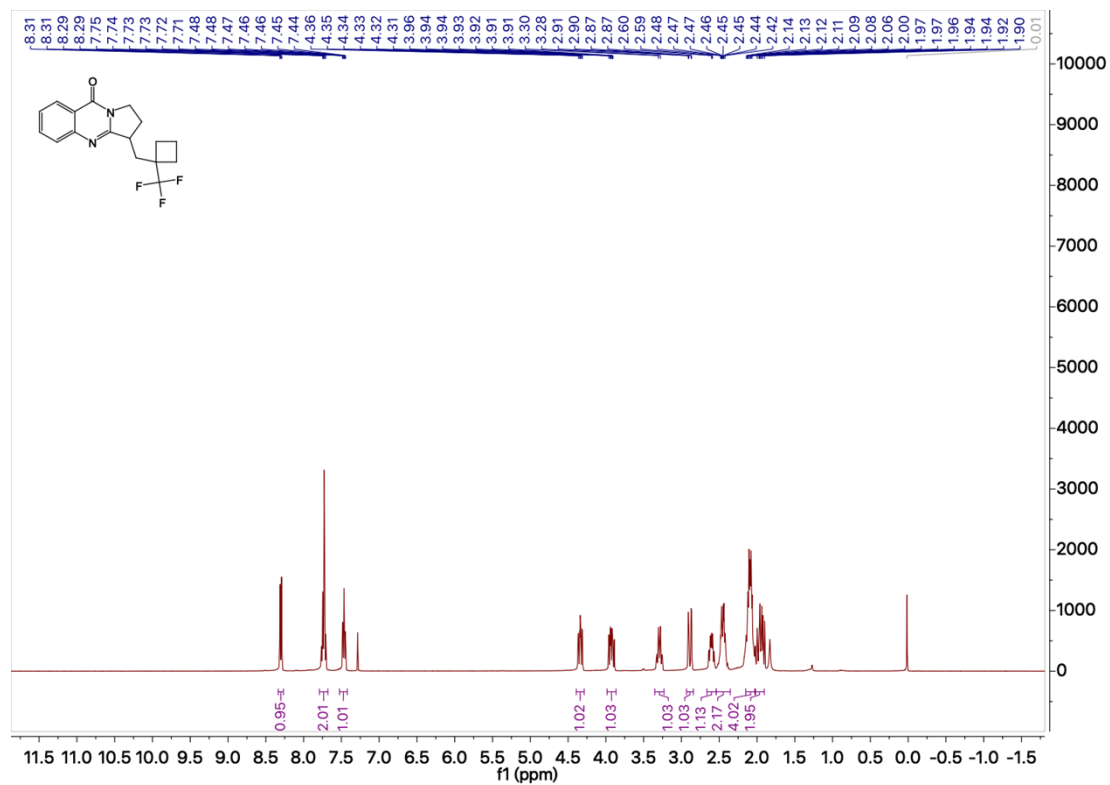

**3ga**  $^{13}\text{C}$  Chloroform-*d*, 101 MHz

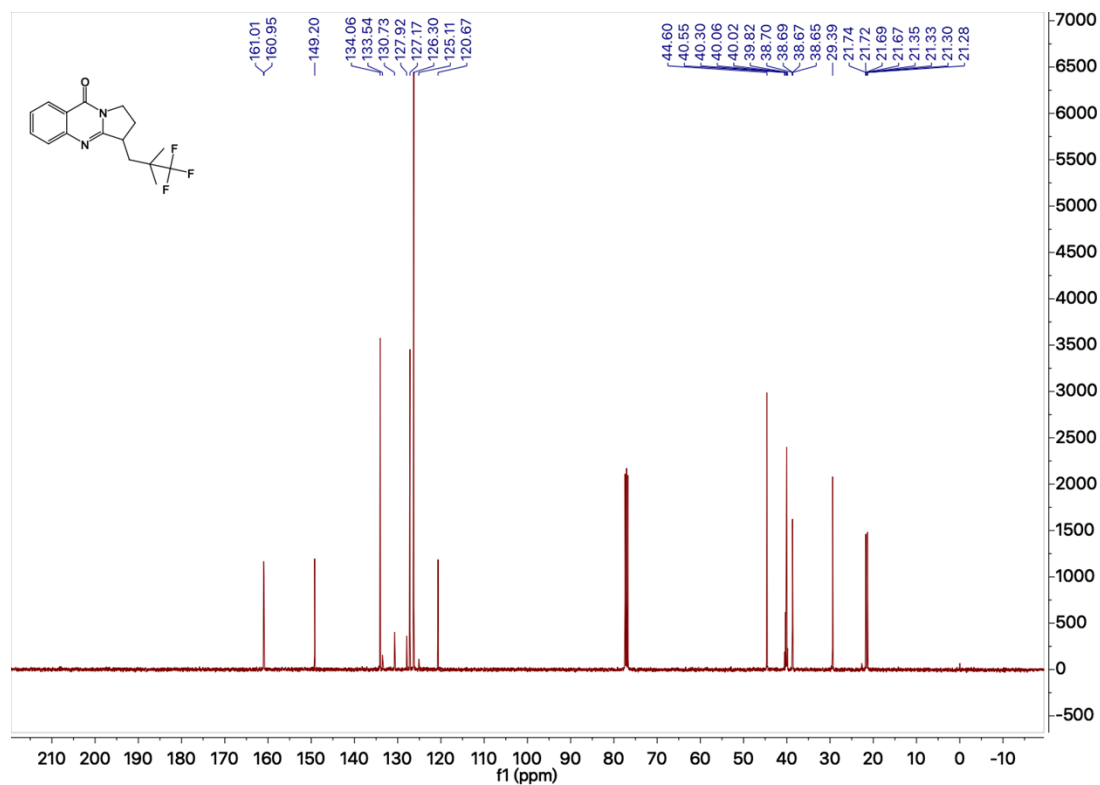

**3ga**  $^{19}\text{F}$  Chloroform-*d*, 376 MHz

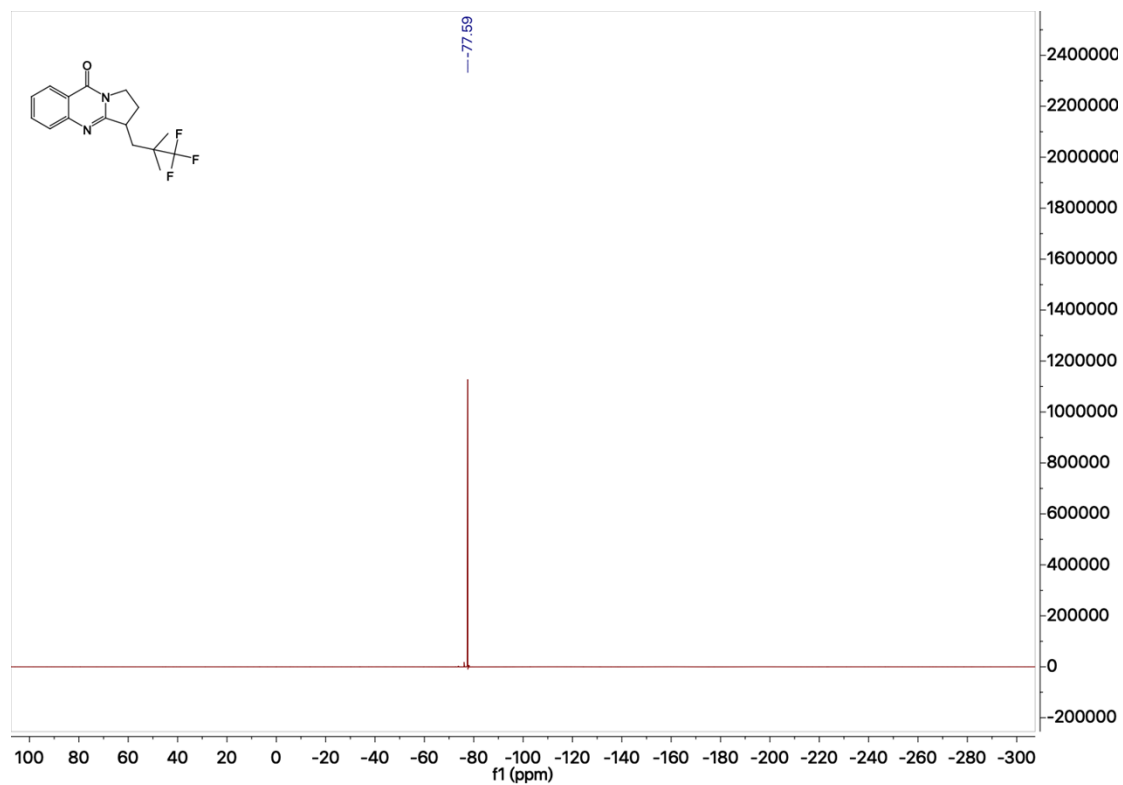

**3ha** <sup>1</sup>H Chloroform-*d*, 400 MHz

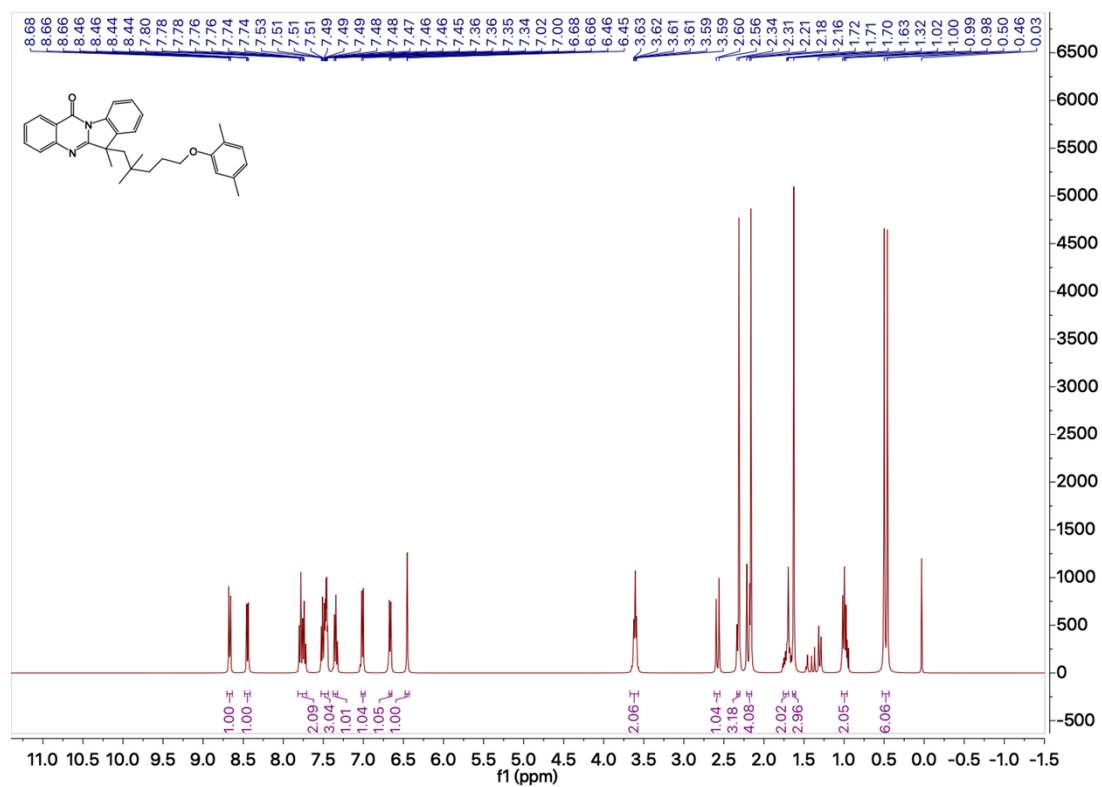

**3ha** <sup>13</sup>C Chloroform-*d*, 101 MHz

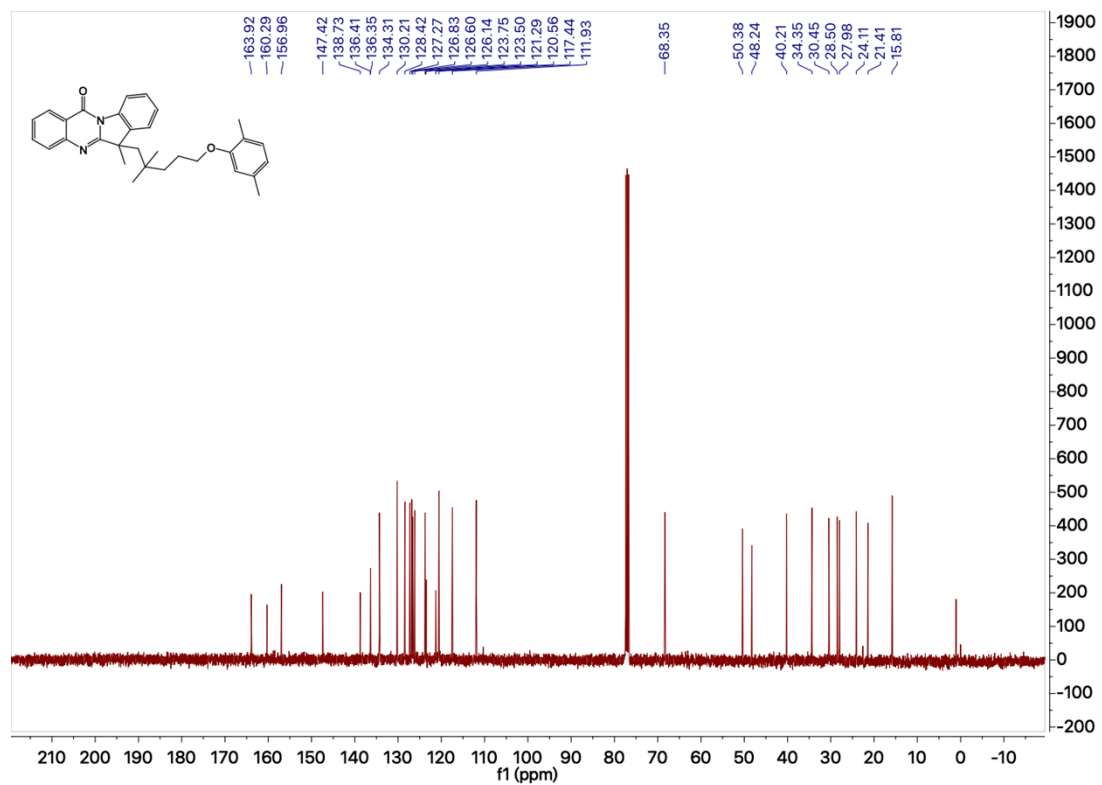

**3ia** <sup>1</sup>H Chloroform-*d*, 400 MHz

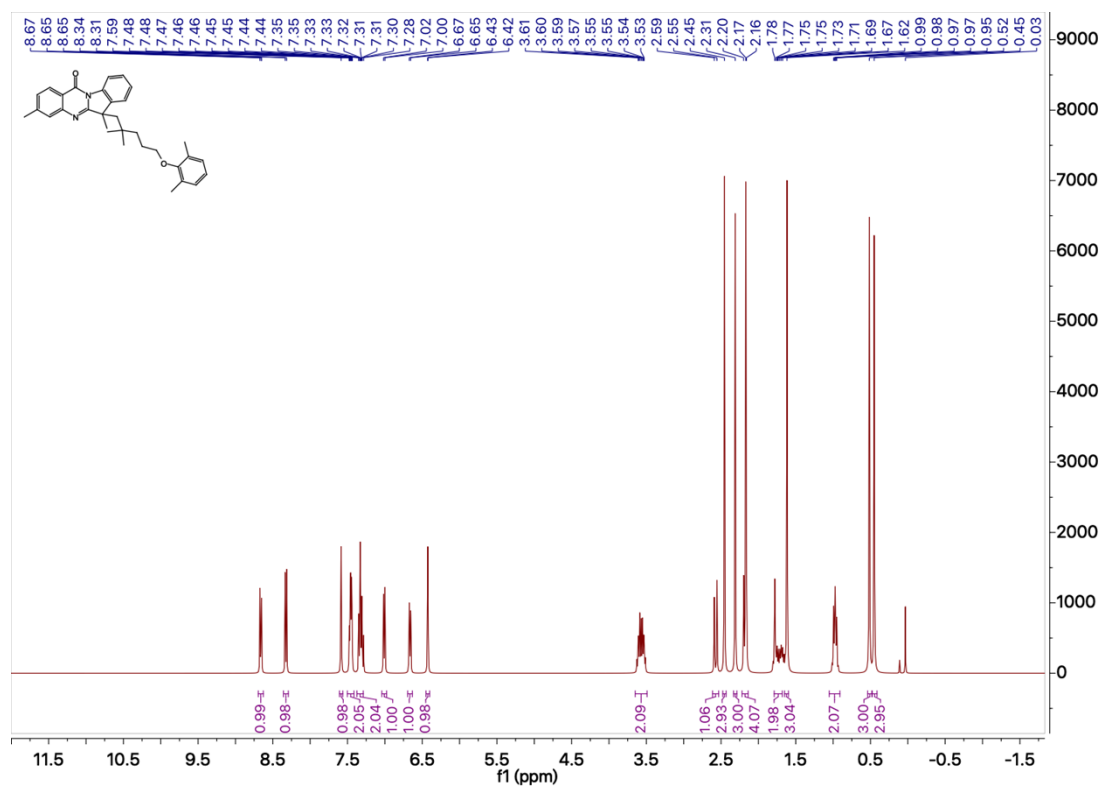

**3ia** <sup>13</sup>C Chloroform-*d*, 101 MHz

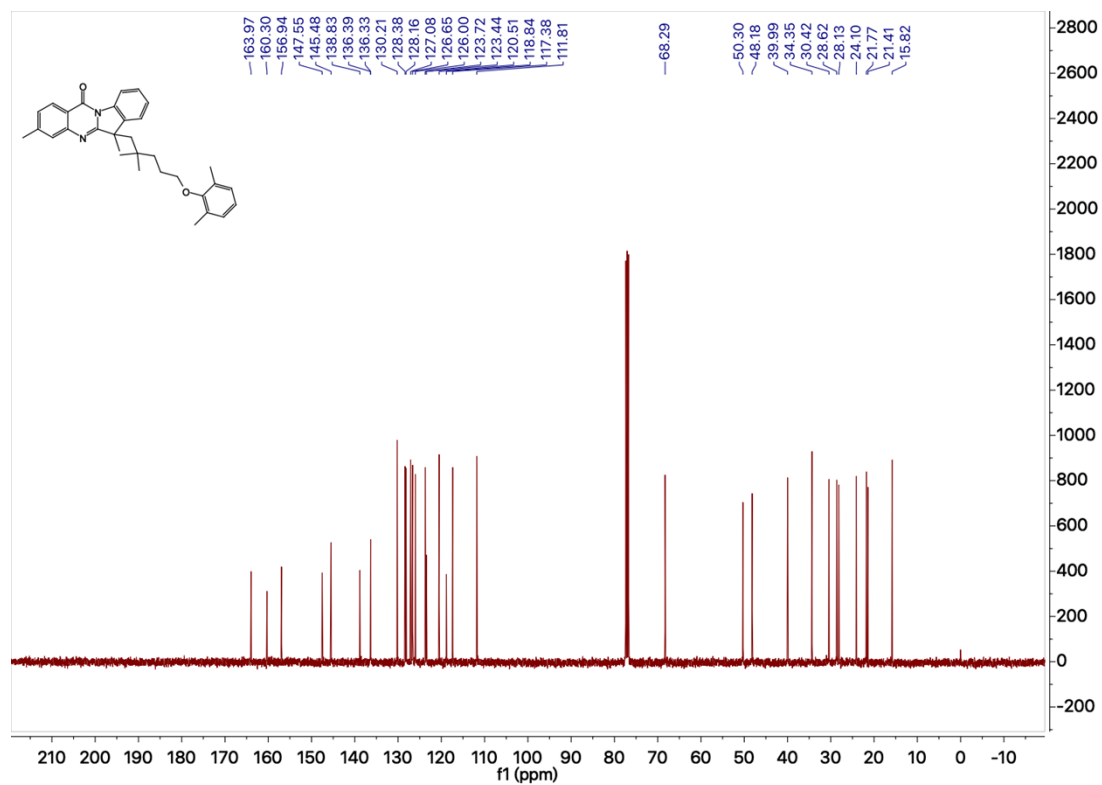



**3ja**  $^1\text{H}$  Chloroform-*d*, 400 MHz

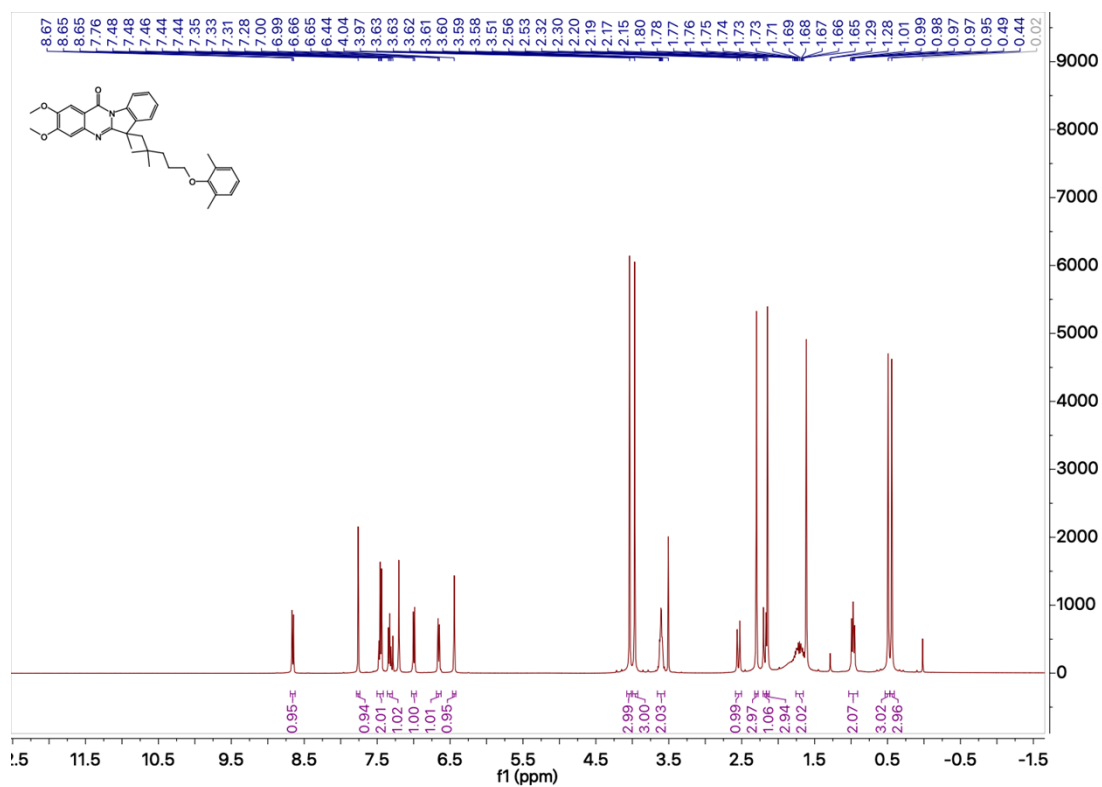

**3ja**  $^{13}\text{C}$  Chloroform-*d*, 101 MHz

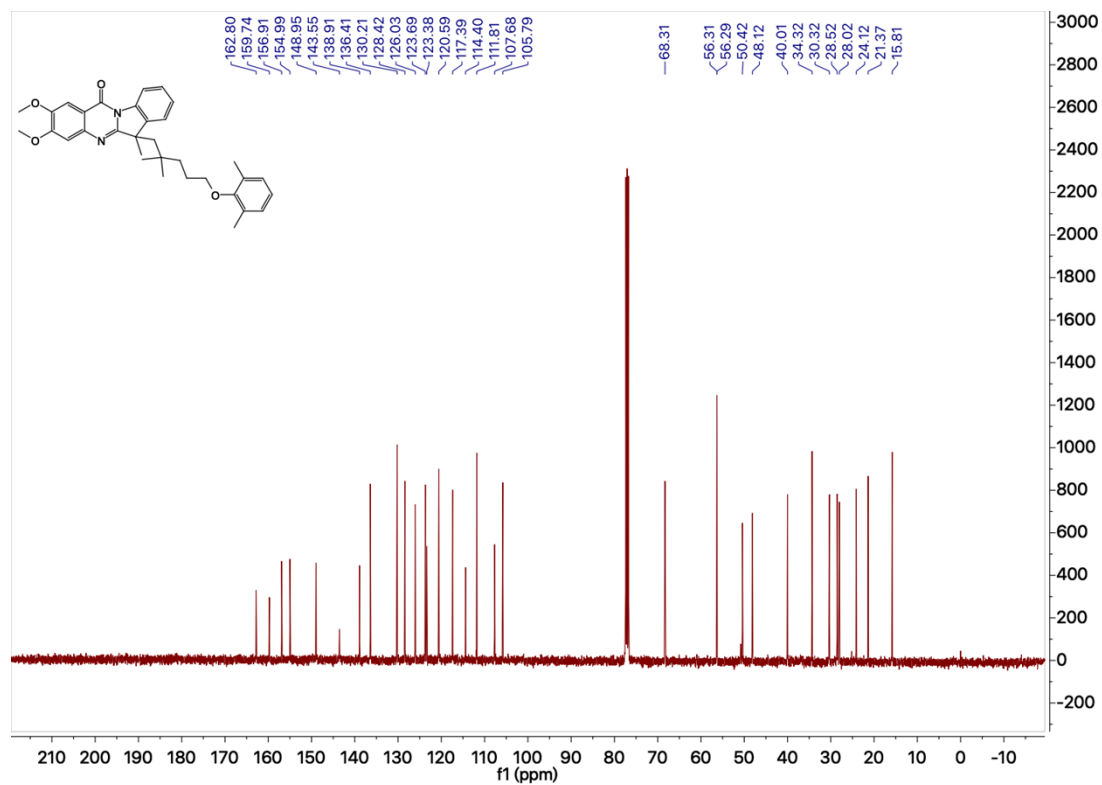

## V. Computational Details

All DFT theoretical calculations have been carried out using the Gaussian09 program package<sup>[1]</sup>. The B3LYP<sup>[2]</sup> density functional method with the D3(BJ) dispersion correction was employed in this work to carry out all the computations. The 6-31G(d) basis set was used for the atoms in geometry optimizations using the PCM model<sup>[3]</sup> with DMSO as the solvent. Vibrational frequency analyses at the same level of theory were performed on all optimized structures to characterize stationary points as local minima or transition states. Furthermore, intrinsic reaction coordinate (IRC) computations were carried out to confirm that transition states connect to the appropriate reactants and products. The single-point energy calculations were carried out using the 6-311++g(d,p) basis set to provide better energy correction.

### (1) Calculated IRC Pathways and Imaginary Frequencies Vector of all Transition States

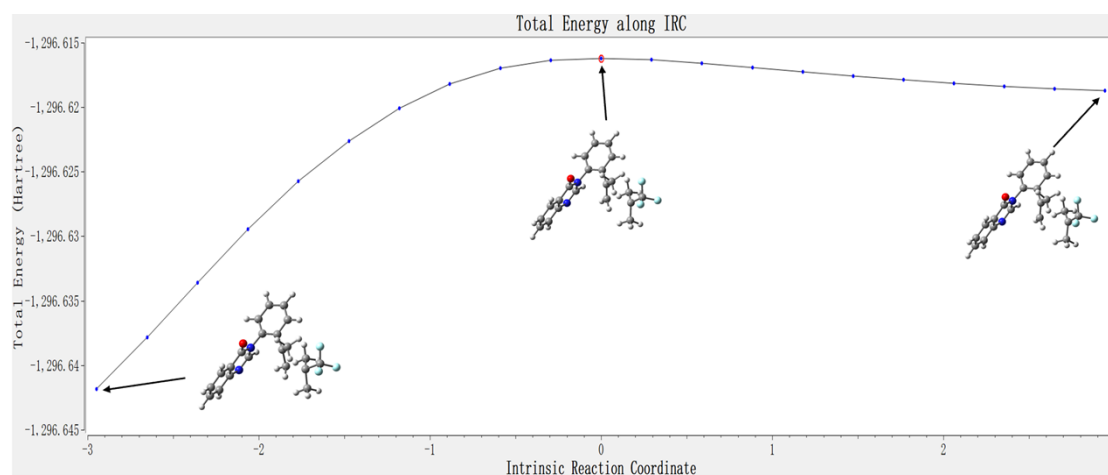

Figure S2: IRC pathway for TS1

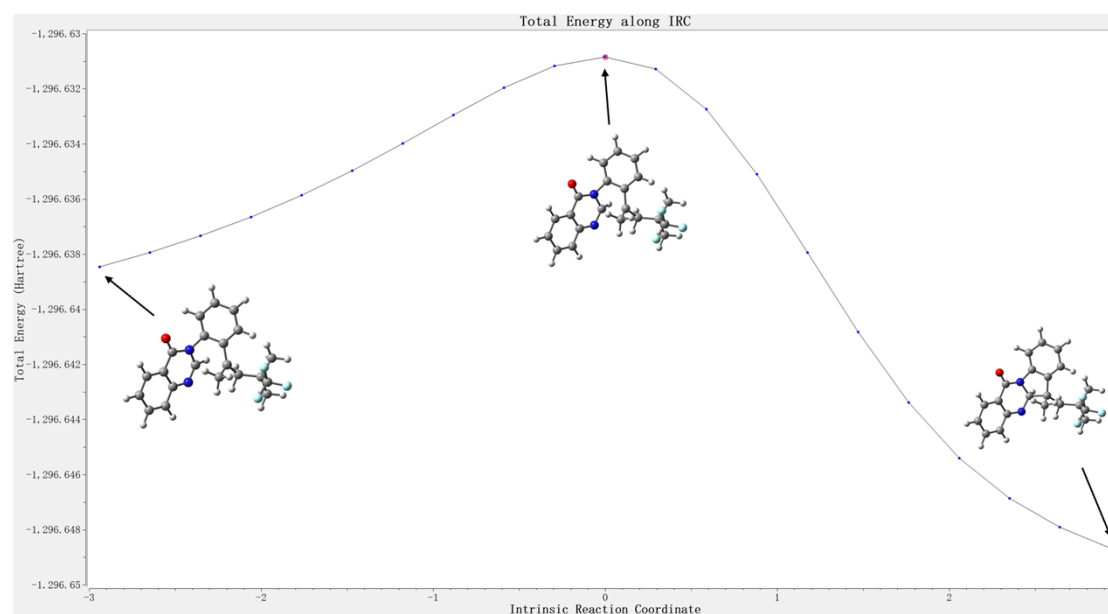

Figure S3: IRC pathway for TS2

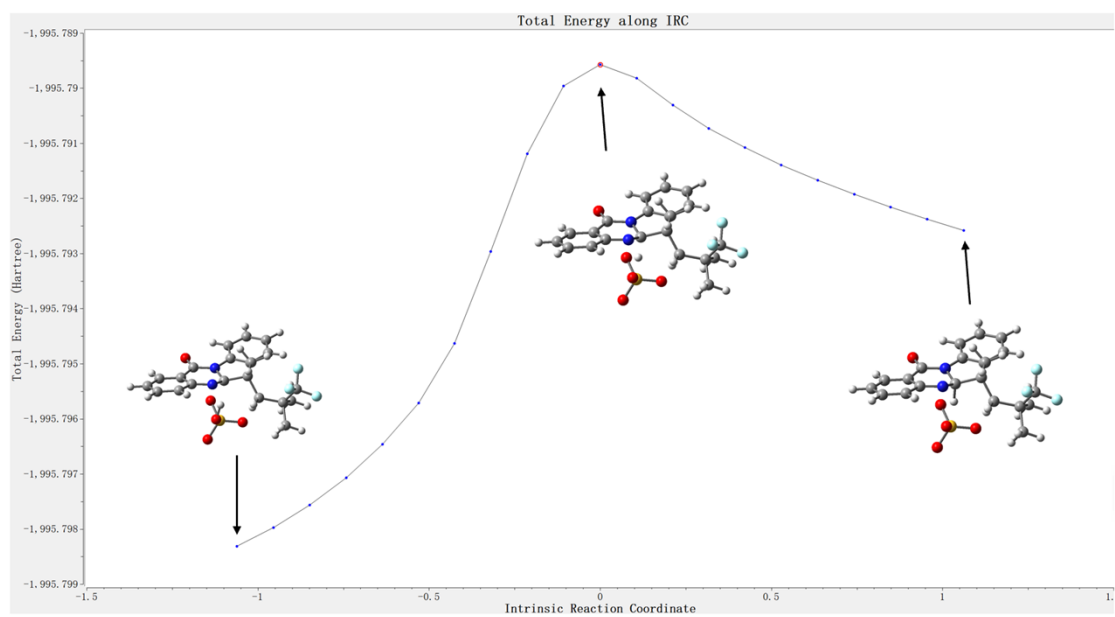

Figure S4: IRC pathway for **TS3**

### 3D Structure and Coordinates of all Stationary Point

2

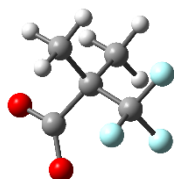

Charge: -1

Spin: 1

|   |             |             |             |
|---|-------------|-------------|-------------|
| C | -0.27975900 | 0.50665400  | 0.00042700  |
| C | -0.37752500 | 1.38391700  | 1.26046900  |
| H | -0.26905400 | 0.78359000  | 2.16998900  |
| H | 0.39088800  | 2.16476900  | 1.26882300  |
| H | -1.36328800 | 1.85278500  | 1.27504800  |
| C | -0.37784400 | 1.38598400  | -1.25813100 |
| H | 0.39060800  | 2.16680000  | -1.26548400 |
| H | -0.26972300 | 0.78712900  | -2.16867100 |
| H | -1.36361000 | 1.85485500  | -1.27156200 |
| C | 1.06724900  | -0.19678600 | -0.00032400 |
| F | 1.27270400  | -0.97356900 | 1.08978300  |
| F | 2.09973100  | 0.70718200  | -0.00047700 |
| F | 1.27171100  | -0.97281400 | -1.09116400 |
| C | -1.48278200 | -0.52150300 | -0.00015000 |
| O | -1.20801000 | -1.74563100 | 0.00066200  |
| O | -2.61813500 | 0.01979200  | -0.00130800 |

Zero-point correction=

0.110742 (Hartree/Particle)

Thermal correction to Energy=0.120796

Thermal correction to Enthalpy=0.121740

Thermal correction to Gibbs Free Energy=  
0.073915

Sum of electronic and zero-point Energies=

-644.188556

Sum of electronic and thermal Energies=

-644.178503

Sum of electronic and thermal Enthalpies=

-644.177559

Sum of electronic and thermal Free Energies=

-644.225384

E (B3LYP-(D3)/6-311++G(d,p)) =

-644.299299

SO<sub>4</sub><sup>-</sup>

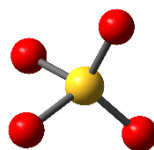

Charge: -1

Spin: 2

|   |             |             |             |
|---|-------------|-------------|-------------|
| S | 0.08127600  | -0.00009700 | -0.00033600 |
| O | 0.88279500  | 1.24150700  | -0.00468000 |
| O | 0.88790700  | -1.23797400 | 0.00509200  |
| O | -0.96659100 | -0.00704100 | -1.12746600 |
| O | -0.96666400 | 0.00370200  | 1.12772700  |

Zero-point correction=0.014059

(Hartree/Particle)

Thermal correction to Energy=0.018498

Thermal correction to Enthalpy=0.019442

Thermal correction to Gibbs Free Energy=  
-0.014330

Sum of electronic and zero-point Energies=

-699.115619

Sum of electronic and thermal Energies=

-699.111180

Sum of electronic and thermal Enthalpies=

-699.110236

Sum of electronic and thermal Free Energies=

-699.144008

E (B3LYP-(D3)/6-311++G(d,p)) =

-699.129678

**C-radical**

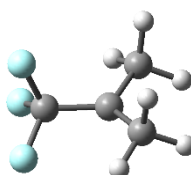

Charge: 0

Spin: 2

|   |            |            |             |
|---|------------|------------|-------------|
| C | 0.84994000 | 0.00000000 | -0.16403900 |
| C | 1.57586300 | 1.29568900 | -0.01464700 |
| H | 0.98860600 | 2.13998200 | -0.38471100 |
| H | 1.81450600 | 1.49721500 | 1.04335800  |

H 2.52975900 1.26543400 -0.55273200  
 C 1.57582500 -1.29571000 -0.01464800  
 H 1.81454200 -1.49719900 1.04334700  
 H 0.98850800 -2.13999500 -0.38463400  
 H 2.52968100 -1.26551700 -0.55280700  
 C -0.62724100 0.00000900 -0.02213900  
 F -1.20531500 1.09022900 -0.58447600  
 F -1.02400100 -0.00012100 1.28928000  
 F -1.20534200 -1.09009100 -0.58469100

Zero-point correction=0.094699

(Hartree/Particle)

Thermal correction to Energy=0.102917

Thermal correction to Enthalpy=0.103861

Thermal correction to Gibbs Free Energy=  
0.059578

Sum of electronic and zero-point Energies=  
-455.444369

Sum of electronic and thermal Energies=  
-455.436152

Sum of electronic and thermal Enthalpies=  
-455.435207

Sum of electronic and thermal Free Energies=  
-455.479490

E (B3LYP-(D3)/6-311++G(d,p)) =  
-455.539069

**SO<sub>4</sub><sup>2-</sup>+CO<sub>2</sub>**

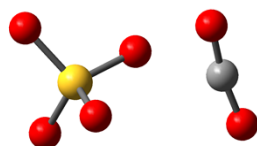

Charge: -2

Spin: 1

C 2.21566300 0.00666000 -0.00016500  
 O 2.35230700 -1.15689900 0.00007000  
 O 2.28536600 1.17650500 0.00004100  
 S -1.05289200 -0.00319900 0.00000500  
 O -1.81503500 1.30697500 -0.00092200  
 O -0.17683300 -0.08044400 1.23955600  
 O -0.17487800 -0.08106100 -1.23812400  
 O -2.02689100 -1.16367300 -0.00050700

Zero-point correction=0.027887

(Hartree/Particle)

Thermal correction to Energy=0.035872

Thermal correction to Enthalpy=0.036816

Thermal correction to Gibbs Free Energy=  
-0.006408

Sum of electronic and zero-point Energies=  
-887.867413

Sum of electronic and thermal Energies=  
-887.859428

Sum of electronic and thermal Enthalpies=  
-887.858483

Sum of electronic and thermal Free Energies=  
-887.901707

E (B3LYP-(D3)/6-311++G(d,p)) =  
-887.895300

**TS1**

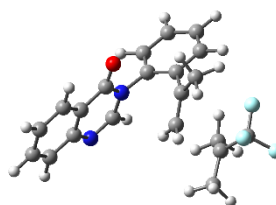

Charge: 0

Spin: 2

C -5.35990000 -2.00586400 -0.07777200  
 C -4.55721500 -1.58353800 -1.12627900  
 C -3.50603600 -0.67756900 -0.89160700  
 C -3.28593800 -0.20842600 0.42452300  
 C -4.10768600 -0.64318900 1.47735000  
 C -5.13742000 -1.53671900 1.22991800  
 H -6.16835200 -2.70557900 -0.26750200  
 H -4.71660800 -1.93674300 -2.13981800  
 C -2.20000400 0.73443600 0.69051300  
 H -3.91399100 -0.26552000 2.47545300  
 H -5.77242900 -1.87536000 2.04239600  
 C -1.75409400 0.54554700 -1.69820000  
 H -1.09507300 0.88006500 -2.49456800  
 O -1.93262400 1.22075200 1.78471900  
 N -2.71539200 -0.27469100 -1.96100400  
 N -1.44669900 1.05944600 -0.45600400  
 C -0.31346200 1.93668800 -0.32493100  
 C 0.81775900 1.52855100 0.40940900  
 C -0.37903700 3.18668000 -0.93644100  
 C 1.86992700 2.45322100 0.52254400  
 C 0.69417900 4.07141500 -0.83580900  
 H -1.27935200 3.46437400 -1.47558800

C 1.81824500 3.70041700 -0.09780200  
 H 2.75809500 2.17083600 1.07609900  
 H 0.64370700 5.04223600 -1.31814400  
 H 2.65923600 4.38094700 -0.00512700  
 C 0.92386600 0.19727000 1.05072700  
 C 0.68007200 -0.95057000 0.35557700  
 H 0.67733900 -1.90432500 0.87258500  
 H 0.20854400 -0.93719300 -0.61909600  
 C 1.40586900 0.15672400 2.47637400  
 H 2.42117300 0.55695300 2.57839700  
 H 0.75012200 0.76201500 3.11337100  
 H 1.41600200 -0.86868100 2.85424700  
 C 2.59899700 -1.55419100 -0.86218200  
 C 2.23263300 -2.96006900 -1.24116400  
 H 1.27391900 -2.97570000 -1.77017100  
 H 2.98537900 -3.39358500 -1.91831700  
 H 2.15743200 -3.61249600 -0.36666100  
 C 2.61884700 -0.51648600 -1.94589100  
 H 2.68289300 0.49589300 -1.54010200  
 H 3.47820400 -0.66499300 -2.61925300  
 H 1.71255200 -0.58874100 -2.55595300  
 C 3.66337900 -1.43673300 0.17011200  
 F 3.38687700 -2.13799600 1.29897000  
 F 3.90020000 -0.15499200 0.54765700  
 F 4.86613800 -1.91915500 -0.27937900  
 Zero-point correction=0.368049  
 (Hartree/Particle)  
 Thermal correction to Energy=0.392617  
 Thermal correction to Enthalpy=0.393562  
 Thermal correction to Gibbs Free Energy=  
 0.311705  
 Sum of electronic and zero-point Energies=  
 -1296.248170  
 Sum of electronic and thermal Energies=  
 -1296.223601  
 Sum of electronic and thermal Enthalpies=  
 -1296.222657  
 Sum of electronic and thermal Free Energies=  
 -1296.304513  
 E (B3LYP-(D3)/6-311++G(d,p)) =  
 -1296.616218  
 Imaginary frequencies= -290.48

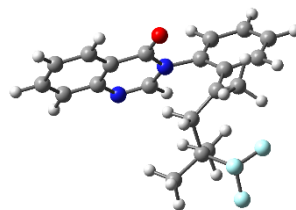

Charge: 0  
 Spin: 2  
 C 5.20520800 1.66448700 0.04000600  
 C 4.42317800 1.26490200 -1.03276300  
 C 3.31695100 0.42048500 -0.82468400  
 C 3.01966000 -0.01053200 0.48926700  
 C 3.82266700 0.39880700 1.56676900  
 C 4.90733800 1.23194300 1.34537300  
 H 6.05662400 2.31694300 -0.12880900  
 H 4.64125900 1.58880500 -2.04511500  
 C 1.87365400 -0.88724100 0.72895600  
 H 3.57006000 0.05129900 2.56259800  
 H 5.52719000 1.55216300 2.17675700  
 C 1.53059900 -0.71897100 -1.67822200  
 H 0.89586700 -1.04337000 -2.49708600  
 O 1.54369100 -1.34253900 1.81862400  
 N 2.55151700 0.03310400 -1.91772900  
 N 1.12600400 -1.16778700 -0.43661200  
 C -0.04366600 -2.00073000 -0.34291800  
 C -1.17214600 -1.60930100 0.43230300  
 C 0.00328700 -3.22367900 -1.00648900  
 C -2.21551400 -2.56975000 0.51912900  
 C -1.06473800 -4.11774000 -0.93573600  
 H 0.90114900 -3.48302700 -1.55918000  
 C -2.17372800 -3.78302700 -0.15460700  
 H -3.09776100 -2.32239700 1.09794500  
 H -1.01795500 -5.06515300 -1.46239000  
 H -3.01239800 -4.46828300 -0.07468400  
 C -1.32725200 -0.35308600 1.13079700  
 C -0.80694300 0.96800000 0.63188800  
 H -0.74143800 1.65710000 1.47942400  
 H 0.20183400 0.88917900 0.22463500  
 C -2.17916200 -0.32541500 2.37097900  
 H -3.24641500 -0.18805100 2.14750600  
 H -2.08305600 -1.25244600 2.94508000  
 H -1.88525100 0.50986600 3.01447000  
 C -1.62381000 1.68976200 -0.49487000  
 C -1.00423200 3.08507900 -0.69645400

**TS1-int**

H 0.05851200 2.97691600 -0.93342700  
H -1.48697100 3.61626400 -1.52101200  
H -1.09264800 3.69357800 0.20887600  
C -1.58998200 0.90810400 -1.81687400  
H -1.93723600 -0.11946900 -1.69140600  
H -2.21667000 1.39625700 -2.56943900  
H -0.56602500 0.88801400 -2.19888100  
C -3.08087700 1.86689300 -0.07682300  
F -3.19954900 2.40928400 1.16020200  
F -3.76645100 0.69563600 -0.05947600  
F -3.75442100 2.68341000 -0.92457100

Zero-point correction=0.372524

(Hartree/Particle)

Thermal correction to Energy=0.396243

Thermal correction to Enthalpy=0.397187

Thermal correction to Gibbs Free Energy=  
0.317857

Sum of electronic and zero-point Energies=  
-1296.285536

Sum of electronic and thermal Energies=  
-1296.261818

Sum of electronic and thermal Enthalpies=  
-1296.260873

Sum of electronic and thermal Free Energies=  
-1296.340203

E (B3LYP-(D3)/6-311++G(d,p)) =  
-1296.658060

## TS2

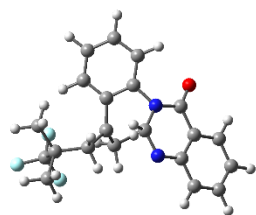

Charge: 0

Spin: 2

C 4.61198600 -2.80091600 -0.24270500  
C 3.40862600 -2.64941000 0.42495200  
C 2.81477100 -1.37091700 0.55053800  
C 3.48255900 -0.25185600 -0.02234600  
C 4.69965300 -0.42364900 -0.69126300  
C 5.26607700 -1.68764400 -0.80291300  
H 5.05691800 -3.78739400 -0.33318600

H 2.89542400 -3.49630000 0.86868600  
C 2.85898000 1.07945200 0.02253200  
H 5.18092700 0.44818000 -1.12117100  
H 6.21087800 -1.81726300 -1.32098200  
C 1.05627100 -0.06028500 1.26754900  
O 3.32982200 2.08349400 -0.50865300  
N 1.65083900 -1.24954400 1.25936100  
N 1.63409700 1.10600900 0.69398500  
C 0.63962100 2.07778700 0.38418000  
C -0.60871500 1.50714500 0.05422600  
C 0.85918000 3.45081000 0.36822600  
C -1.63102600 2.36774900 -0.35319700  
C -0.19104200 4.28990500 -0.01034400  
H 1.82981700 3.84681400 0.63548200  
C -1.42428800 3.75050000 -0.37670800  
H -2.57456700 1.96350700 -0.69282300  
H -0.03917700 5.36472800 -0.02563100  
H -2.23146600 4.40431000 -0.69271900  
C -0.64671400 0.00483500 0.07037400  
C -1.59241200 -0.79703800 0.95206200  
H -1.15757900 -1.80122700 0.99749600  
H -1.54379300 -0.39508000 1.97010400  
C -0.15923900 -0.63327400 -1.20877800  
H -0.88217500 -0.47864400 -2.01687200  
H 0.78397000 -0.18180100 -1.53417700  
H -0.00832400 -1.70863500 -1.08017800  
C -3.12908100 -0.97141200 0.69357500  
C -3.56541900 -2.23931200 1.45883800  
H -3.26823700 -2.14748900 2.50758000  
H -4.65056400 -2.36657400 1.42010100  
H -3.09253500 -3.13500400 1.04582200  
C -3.94015800 0.22344100 1.22631500  
H -3.61303900 1.17594800 0.81163000  
H -5.00445300 0.09644800 1.00824900  
H -3.82082600 0.27448500 2.31266500  
C -3.45272800 -1.19093300 -0.77775300  
F -2.73517700 -2.20713000 -1.31417700  
F -3.20561300 -0.09258400 -1.54197600  
F -4.75842200 -1.49361000 -0.96926700  
H 0.44717000 0.16782700 2.14033300

Zero-point correction=0.372105

(Hartree/Particle)

Thermal correction to Energy=0.394847

Thermal correction to Enthalpy=0.395791

Thermal correction to Gibbs Free Energy=  
 0.320639  
 Sum of electronic and zero-point Energies=  
 -1296.258738  
 Sum of electronic and thermal Energies=  
 -1296.235996  
 Sum of electronic and thermal Enthalpies=  
 -1296.235052  
 Sum of electronic and thermal Free Energies=  
 -1296.310204  
 E ( B3LYP-(D3)/6-311++G(d,p) ) =  
 -1296.630843  
 Imaginary frequencies= -488.43

**TS2-int**

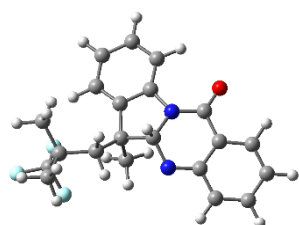

Charge: 0  
 Spin: 2

C 4.86460800 -2.72488600 -0.25749500  
 C 3.49486800 -2.68653400 -0.08395600  
 C 2.82018300 -1.44336100 0.12175700  
 C 3.60286400 -0.23703800 0.10879400  
 C 4.97880300 -0.30252600 -0.06978600  
 C 5.61626800 -1.53448600 -0.24401600  
 H 5.36607900 -3.67678800 -0.40156500  
 H 2.89467000 -3.59027600 -0.08212000  
 C 2.93930100 1.08655600 0.18102300  
 H 5.54292700 0.62367500 -0.08308700  
 H 6.69246100 -1.57169000 -0.37788100  
 C 0.86142100 -0.24256800 0.65285600  
 O 3.54603900 2.15213200 0.04004600  
 N 1.49949400 -1.47001600 0.33279900  
 N 1.58472100 1.00788300 0.35035000  
 C 0.63976700 2.03890800 0.19358400  
 C -0.64155900 1.48465200 0.00719100  
 C 0.87223200 3.41338300 0.17073900  
 C -1.69819100 2.34129100 -0.28445800  
 C -0.21768600 4.25409400 -0.07147300  
 H 1.87009600 3.79989700 0.32168600

C -1.48795700 3.72598000 -0.30654300  
 H -2.67539600 1.94788100 -0.52620100  
 H -0.06519200 5.32921000 -0.08955200  
 H -2.32100500 4.38887000 -0.51990200  
 C -0.55553200 -0.04224100 -0.01482100  
 C -1.50833000 -0.90473100 0.86135700  
 H -1.12652000 -1.92449300 0.73952500  
 H -1.30887000 -0.63842900 1.90549500  
 C -0.46160300 -0.50706000 -1.48324200  
 H -1.34486700 -0.21143700 -2.04706600  
 H 0.41125100 -0.04711600 -1.95878400  
 H -0.34980800 -1.59308600 -1.53730300  
 C -3.06385400 -0.98957300 0.80431700  
 C -3.44504200 -2.28890500 1.55358700  
 H -2.98459400 -2.28079100 2.54564300  
 H -4.52793000 -2.36718600 1.67908600  
 H -3.08935900 -3.17448300 1.01873500  
 C -3.73873300 0.19178200 1.52680400  
 H -3.42860000 1.16045900 1.13882900  
 H -4.82781300 0.11922600 1.45373700  
 H -3.46842900 0.15600000 2.58651400  
 C -3.62867200 -1.11504400 -0.60493900  
 F -3.02652100 -2.09954000 -1.31374200  
 F -3.50713500 0.02577300 -1.33607300  
 F -4.95330500 -1.40208400 -0.59265300  
 H 0.70680100 -0.25506700 1.74632200  
 Zero-point correction=  
 0.374649 (Hartree/Particle)  
 Thermal correction to Energy=  
 0.397289  
 Thermal correction to Enthalpy=  
 0.398233  
 Thermal correction to Gibbs Free Energy=  
 0.323387  
 Sum of electronic and zero-point Energies=  
 -1296.279782  
 Sum of electronic and thermal Energies=  
 -1296.257143  
 Sum of electronic and thermal Enthalpies=  
 -1296.256198  
 Sum of electronic and thermal Free Energies=  
 -1296.331045  
 E ( B3LYP-(D3)/6-311++G(d,p) ) =  
 -1296.654432



### TS3

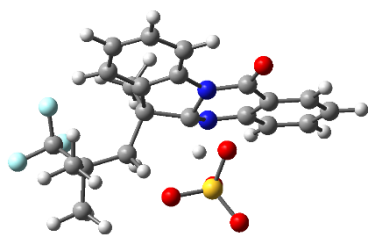

Charge: -1

Spin: 3

|   |             |             |             |
|---|-------------|-------------|-------------|
| C | 4.74237700  | -2.73614800 | -1.23175500 |
| C | 3.36202300  | -2.71441500 | -1.32884900 |
| C | 2.63654600  | -1.51141100 | -1.06974200 |
| C | 3.38580700  | -0.31329400 | -0.79625200 |
| C | 4.76873300  | -0.35466000 | -0.72884200 |
| C | 5.45338100  | -1.56467300 | -0.91996700 |
| H | 5.28083000  | -3.66342900 | -1.39979300 |
| H | 2.79253300  | -3.60816500 | -1.56010600 |
| C | 2.68212200  | 0.98732700  | -0.76031400 |
| H | 5.31287900  | 0.56591700  | -0.54639600 |
| H | 6.53565200  | -1.58755600 | -0.85064100 |
| C | 0.65508600  | -0.38713200 | -0.56274900 |
| O | 3.24987300  | 2.07251500  | -0.78071200 |
| N | 1.30048800  | -1.54648300 | -1.08840900 |
| N | 1.29206000  | 0.86883300  | -0.80311200 |
| C | 0.34843400  | 1.89268800  | -0.90819100 |
| C | -0.94153600 | 1.32622500  | -0.94291800 |
| C | 0.57399100  | 3.26815300  | -1.01924100 |
| C | -2.02730000 | 2.16426600  | -1.17551200 |
| C | -0.53729800 | 4.08804300  | -1.19889800 |
| H | 1.57709300  | 3.66542700  | -0.97145000 |
| C | -1.82407000 | 3.54309900  | -1.29108500 |
| H | -3.02155900 | 1.75659500  | -1.29182900 |
| H | -0.39784200 | 5.16121400  | -1.28452200 |
| H | -2.67484300 | 4.19497700  | -1.46331200 |
| C | -0.85833800 | -0.19218400 | -0.87246900 |
| C | -1.60931100 | -0.94792900 | 0.26983500  |
| H | -1.33167900 | -1.99786500 | 0.12114400  |
| H | -1.14327100 | -0.64304600 | 1.20661900  |
| C | -1.14743400 | -0.77245400 | -2.28050200 |
| H | -2.15506500 | -0.51154400 | -2.60144800 |
| H | -0.43868800 | -0.36318700 | -3.00745400 |
| H | -1.04255700 | -1.85932500 | -2.27164800 |
| C | -3.12627400 | -0.91480700 | 0.61199800  |

|   |             |             |             |
|---|-------------|-------------|-------------|
| C | -3.33355900 | -2.06499800 | 1.62784900  |
| H | -2.64325600 | -1.92804300 | 2.46487800  |
| H | -4.35395300 | -2.06547400 | 2.01930200  |
| H | -3.13276600 | -3.03974600 | 1.17310400  |
| C | -3.54434000 | 0.39893600  | 1.29838400  |
| H | -3.45378000 | 1.26717500  | 0.64826500  |
| H | -4.58007200 | 0.33710000  | 1.64643600  |
| H | -2.89145300 | 0.56072800  | 2.16025000  |
| C | -4.04106300 | -1.19951800 | -0.57106400 |
| F | -3.65796100 | -2.30021200 | -1.26219700 |
| F | -4.09663300 | -0.17786400 | -1.47093300 |
| F | -5.32276900 | -1.41009300 | -0.18317500 |
| H | 0.82167300  | -0.60102300 | 0.71708200  |
| S | 1.04851900  | 0.37981000  | 2.82416300  |
| O | -0.39884900 | 0.61425800  | 3.10166300  |
| O | 1.82279100  | 0.01174400  | 4.04318700  |
| O | 1.66833600  | 1.48828600  | 2.04049800  |
| O | 1.15839600  | -0.93071400 | 1.90711500  |

Zero-point correction=0.385001

(Hartree/Particle)

Thermal correction to Energy=0.413337

Thermal correction to Enthalpy=0.414281

Thermal correction to Gibbs Free Energy=  
0.325531

Sum of electronic and zero-point Energies=  
-1995.404569

Sum of electronic and thermal Energies=  
-1995.376233

Sum of electronic and thermal Enthalpies=  
-1995.375289

Sum of electronic and thermal Free Energies=  
-1995.464039

E (B3LYP-(D3)/6-311++G(d,p)) =  
-1995.789570

Imaginary frequencies= -1230.57

### TS3-pro

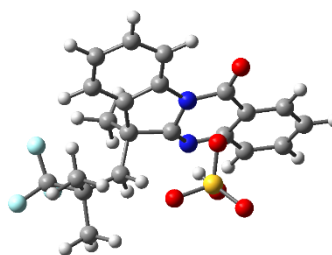

Charge: -1  
Spin: 3

|   |             |             |             |
|---|-------------|-------------|-------------|
| C | 4.74747500  | -2.56980300 | -1.52159800 |
| C | 3.37727400  | -2.55349400 | -1.66729000 |
| C | 2.61449200  | -1.37979500 | -1.31002200 |
| C | 3.35266900  | -0.19910800 | -0.88909600 |
| C | 4.72414200  | -0.24042700 | -0.77609100 |
| C | 5.43547600  | -1.42627500 | -1.06500500 |
| H | 5.30596400  | -3.46867800 | -1.76343500 |
| H | 2.82720100  | -3.42265100 | -2.01163000 |
| C | 2.62597400  | 1.08357400  | -0.72036400 |
| H | 5.25377800  | 0.65887400  | -0.47933000 |
| H | 6.51447900  | -1.44562700 | -0.95859200 |
| C | 0.61134800  | -0.30127300 | -0.84570400 |
| O | 3.18578500  | 2.16586000  | -0.57096500 |
| N | 1.29737200  | -1.42668100 | -1.35323000 |
| N | 1.24798300  | 0.95941200  | -0.82039300 |
| C | 0.28537300  | 1.98556000  | -0.80287400 |
| C | -0.99151400 | 1.41109400  | -0.94509000 |
| C | 0.48600700  | 3.36350700  | -0.71924000 |
| C | -2.08868000 | 2.25389600  | -1.09188300 |
| C | -0.63792500 | 4.18446100  | -0.81896000 |
| H | 1.47938000  | 3.76844300  | -0.59195700 |
| C | -1.91075500 | 3.63956600  | -1.01892800 |
| H | -3.07400100 | 1.84482400  | -1.27298100 |
| H | -0.51478000 | 5.26148100  | -0.75643400 |
| H | -2.76966100 | 4.29552700  | -1.12259400 |
| C | -0.89150700 | -0.10876900 | -1.04238600 |
| C | -1.55118500 | -0.96302700 | 0.09714000  |
| H | -1.28586100 | -1.99668500 | -0.15256400 |
| H | -1.01747700 | -0.72348700 | 1.01798000  |
| C | -1.29015000 | -0.58293000 | -2.46259400 |
| H | -2.33062500 | -0.34239800 | -2.67835300 |
| H | -0.66113900 | -0.08785100 | -3.20940900 |
| H | -1.14853100 | -1.66266300 | -2.55333600 |
| C | -3.03777200 | -0.96220900 | 0.56001600  |
| C | -3.15577000 | -2.16380200 | 1.52927200  |
| H | -2.40843400 | -2.05150100 | 2.31972500  |
| H | -4.14572400 | -2.20127400 | 1.99110600  |
| H | -2.97489100 | -3.11203000 | 1.01373000  |
| C | -3.41136600 | 0.31178400  | 1.33997800  |
| H | -3.37739900 | 1.20996600  | 0.72601300  |
| H | -4.41764200 | 0.22050900  | 1.76125000  |
| H | -2.69723700 | 0.43558500  | 2.15844900  |

|   |             |             |             |
|---|-------------|-------------|-------------|
| C | -4.03681900 | -1.19242600 | -0.56517900 |
| F | -3.69521800 | -2.24423400 | -1.34853600 |
| F | -4.17302500 | -0.12010700 | -1.39482600 |
| F | -5.28319500 | -1.44677100 | -0.09523500 |
| H | 1.06386600  | -0.87236200 | 1.03688200  |
| S | 1.09985800  | 0.12384900  | 2.96048000  |
| O | -0.37123500 | 0.02093900  | 3.15590800  |
| O | 1.89740300  | -0.24519100 | 4.14823300  |
| O | 1.52029300  | 1.37391900  | 2.28354400  |
| O | 1.49097200  | -1.09794300 | 1.90027000  |

Zero-point correction=0.388681  
(Hartree/Particle)  
Thermal correction to Energy=0.417929  
Thermal correction to Enthalpy=0.418873  
Thermal correction to Gibbs Free Energy=  
0.327760  
Sum of electronic and zero-point Energies=  
-1995.413588  
Sum of electronic and thermal Energies=  
-1995.384340  
Sum of electronic and thermal Enthalpies=  
-1995.383396  
Sum of electronic and thermal Free Energies=  
-1995.474510  
E ( B3LYP-(D3)/6-311++G(d,p) ) =  
-1995.802269

### 3aa

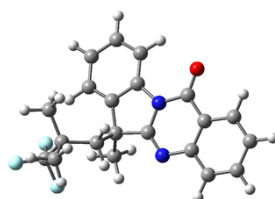

Charge: 0  
Spin: 1

|   |            |             |             |
|---|------------|-------------|-------------|
| C | 5.01230900 | -2.53625400 | -0.14276500 |
| C | 3.65268600 | -2.51927300 | -0.41394000 |
| C | 2.91539000 | -1.33053000 | -0.26421200 |
| C | 3.58348300 | -0.15795700 | 0.16520900  |
| C | 4.96141000 | -0.19046000 | 0.43632300  |
| C | 5.67268700 | -1.36987800 | 0.28430300  |
| H | 5.57238200 | -3.45905800 | -0.26094600 |
| H | 3.12954600 | -3.41105000 | -0.74329200 |
| C | 2.84318500 | 1.09646800  | 0.32237200  |

|                                          |             |             |                                              |
|------------------------------------------|-------------|-------------|----------------------------------------------|
| H 5.44607000                             | 0.72323400  | 0.76302200  | Sum of electronic and zero-point Energies=   |
| H 6.73734700                             | -1.39532100 | 0.49369700  | -1295.743568                                 |
| C 0.91739400                             | -0.23781000 | -0.39698900 | Sum of electronic and thermal Energies=      |
| O 3.32627900                             | 2.16766200  | 0.68428000  | -1295.721164                                 |
| N 1.55298200                             | -1.34757000 | -0.54083600 | Sum of electronic and thermal Enthalpies=    |
| N 1.48421300                             | 0.96649600  | 0.00821800  | -1295.720220                                 |
| C 0.50195900                             | 1.99686800  | -0.00810200 | Sum of electronic and thermal Free Energies= |
| C -0.72825800                            | 1.44391900  | -0.39269500 | -1295.793931                                 |
| C 0.67142500                             | 3.35498600  | 0.24224900  | E ( B3LYP-(D3)/6-311++G(d,p) ) =             |
| C -1.81269900                            | 2.28942600  | -0.59598400 | -1296.107945                                 |
| C -0.44352500                            | 4.18186100  | 0.07043900  |                                              |
| H 1.63290400                             | 3.74469600  | 0.54293500  |                                              |
| C -1.66725900                            | 3.66081700  | -0.35537700 |                                              |
| H -2.76197200                            | 1.89483600  | -0.93565200 |                                              |
| H -0.34506000                            | 5.24681300  | 0.25752700  |                                              |
| H -2.51465200                            | 4.32268700  | -0.50486900 |                                              |
| C -0.58932600                            | -0.05744200 | -0.60172700 |                                              |
| C -1.20603300                            | -0.97508500 | 0.51326500  |                                              |
| H -0.91327700                            | -1.98974400 | 0.22730800  |                                              |
| H -0.65809200                            | -0.75680800 | 1.43664100  |                                              |
| C -0.94707800                            | -0.48663400 | -2.03833000 |                                              |
| H -1.99456400                            | -0.29308600 | -2.26110800 |                                              |
| H -0.33617500                            | 0.07196300  | -2.75399100 |                                              |
| H -0.74671900                            | -1.55317200 | -2.17023500 |                                              |
| C -2.69545900                            | -1.01612500 | 0.96230800  |                                              |
| C -2.81316500                            | -2.25437100 | 1.88339300  |                                              |
| H -2.07936400                            | -2.17551400 | 2.69049600  |                                              |
| H-3.80831700                             | -2.31647200 | 2.33030400  |                                              |
| H -2.61877200                            | -3.17978700 | 1.33301100  |                                              |
| C -3.11752900                            | 0.22711400  | 1.76525500  |                                              |
| H -3.05114400                            | 1.14677200  | 1.18650200  |                                              |
| H -4.14501000                            | 0.11683100  | 2.12495900  |                                              |
| H -2.46245000                            | 0.32793200  | 2.63582900  |                                              |
| C -3.67057700                            | -1.22823600 | -0.19085900 |                                              |
| F -3.28641300                            | -2.23818800 | -1.00742000 |                                              |
| F -3.82156200                            | -0.12647900 | -0.97604600 |                                              |
| F -4.91418000                            | -1.53399300 | 0.24981200  |                                              |
| Zero-point correction=0.364377           |             |             |                                              |
| (Hartree/Particle)                       |             |             |                                              |
| Thermal correction to Energy=0.386781    |             |             |                                              |
| Thermal correction to Enthalpy=0.387725  |             |             |                                              |
| Thermal correction to Gibbs Free Energy= |             |             |                                              |
| 0.314014                                 |             |             |                                              |

## VI. Reference

- 1 (a) Y. Z. Lu, L. Feng, X. G. Jiang, Y. Y. Zhao, G. Y. Zhao, C. Z. Yuan. *J Mol Model*, 2018, **24**, 135. (b) N. K. Gour, S. S. Begum, R. C. Deka. *Chemical Physics Letters*, 2018, **701**, 157-164.
- 2 (a) D. P. Chong. *Canadian Journal of Chemistry*, 2018, **96**, 336-339. (b) R. Inostroza-Rivera, B. Herrera, A. Toro-Labbé. *Physical Chemistry Chemical Physics*, 2014, **16**, 14489-14495. (c) Y.S. Mary, C. Y. Panicker, M. Sapnakumari, B. Narayana, B. K. Sarojini, A. A. Al-Saadi, C. Van Alsenoy, J.A. War, H. K. Fun, *Spectrochimica Acta Part A: Molecular and Biomolecular Spectroscopy*, 2015, **136**, 473-482.
- 3 (a) P. B. Wilson, I. H. Williams. *Molecular Physics*, 2015, **113**, 1704-1711.
